# Supplementary material for: RNA-Seq Dissects Incomplete Activation of Phytoalexin Biosynthesis by the Soybean Transcription Factors GmMYB29A2 and GmNAC42-1
Source: MDPI journal article supplement (doi:10.3390/plants12030545), 2023-01-25
Supplement: s1 [file s1]

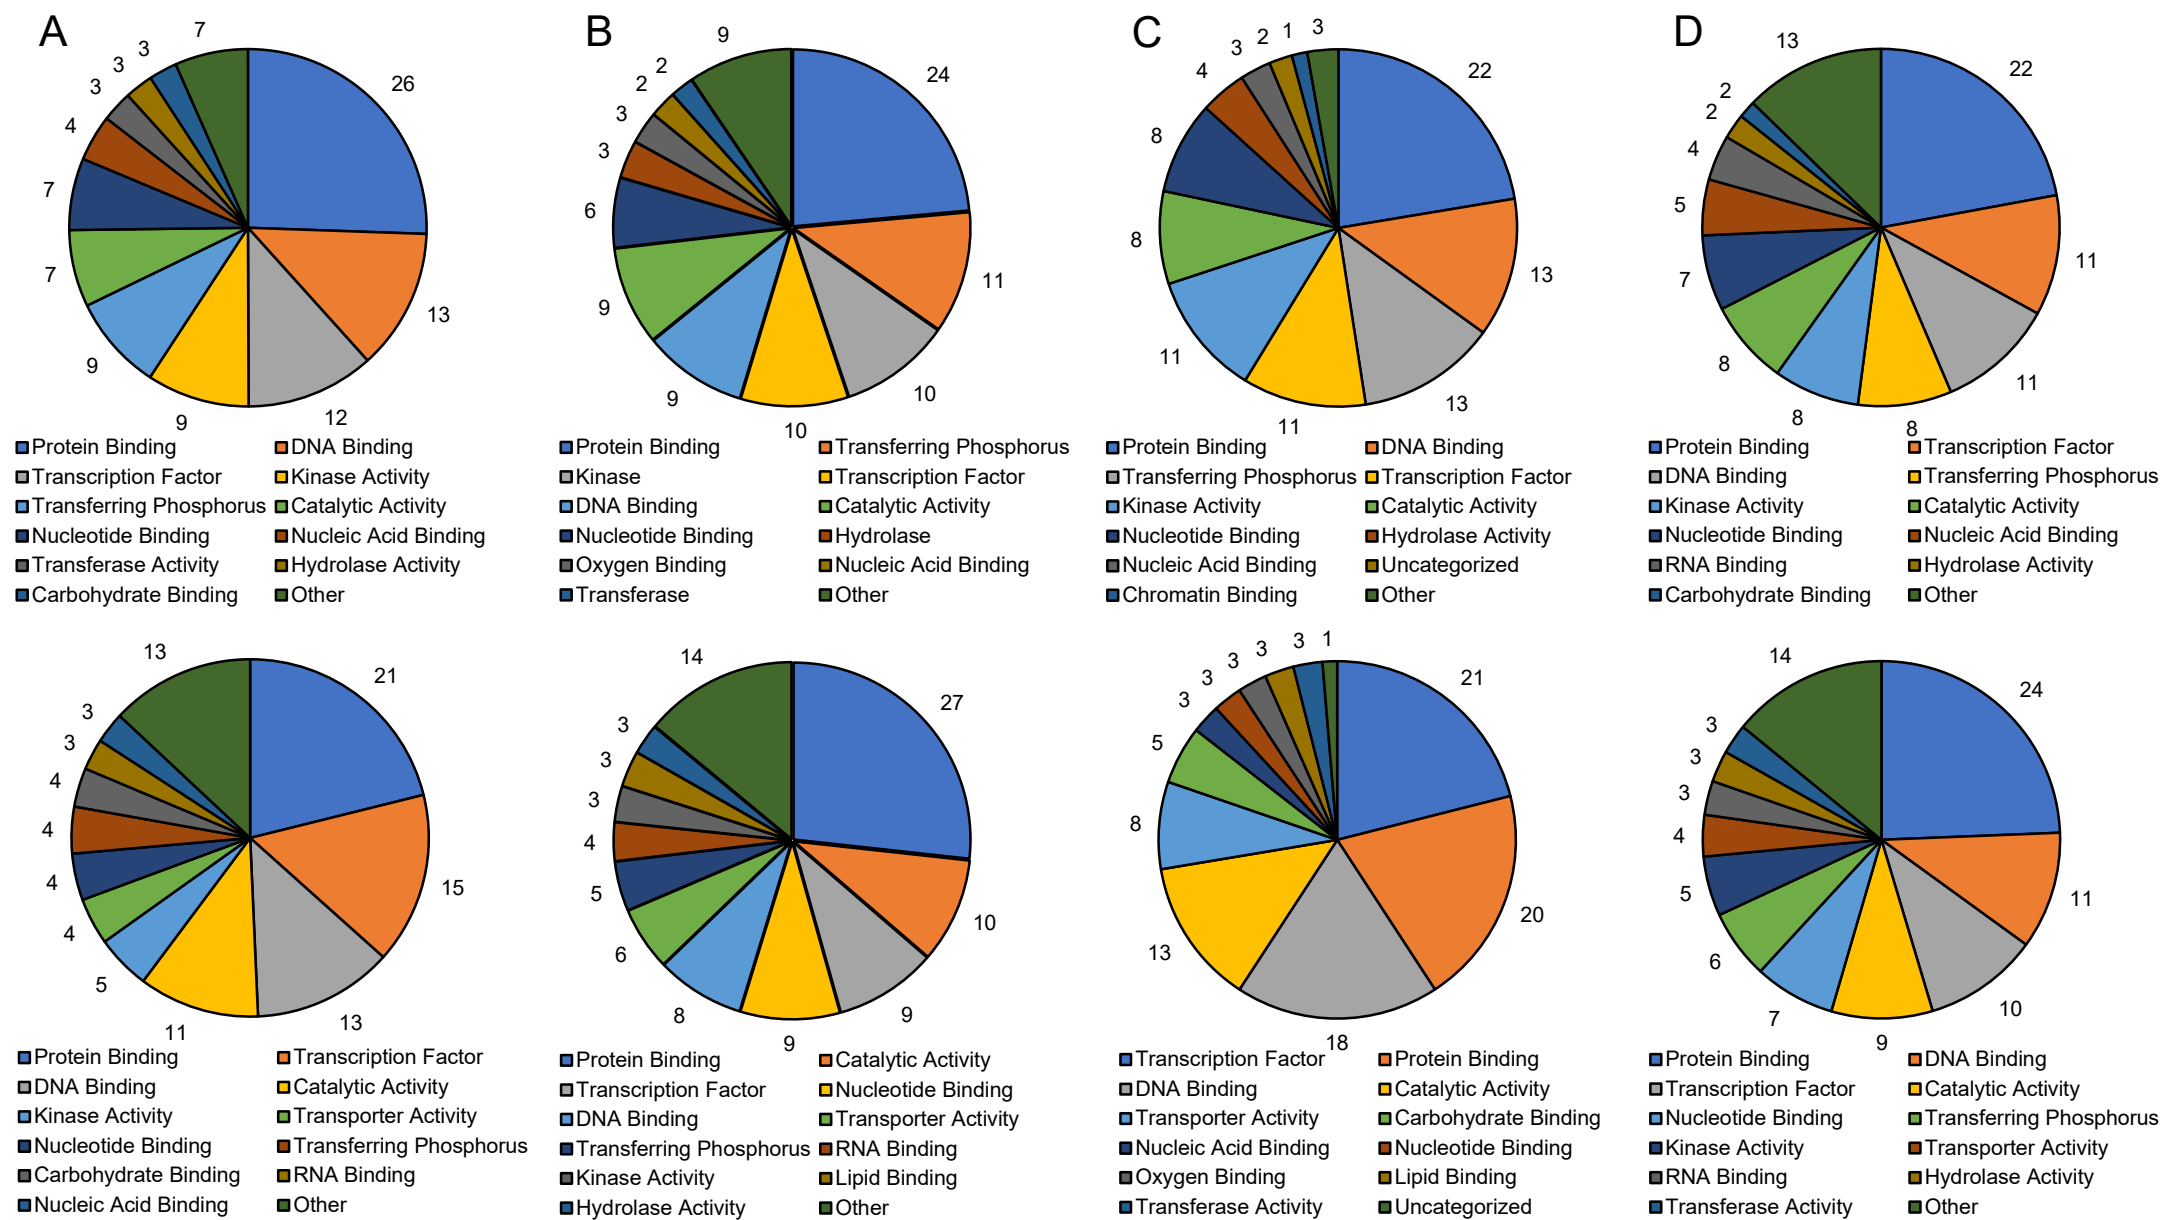

**Supplemental Figure S1.** Ontologies of genes co-regulated and exclusively regulated by WGE. Upregulated (top) and downregulated (bottom) percent ontologies are shown. (A) By WGE and *p35S::GmNAC42-1*. (B) By WGE and *p35S::GmMYB29A2*. (C) By WGE, *p35S::GmNAC42-1*, and *p35S::GmMYB29A2*. (D) By WGE only. Ontology analysis was conducted using the [SoyBase.org](http://SoyBase.org) (Accessed on 20 December 2022) Gene model Data Mining and Analysis tool.
