# Supplementary material for: RNA-Seq Dissects Incomplete Activation of Phytoalexin Biosynthesis by the Soybean Transcription Factors GmMYB29A2 and GmNAC42-1
Source: MDPI journal article supplement (doi:10.3390/plants12030545), 2023-01-25
Supplement: s1 [file s1]

**A**

|           |                                                              | Repeat R2                                           |     |
|-----------|--------------------------------------------------------------|-----------------------------------------------------|-----|
| GmMYB29A2 | MVRAPCCEKMG                                                  | LKKGPWTPPEEDQILMSYIQKHGHGNWRALPKLAGLLRCGKSCRLRWINY  | 60  |
| VvMYB14   | MGRAPCCEKMG                                                  | LKKGPWTPPEEDQILVNYIHLYGHGNWRALPKQAGLLRCGKSCRLRWITNY | 60  |
|           |                                                              | * *****:***:***:*****                               |     |
|           |                                                              | Repeat R3                                           |     |
| GmMYB29A2 | LRPDIKRGNFSEEEETIIKMHELLGNRWSAIAAKLPGRTDNEIKNVWHTHLKKRL      | LNNSD                                               | 120 |
| VvMYB14   | LRPDIKRGNFTSEEEETIIELHERLGNRWSAIAAKLPGRTDNEIKNVWHTHLKKRL     | KHNH                                                | 120 |
|           |                                                              | *****:***** **:*                                    |     |
| GmMYB29A2 | IQKRVSKPRIKRSDSNSSTLTQLEPTSSA-----CT-----TSLSDFSSFSE---      | 162                                                 |     |
| VvMYB14   | ATPPPKRHSLDASQ---VEKQQNPINSATNSRSESLGYGPVLSPPQPSFSDISSAATTTT | 176                                                 |     |
|           |                                                              | .: .: *: . :* :*                                    |     |
| GmMYB29A2 | --GTKNMMDMIKSEDIESVETIMPPIDESFWSEATVDYESSTMMTSNSWTISNELAPPQY | 220                                                 |     |
| VvMYB14   | TTTTATMSDITTPCIKVDSPEDFPEMDENFWSEVLSSNKSGAAG-----DLPGAASGPQL | 231                                                 |     |
|           |                                                              | * .*: . . :* :*:****. . :*: : . : *                 |     |
| GmMYB29A2 | QFNSVESFQQQSVDYNGSNDDHDGMDFWYDIFIKSGESIELPEF                 | 264                                                 |     |
| VvMYB14   | QFPFSPRAVIGSSPY--STYDMDMEFWYNIFTRSGELHELSEI                  | 272                                                 |     |
|           |                                                              | ** * . . .*:***:* :*** ** *:                        |     |

Percent identity: 49.65

Percent similarity: 54.58

**B**

|           |                                                     | Repeat R2           |     |
|-----------|-----------------------------------------------------|---------------------|-----|
| GmMYB29A2 | LKKGPWTPPEEDQILMSYIQKHGHGNWRALPKLAGLLRCGKSCRLRWINY  | LRPDIKRGNFS         | 60  |
| VvMYB14   | LKKGPWTPPEEDQILVNYIHLYGHGNWRALPKQAGLLRCGKSCRLRWITNY | LRPDIKRGNFT         | 60  |
|           |                                                     | *****:***:***:***** |     |
|           |                                                     | Repeat R3           |     |
| GmMYB29A2 | SEEEETIIKMHELLGNRWSAIAAKLPGRTDNEIKNVWHTHLKKRL       |                     | 105 |
| VvMYB14   | SEEEETIIELHERLGNRWSAIAAKLPGRTDNEIKNVWHTHLKKRL       |                     | 105 |
|           |                                                     | ***** **:*          |     |

Percent identity: 88.57

Percent similarity: 89.52

**Supplemental Figure S2.** Similarity and identity among GmMYB29A2 and VvMYB14 amino acid sequences. (A) Full-length amino acid sequences. (B) R2 R3 putative DNA-binding domain sequences. '\*' indicates identical amino acids, ':' amino acids with similar biochemical features.
