# Supplementary material for: RNA-Seq Dissects Incomplete Activation of Phytoalexin Biosynthesis by the Soybean Transcription Factors GmMYB29A2 and GmNAC42-1
Source: Plants (Basel). 2023 Jan 25;12(3):545. doi: 10.3390/plants12030545 (PMC9921300; doi:10.3390/plants12030545)
Supplement: Supplementary file 1 [file plants-12-00545-s001.zip]

Archive with 11 entries (11 files):
- Supplemental Figure S1. Ontologies of co-regulated genes..pdf
- Supplemental Figure S2. Similarity and identity among GmMYB29A2 and VvMYB14 amino acid sequences..pdf
- Supplemental Table S1. Genes commonly upregulated by WGE and p35S-GmMYB29A2.xlsx
- Supplemental Table S2. Genes commonly upregulated by WGE and p35S-GmNAC42-1_.xlsx
- Supplemental Table S3. Genes commonly upregulated by WGE, p35S-GmMYB29A2 and p35S-GmNAC42-1_.xlsx
- Supplemental Table S4. Genes commonly downregulated by WGE and p35S-GmMYB29A2_.xlsx
- Supplemental Table S5. Genes commonly downregulated by WGE and p35S-GmNAC42-1_.xlsx
- Supplemental Table S6. Genes commonly downregulated by WGE, p35S-GmMYB29A2 and p35S-GmNAC42-1_.xlsx
- Supplemental Table S7. Biosynthetic genelist.xlsx
- Supplemental Table S8. Narrowing down glyceollin transcription factor gene candidates_.xlsx
- Supplemental table S9. Primers.xlsx
