# Supplementary material for: RNA-Seq Dissects Incomplete Activation of Phytoalexin Biosynthesis by the Soybean Transcription Factors GmMYB29A2 and GmNAC42-1
Source: Plants (Basel). 2023 Jan 25;12(3):545. doi: 10.3390/plants12030545 (PMC9921300; doi:10.3390/plants12030545)
Supplement: Supplementary file 1 [file plants-12-00545-s001.zip › Supplemental Table S1. Genes commonly upregulated by WGE and p35S-GmMYB29A2.xlsx]

## Sheet: Sheet1
Supplemental Table S1. Genes commonly upregulated by WGE and p35S::GmMYB29A2.
Wm82.a2 (Glyma 2.0)	WGEvsH2O, empty vector log2FoldChange	WGEvsH2O, empty vector adjusted P-value1	p35S::GmMYB29A2vsVector, H2O log2FoldChange	p35S::GmMYB29A2vsVector, H2O adjusted P-value
Glyma.01G004200	1.06875	3.92e-07	0.688856	0.00950201
Glyma.01G004800	1.03402	4.27e-15	0.801032	0.00582539
Glyma.01G006200	0.50139	0.015001	0.499596	0.0340499
Glyma.01G010700	0.813282	0.000963158	1.07351	9.53e-06
Glyma.01G017700	0.75105	1.11e-07	0.572063	0.000737
Glyma.01G056100	1.27517	2.41e-07	1.92339	1.17e-08
Glyma.01G074600	0.570615	1.72e-05	0.471471	0.0354142
Glyma.01G086900	0.784803	2.09e-05	1.14703	8.32e-06
Glyma.01G096000	1.07683	6.72e-06	1.20588	3.49e-07
Glyma.01G105600	0.809779	0.00293525	1.57881	1.65e-07
Glyma.01G106000	0.483191	4.91e-06	0.594475	8.9e-06
Glyma.01G128100	1.92756	1.51e-09	2.08309	8.93e-05
Glyma.01G129100	1.16626	0.00017292	1.99137	1.76e-07
Glyma.01G132300	0.516114	0.00749845	0.681819	0.00640425
Glyma.01G134600	1.93929	9.19e-24	1.94387	8.37e-09
Glyma.01G161100	0.642087	5.28e-08	0.350438	0.015268
Glyma.01G166000	1.49772	5.9e-12	1.44575	3.47e-09
Glyma.01G166100	0.478365	0.00165705	1.10162	3.15e-10
Glyma.01G172700	0.727662	1.1e-12	1.39068	5.01e-06
Glyma.01G172900	1.32901	6.7e-05	1.4662	7.47e-05
Glyma.01G173800	1.5399	4.23e-10	2.09387	0.000683
Glyma.01G181800	0.433218	0.0275612	0.763131	0.000516
Glyma.01G182400	1.02777	3.59e-14	0.646611	0.000556
Glyma.01G185800	0.567279	0.0289378	1.12812	1.26e-05
Glyma.01G187200	0.814033	0.000264709	1.52539	0.000298
Glyma.01G187800	0.825715	0.00624479	0.922587	0.0259705
Glyma.01G202100	1.2293	6.14e-06	1.30086	0.00651136
Glyma.01G210200	0.56416	0.011367	0.762252	0.00321433
Glyma.01G210400	2.66344	6.82e-32	2.91595	6.94e-08
Glyma.01G211800	2.48772	2.83e-21	2.22187	6.33e-05
Glyma.01G229000	0.562142	0.0225378	0.647097	0.00596314
Glyma.01G230200	0.404762	0.0463734	0.383289	0.0300678
Glyma.01G238800	1.49797	4.74e-17	1.14262	3.18e-07
Glyma.01G241700	0.970096	1.83e-07	1.26051	1.28e-06
Glyma.02G005600	0.873208	5.27e-10	1.51649	4.02e-24
Glyma.02G008800	0.405977	0.0249343	1.10502	1.32e-08
Glyma.02G009800	0.934114	3.42e-06	1.67667	1.21e-06
Glyma.02G018300	0.592059	0.0170997	0.605641	0.0054275
Glyma.02G023800	0.734512	0.000551787	1.12508	4.49e-11
Glyma.02G023900	1.18991	2.85e-11	1.33489	8.32e-25
Glyma.02G024200	0.64492	0.000195236	1.85257	7.51e-17
Glyma.02G024600	0.528915	5.42e-06	1.68211	0.00247899
Glyma.02G026300	0.626515	0.000668528	0.581395	0.000152
Glyma.02G026500	0.290873	0.0462281	0.48329	0.000785
Glyma.02G026700	0.251733	0.0248917	0.579841	3.09e-06
Glyma.02G027800	1.58946	2e-13	1.73883	7.59e-09
Glyma.02G029400	1.7964	1.67e-13	1.70856	1.02e-05
Glyma.02G034000	0.551272	0.00838257	1.45095	1.86e-17
Glyma.02G034300	0.415901	0.00311568	0.507053	0.0148492
Glyma.02G035200	0.548092	0.0326832	1.3176	7.93e-07
Glyma.02G035800	0.393766	0.00316699	0.796523	6.91e-09
Glyma.02G038300	0.612597	9.94e-05	0.960633	2.63e-09
Glyma.02G041500	0.407238	0.0156386	1.02576	0.00111135
Glyma.02G041900	0.539389	0.00249443	0.765525	6.3e-06
Glyma.02G042500	1.08615	0.0156328	3.99549	5.92e-06
Glyma.02G044700	0.361331	0.0115291	0.711824	8.76e-07
Glyma.02G047200	0.717366	0.0110581	0.749119	0.0333348
Glyma.02G049700	0.703294	0.00742068	0.837088	0.000139
Glyma.02G049800	0.473138	0.000440627	0.802846	0.000191
Glyma.02G052300	0.397887	0.0300318	1.55171	2.1e-11
Glyma.02G054900	1.15978	0.000288008	2.32446	5.34e-05
Glyma.02G058800	0.438642	0.00834072	0.929226	7.01e-06
Glyma.02G063900	1.59768	1.25e-10	1.58187	0.0110974
Glyma.02G065400	0.28692	0.0161537	0.648108	4.81e-07
Glyma.02G068400	0.676473	0.0257511	0.605103	0.0231333
Glyma.02G072300	0.410784	0.044965	1.03579	3.11e-06
Glyma.02G074100	0.446112	0.0327005	0.478314	0.0247661
Glyma.02G076500	0.260399	0.0338203	0.80207	2.51e-08
Glyma.02G083400	0.486249	0.00697663	0.534612	0.0219861
Glyma.02G088700	2.96323	8.2e-35	2.40178	2.7e-05
Glyma.02G089500	1.34125	3.25e-31	0.655488	0.000428
Glyma.02G091700	0.406658	0.0048566	0.669387	4.68e-05
Glyma.02G095500	0.633372	0.000314782	1.4101	8.72e-13
Glyma.02G100300	0.410698	0.0391765	1.48329	1.06e-14
Glyma.02G104300	0.577402	4.8e-09	0.966585	1.4e-07
Glyma.02G104500	0.726597	9.47e-12	0.519158	0.00615061
Glyma.02G105600	0.642603	0.00254822	1.35832	5e-09
Glyma.02G106700	0.980312	8.66e-15	0.621084	0.000233
Glyma.02G107500	0.714307	3.12e-11	0.524621	0.0107704
Glyma.02G107700	0.333497	0.0200595	0.6685	1.19e-07
Glyma.02G119700	0.294346	0.0275797	0.50663	0.000314
Glyma.02G124700	0.708408	0.0109691	1.30515	0.000961
Glyma.02G130400	0.903773	1.84e-05	1.30267	4.1e-09
Glyma.02G133500	0.381805	0.000123859	0.487885	0.00184637
Glyma.02G134500	1.177	5.76e-21	0.790063	1.39e-07
Glyma.02G136700	0.729689	0.00011219	1.6451	7.68e-13
Glyma.02G136800	0.349161	0.0309643	0.696597	0.000192
Glyma.02G137200	0.77934	0.00218166	0.60246	0.0002
Glyma.02G137700	0.273768	0.0405338	0.863837	1.36e-08
Glyma.02G146000	0.37042	0.0335599	0.873155	6.96e-05
Glyma.02G146100	1.34369	1.59e-06	1.26288	0.0162123
Glyma.02G146500	0.250682	0.0340602	0.56342	0.000135
Glyma.02G147400	0.336071	0.0288977	0.474495	0.024394
Glyma.02G148400	0.324155	0.0181586	1.06396	3.19e-18
Glyma.02G151100	0.37831	0.0140752	0.876361	2.28e-06
Glyma.02G151400	0.306333	0.00360998	0.959506	1.67e-12
Glyma.02G155600	1.41309	1.94e-19	1.3702	2.44e-07
Glyma.02G157800	0.469795	0.00736592	0.370419	0.0418378
Glyma.02G157900	1.48835	4.1e-06	0.677553	0.0206686
Glyma.02G158200	0.74794	0.00501646	0.816365	2.32e-06
Glyma.02G172200	0.839532	1.27e-06	1.56668	7.63e-08
Glyma.02G176700	0.457107	0.0487053	0.614586	0.00402722
Glyma.02G187200	0.70175	5.3e-06	2.50889	6.44e-27
Glyma.02G193200	0.337967	0.00278463	1.02134	2.46e-15
Glyma.02G195300	1.14119	5.29e-13	2.7456	7.8e-25
Glyma.02G197300	0.519219	0.0485936	0.945395	0.00293896
Glyma.02G213900	0.456167	0.0100045	0.822871	0.000132
Glyma.02G214400	0.443436	0.030313	0.834007	9.03e-05
Glyma.02G217600	0.529149	0.000854872	0.817981	2.28e-07
Glyma.02G220400	0.553395	0.00136691	0.821652	2.74e-07
Glyma.02G220700	0.361534	0.00850994	0.798824	1.09e-07
Glyma.02G224200	0.730513	0.00119366	0.42283	0.0383398
Glyma.02G225000	0.420221	0.0163193	0.433013	0.0144074
Glyma.02G227000	0.392212	0.0147963	0.856407	2.74e-10
Glyma.02G230200	0.394473	0.0162689	0.596888	0.0190245
Glyma.02G233000	0.658923	0.000444814	0.867707	0.000316
Glyma.02G234300	0.599902	0.00312991	0.73539	0.00792358
Glyma.02G235700	0.382077	0.0450726	1.43359	1.56e-30
Glyma.02G235800	0.412791	0.000921007	0.428426	0.00153763
Glyma.02G238100	0.412309	0.0281109	0.859367	4.16e-06
Glyma.02G238400	0.382656	0.0288399	0.747825	0.000117
Glyma.02G239100	0.900323	2.67e-07	1.62411	1.24e-14
Glyma.02G239800	2.14663	5.89e-15	2.46355	1.09e-05
Glyma.02G241900	0.25832	0.0353297	0.509419	0.00124712
Glyma.02G242900	0.953079	0.00915716	3.14282	1.78e-08
Glyma.02G243400	0.459376	0.0314622	0.549005	0.0200876
Glyma.02G246000	0.704205	0.00793319	2.07144	3.75e-06
Glyma.02G247600	0.270443	0.0497695	0.863929	1.43e-06
Glyma.02G247900	1.04811	8.34e-09	0.681907	0.0228356
Glyma.02G256300	0.406824	0.00132474	0.775265	9.91e-07
Glyma.02G257700	1.33783	1.55e-06	2.1181	0.0210718
Glyma.02G260500	0.30176	0.00311337	0.66384	6.16e-05
Glyma.02G261900	0.452875	0.0147594	0.564939	0.000268
Glyma.02G265900	1.37292	6.93e-06	1.19136	0.00312604
Glyma.02G267400	0.380827	0.0127612	0.819621	2.36e-06
Glyma.02G268200	1.53176	9.46e-16	1.40227	2.89e-15
Glyma.02G280000	0.363054	0.01912	0.388714	0.0239687
Glyma.02G284300	1.67725	3.02e-07	2.39642	0.00242859
Glyma.02G288500	0.78371	0.0144414	1.37624	6.83e-07
Glyma.02G293200	0.405664	0.00196999	0.567154	0.000215
Glyma.02G295200	0.421698	0.000864397	0.658283	5.2e-06
Glyma.02G295500	0.361054	0.0441147	0.76239	0.000362
Glyma.02G303700	0.246539	0.0410921	0.688723	8.81e-05
Glyma.02G307300	1.81054	3e-23	0.958018	4.24e-07
Glyma.02G309300	0.474977	0.000224773	0.909392	1.02e-08
Glyma.02G311200	0.307425	0.0287981	0.975292	3.02e-15
Glyma.03G024200	0.685482	0.0198013	1.35768	0.0161162
Glyma.03G042700	2.34718	1.86e-16	1.89823	0.000123
Glyma.03G044900	4.00013	2.98e-68	4.74194	3.45e-07
Glyma.03G059200	0.592445	0.00918243	0.734673	0.000678
Glyma.03G073200	2.10804	2.98e-15	1.27412	0.00879741
Glyma.03G079200	0.569719	0.00923202	1.40253	8.93e-05
Glyma.03G088800	0.689939	0.00262846	0.948518	0.0159824
Glyma.03G120700	0.464418	0.000167745	0.459585	0.0488483
Glyma.03G134800	0.921555	0.00222902	1.68025	1.6e-09
Glyma.03G149400	0.444382	0.00389069	0.457048	0.0209448
Glyma.03G157800	1.19399	2.41e-06	1.89137	4.96e-07
Glyma.03G160100	1.15405	7.64e-08	2.79685	2.53e-11
Glyma.03G160200	0.846694	6.56e-12	1.06202	3.42e-05
Glyma.03G161000	0.482753	0.0122507	0.576627	0.000786
Glyma.03G171500	1.03575	0.000661331	1.92234	9.89e-13
Glyma.03G186300	0.75029	1.99e-06	0.585419	0.00348188
Glyma.03G201500	1.24	0.000659887	3.07193	3.43e-06
Glyma.03G202600	1.25914	1.7e-11	0.685818	0.0164859
Glyma.03G216300	0.818675	0.0474101	0.808933	0.00572507
Glyma.03G228900	0.422944	0.00144571	0.374598	0.0108297
Glyma.03G233800	1.32243	0.00153784	3.68392	0.000557
Glyma.03G236300	0.483817	0.000332599	0.844502	3.5e-06
Glyma.03G236600	1.43337	1.9e-08	0.721488	0.0459033
Glyma.03G241500	0.691438	5.77e-06	0.839195	0.000301
Glyma.03G247500	3.83913	3.47e-55	3.51706	8.84e-23
Glyma.03G263000	0.621754	0.0408848	1.47854	5.63e-07
Glyma.04G001200	0.436323	0.0286218	0.394971	0.0291551
Glyma.04G001400	0.330634	0.0355604	0.342628	0.0363844
Glyma.04G032100	0.772996	0.00275085	0.502473	0.015087
Glyma.04G034500	0.433961	0.00876418	0.572834	0.00188982
Glyma.04G036600	2.68648	7.55e-20	1.68396	0.0233748
Glyma.04G052600	0.404151	0.0498299	1.36468	2.09e-09
Glyma.04G075400	0.436487	0.00450353	0.631294	0.0182464
Glyma.04G075700	0.734426	0.00129755	0.523216	0.0387729
Glyma.04G079300	1.69828	2.31e-29	0.967663	1.17e-06
Glyma.04G079400	1.22409	8.17e-14	0.823015	0.000317
Glyma.04G086700	1.78463	5.11e-19	1.20402	0.0410841
Glyma.04G107500	0.329037	0.00783904	0.717452	0.00134109
Glyma.04G121100	0.59869	4.97e-07	0.536325	0.0124171
Glyma.04G123100	0.804616	9.62e-06	0.477905	0.0460739
Glyma.04G129200	1.11291	8.75e-15	1.22749	9.71e-05
Glyma.04G138600	0.690834	0.0226305	0.78961	0.0259775
Glyma.04G165400	1.2376	9.14e-08	1.32795	0.000328
Glyma.04G179300	0.62289	0.000571516	0.479216	0.0420738
Glyma.04G195300	0.713532	0.000555815	0.586752	0.00955661
Glyma.04G195700	0.671585	0.000267398	0.990106	0.000489
Glyma.04G203100	0.565232	0.00818454	0.72635	0.0109495
Glyma.04G212100	0.935571	0.00363667	0.948815	0.00364653
Glyma.04G232200	0.892423	3.2e-06	0.746538	0.00778122
Glyma.04G247600	0.768583	0.00469487	1.03197	0.0117777
Glyma.05G022100	2.53388	1.44e-17	3.53327	1.1e-10
Glyma.05G030800	0.616517	0.00213414	0.54367	0.0413827
Glyma.05G033600	2.16638	4.57e-14	2.31648	0.000431
Glyma.05G045700	0.6955	5.19e-06	0.52042	0.00496444
Glyma.05G052800	0.650281	0.0278679	1.18677	4.91e-05
Glyma.05G055000	0.96867	9.08e-10	0.422269	0.0261021
Glyma.05G055600	0.387104	0.0171648	0.569417	0.0096073
Glyma.05G068600	0.489814	0.0160131	0.97821	4.39e-08
Glyma.05G082400	0.803449	0.000606665	0.72748	0.000128
Glyma.05G097100	0.48676	0.000336954	0.421026	0.00941661
Glyma.05G124800	0.931136	7.03e-06	0.857587	0.00184521
Glyma.05G136100	0.94751	0.0169452	2.03203	0.0172666
Glyma.05G147000	2.36442	2.85e-10	5.73	5.77e-13
Glyma.05G148100	0.530643	0.00260263	0.591774	0.0069867
Glyma.05G154700	0.279033	0.0493205	0.465518	0.0259483
Glyma.05G159200	0.743336	0.0244553	0.857593	0.02153
Glyma.05G161400	0.566577	0.0398863	1.79561	6.14e-06
Glyma.05G161600	0.821856	3.9e-05	0.903956	0.00145798
Glyma.05G212600	1.00707	0.00221209	2.43096	2.94e-08
Glyma.05G215900	0.913559	1.97e-07	1.51866	1.28e-11
Glyma.05G234600	0.869604	8.01e-05	1.01092	0.0122133
Glyma.05G235200	0.503418	0.0296582	0.627402	0.0267092
Glyma.06G000700	0.331358	0.0464725	0.694125	0.000103
Glyma.06G003100	2.88079	5.69e-27	1.78435	0.00831077
Glyma.06G014600	0.547061	0.00331211	0.62094	0.006354
Glyma.06G036400	0.419114	0.00174887	0.45723	0.0191503
Glyma.06G036700	2.72233	1.27e-21	2.33671	0.0191767
Glyma.06G037000	1.49615	4.32e-20	0.584903	0.0436901
Glyma.06G042100	1.34924	1.58e-08	0.759124	0.022816
Glyma.06G053000	0.306656	0.0387045	0.753639	0.000213
Glyma.06G076600	0.555309	0.0100183	0.826237	9.42e-05
Glyma.06G079500	0.897675	0.0428512	2.37071	3.62e-05
Glyma.06G089100	0.665214	0.0022441	0.925137	0.00882726
Glyma.06G091400	0.291843	0.0164378	0.385946	0.0252935
Glyma.06G099800	0.739299	0.00613597	1.3707	0.0116857
Glyma.06G102300	1.03389	5.35e-08	1.51098	8.39e-15
Glyma.06G106100	1.68036	9.19e-24	0.672248	0.0276713
Glyma.06G108100	0.307681	0.0451652	0.713497	1.25e-05
Glyma.06G119300	0.444919	0.0269607	0.987851	1.9e-08
Glyma.06G123800	0.452975	0.046754	0.6518	0.0128602
Glyma.06G129100	0.380314	0.0148885	0.478282	0.00568408
Glyma.06G135000	0.536673	0.028968	0.763157	0.00261825
Glyma.06G148400	0.873636	0.0496181	2.15026	0.0102887
Glyma.06G157400	0.395048	0.00268091	0.834638	0.0001
Glyma.06G162300	0.671312	0.0152811	1.30333	0.002878
Glyma.06G162400	0.559604	0.00356481	1.20227	1.36e-12
Glyma.06G220700	0.979145	0.000341983	1.22598	0.0375117
Glyma.06G249400	2.27906	5.23e-15	1.40065	0.00676666
Glyma.06G255900	0.57441	0.0101972	1.00128	3.47e-06
Glyma.06G260200	1.35966	0.00014749	3.18377	2.71e-08
Glyma.06G260900	0.604989	0.0161446	1.0572	0.0182496
Glyma.06G295400	1.6568	2.5e-22	2.21427	1.08e-11
Glyma.06G307700	0.561776	0.00392646	1.07466	3.53e-05
Glyma.06G308800	0.501099	0.000269301	0.597	2.58e-05
Glyma.06G310800	0.577694	0.00310076	0.664173	0.0445041
Glyma.06G315100	0.901771	3.81e-13	0.358782	0.0372561
Glyma.06G319500	0.744475	8.09e-08	1.49174	8.44e-18
Glyma.07G004600	0.713704	0.00242294	0.493751	0.0253112
Glyma.07G021300	0.689217	8.32e-05	0.938772	2.06e-05
Glyma.07G023300	1.23814	8.6e-20	1.06919	3.12e-08
Glyma.07G025200	0.308033	0.0351243	0.383037	0.0312941
Glyma.07G034400	1.17036	8.24e-07	0.710365	0.0451144
Glyma.07G037000	0.949629	1.7e-10	0.812445	0.0020889
Glyma.07G039700	1.11427	0.000475263	1.51207	0.00251095
Glyma.07G045700	0.534263	0.0394202	1.38221	5.12e-08
Glyma.07G057400	0.771846	7.05e-12	0.796748	3.7e-05
Glyma.07G066500	0.276126	0.0163193	0.330903	0.0173913
Glyma.07G068700	0.433997	0.00727794	0.478593	0.0160884
Glyma.07G072600	0.908776	0.00235605	1.74228	0.0113526
Glyma.07G073800	1.06694	0.00116741	1.5381	0.00699244
Glyma.07G077600	0.746677	0.0022892	0.839032	0.0141918
Glyma.07G079600	2.22336	8.19e-12	3.16847	1.92e-05
Glyma.07G083900	1.53294	1.37e-08	4.10387	1.19e-34
Glyma.07G091800	0.495243	0.00339812	0.65822	1.83e-07
Glyma.07G092000	0.667495	0.00652102	1.24134	0.0229719
Glyma.07G125500	0.934261	0.0104154	0.821694	0.0232279
Glyma.07G139200	0.727598	6.73e-08	0.731771	3.08e-05
Glyma.07G139700	0.698612	0.00380344	3.28431	3.18e-23
Glyma.07G141300	0.725867	0.000419756	1.54743	7.82e-07
Glyma.07G142000	0.660054	0.000314782	0.589	0.00971176
Glyma.07G147700	0.790256	0.00868987	3.66129	1.41e-101
Glyma.07G148100	0.277389	0.0373214	0.443499	0.00914169
Glyma.07G153200	1.17889	0.00382465	2.24362	0.00217538
Glyma.07G163200	0.583504	0.00175882	1.06957	1.49e-06
Glyma.07G173000	0.651223	1.41e-09	0.578411	0.00172097
Glyma.07G177600	1.37208	7.02e-09	0.842402	0.00140708
Glyma.07G190100	0.709699	8.05e-05	1.004	0.000493
Glyma.07G197100	1.06065	0.00648469	2.70255	9.97e-12
Glyma.07G216600	0.981323	8.69e-07	0.440293	0.0077135
Glyma.07G221800	0.515397	0.00536328	0.463676	0.00822291
Glyma.07G227600	0.63561	0.0409739	1.75775	0.00144269
Glyma.07G235900	1.28462	4.64e-10	0.840244	0.0321951
Glyma.07G236000	0.750608	3.41e-07	0.512584	0.0198409
Glyma.07G242000	0.609027	9e-06	0.34782	0.0476153
Glyma.07G242100	1.0086	3.44e-08	0.481655	0.0326158
Glyma.07G243500	2.80188	4.7e-57	1.48121	8.87e-32
Glyma.07G257700	0.75916	1.16e-13	0.482257	0.00172979
Glyma.07G261500	0.566533	4.7e-05	0.670206	0.0027217
Glyma.07G265600	0.444413	0.00329965	0.366686	0.0465116
Glyma.08G004300	0.839783	7.13e-09	0.655946	0.000365
Glyma.08G004800	0.427612	0.0180554	0.422904	0.0143814
Glyma.08G010400	2.2274	6.29e-13	1.54949	0.0308383
Glyma.08G012000	0.338197	0.0154861	0.337594	0.0345643
Glyma.08G015700	1.176	1.65e-17	0.797851	0.000243
Glyma.08G016300	0.43538	0.0261866	0.659154	0.00553364
Glyma.08G042100	1.63162	5.43e-08	2.02605	8.39e-05
Glyma.08G058400	0.631087	0.00118386	0.406331	0.0303614
Glyma.08G079100	1.43707	2.99e-09	1.03456	3.86e-05
Glyma.08G079200	1.41659	1.83e-12	1.07255	0.000395
Glyma.08G091400	2.15437	9.57e-09	2.6977	0.00307647
Glyma.08G091500	1.52826	0.000184433	1.52466	0.0417206
Glyma.08G091900	0.531321	0.0378158	1.20201	1.57e-07
Glyma.08G099800	0.884615	0.0387619	1.63922	0.0467624
Glyma.08G107500	1.99197	1.28e-11	1.8021	0.000456
Glyma.08G109500	0.620244	0.00298013	0.74977	0.000436
Glyma.08G118700	1.0846	1.2e-08	1.14004	1.22e-06
Glyma.08G133100	0.722315	0.0388854	1.61536	1.71e-05
Glyma.08G140600	1.89298	3.89e-33	1.36898	0.000895
Glyma.08G174900	3.21781	1.52e-66	4.86436	1.28e-18
Glyma.08G175200	0.72724	4.26e-20	1.38566	6.32e-07
Glyma.08G178100	0.856441	4.45e-06	0.674012	0.000582
Glyma.08G187400	0.613406	0.000131798	0.42845	0.00977957
Glyma.08G189200	1.14774	6.19e-06	1.5807	2.93e-05
Glyma.08G189500	1.06667	6.84e-10	0.5628	0.0125297
Glyma.08G191300	1.11786	0.00137149	1.20604	0.0217817
Glyma.08G204300	0.332301	0.0357048	0.715775	0.000111
Glyma.08G211900	0.356397	0.0172657	0.447108	0.0221516
Glyma.08G218600	0.873017	9.83e-09	0.714676	1.79e-07
Glyma.08G220500	0.509907	0.0466332	0.880947	0.000252
Glyma.08G235900	1.07317	4.13e-19	0.503129	0.00211959
Glyma.08G239500	0.379728	0.0253052	0.576368	0.00444523
Glyma.08G244800	1.33817	7.07e-18	1.02447	5.94e-08
Glyma.08G246700	0.467054	0.0156028	0.859763	4.22e-06
Glyma.08G277000	2.43602	2.19e-45	1.72014	2.43e-17
Glyma.08G277100	1.20145	3.81e-06	1.19026	0.000594
Glyma.08G292000	1.69538	9.3e-18	1.44767	4.24e-06
Glyma.08G298900	0.910543	9.5e-06	0.533128	0.00349582
Glyma.08G303800	0.677608	0.00084005	0.909092	0.00334254
Glyma.08G305000	0.734937	0.0250441	1.36294	4.83e-06
Glyma.08G306800	0.917385	7.84e-11	0.655886	0.00120627
Glyma.08G307600	0.450658	0.0125312	0.75667	0.000366
Glyma.08G316000	0.94901	7.44e-05	0.723153	0.011466
Glyma.08G334100	0.461166	0.00427768	0.707072	0.0197609
Glyma.08G336800	1.10857	3.23e-13	0.419761	0.0296357
Glyma.08G341100	2.88087	1.49e-20	1.9232	0.0123771
Glyma.08G341400	0.677721	0.000809484	0.425677	0.0282662
Glyma.08G352500	0.742197	0.000291088	1.19449	3.72e-06
Glyma.08G353600	0.502331	6.73e-05	0.544818	1.69e-05
Glyma.08G355600	0.400842	0.000922186	0.454017	0.000337
Glyma.08G364700	2.88961	3.74e-27	1.62747	0.0010663
Glyma.09G000600	0.470608	0.0192917	0.587443	0.0252183
Glyma.09G018400	0.715552	0.00136691	0.777623	0.00762629
Glyma.09G035400	0.339439	0.0184601	0.560208	0.00175252
Glyma.09G040500	1.48281	1.12e-10	2.04263	2.7e-10
Glyma.09G045600	1.27094	2.18e-07	0.662953	0.000739
Glyma.09G046400	0.841883	0.015567	1.87317	1.63e-28
Glyma.09G048900	3.68744	4.39e-50	3.63354	2.56e-28
Glyma.09G049200	3.81783	6.31e-72	3.03556	2.65e-39
Glyma.09G049300	3.76062	2.19e-45	2.29521	0.000657
Glyma.09G054200	0.438888	0.0284399	0.763481	0.00077
Glyma.09G059400	0.323825	0.0476559	0.502179	0.0231161
Glyma.09G063300	0.940282	0.000281133	2.36235	4.57e-13
Glyma.09G064200	1.06595	0.0019387	1.83466	0.0284614
Glyma.09G065000	0.739963	3.84e-09	0.645909	0.00021
Glyma.09G066800	0.658512	0.00257733	0.961714	0.00134143
Glyma.09G068100	0.931005	1.98e-05	0.601728	0.00520442
Glyma.09G089700	0.234866	0.0397118	0.634508	9.7e-05
Glyma.09G115600	0.558563	0.0243348	1.78144	3.71e-24
Glyma.09G115800	0.750874	4.64e-05	0.718406	0.000124
Glyma.09G120600	0.838827	2.6e-07	0.555538	0.0457695
Glyma.09G142100	0.373047	0.0340602	0.578556	0.00274249
Glyma.09G145400	1.05567	1.44e-15	0.875244	4.72e-05
Glyma.09G151400	2.37595	1.96e-48	0.709121	0.0156621
Glyma.09G157900	0.391532	0.0296639	0.621171	0.0208084
Glyma.09G161100	1.5939	1.39e-20	0.650347	0.00562068
Glyma.09G172100	1.11345	0.00428562	2.12377	0.000187
Glyma.09G173200	1.19932	7.95e-07	0.702079	0.000697
Glyma.09G181300	0.468338	0.0100235	0.771488	0.000163
Glyma.09G185200	0.440166	0.0294928	0.65069	5.66e-05
Glyma.09G201200	0.876284	0.0173232	3.40638	0.000277
Glyma.09G203200	0.750626	0.000195161	0.824044	0.00816924
Glyma.09G205300	0.446698	0.00936692	0.860386	0.000339
Glyma.09G205700	1.04317	2.73e-13	0.749851	5.34e-06
Glyma.09G209400	1.10722	8.56e-09	0.648382	0.0139819
Glyma.09G210400	0.51828	0.0405338	0.714019	0.0269108
Glyma.09G210600	0.304407	0.0196895	0.921681	1.72e-10
Glyma.09G225400	1.16676	0.00016865	1.0732	0.0383107
Glyma.09G227900	0.691327	1.94e-05	0.704163	0.00143085
Glyma.09G238100	0.97846	9.45e-05	0.729207	0.0176529
Glyma.09G255000	0.999726	0.0291026	1.7279	0.00193097
Glyma.09G269400	2.25996	7.94e-09	4.54607	8.39e-05
Glyma.09G270500	0.44229	1.81e-05	0.405377	0.00559201
Glyma.09G275100	0.618005	0.000126263	0.542679	0.0354142
Glyma.09G277000	0.864299	1.94e-07	0.503242	0.00843847
Glyma.09G281800	2.46792	1.54e-15	1.68829	1.63e-17
Glyma.10G005400	1.82289	2.64e-14	1.8982	7.74e-09
Glyma.10G006600	2.48349	1.66e-17	1.79389	0.0138664
Glyma.10G007000	0.74689	0.000882521	1.32863	7.47e-05
Glyma.10G010400	1.40974	0.000315986	1.71647	0.0208372
Glyma.10G014200	0.769462	4.8e-09	0.389151	0.00533971
Glyma.10G019000	0.321791	0.00107087	0.446841	0.0434424
Glyma.10G022900	0.479489	0.0040122	0.403073	0.0164112
Glyma.10G023300	1.32113	3.62e-06	1.595	0.00877604
Glyma.10G023400	0.509062	0.0126501	0.668497	0.03375
Glyma.10G024200	0.393693	0.0175068	0.628973	0.00711489
Glyma.10G025700	0.734923	0.00530847	1.01676	0.00406743
Glyma.10G030000	0.367295	0.0158598	0.593188	0.000488
Glyma.10G031600	0.377151	0.0355786	0.67685	0.00166777
Glyma.10G046900	0.719188	0.000809317	1.5226	2.78e-08
Glyma.10G047700	0.325443	0.0310942	0.779483	0.00432394
Glyma.10G066300	0.406096	0.0141611	0.522516	0.0132936
Glyma.10G070900	0.412506	0.0309657	0.541839	0.0479677
Glyma.10G073600	0.717454	9.5e-06	0.636726	0.00208602
Glyma.10G107900	1.63845	1.15e-07	1.5519	0.00511988
Glyma.10G132300	0.693876	8.33e-07	0.760412	0.000271
Glyma.10G144800	0.50007	1.15e-05	0.443928	0.0208903
Glyma.10G156500	1.10302	7.08e-16	1.46855	2.3e-06
Glyma.10G161500	2.05341	2.31e-07	3.61123	2.51e-06
Glyma.10G180800	0.830432	2.65e-05	0.911955	2.84e-07
Glyma.10G184700	2.78609	5.65e-31	2.32377	3.66e-11
Glyma.10G189300	0.74934	0.00541692	1.20287	0.00591287
Glyma.10G192900	0.422648	0.000434403	1.3204	4.95e-09
Glyma.10G200700	0.653834	0.000195236	1.09225	3.2e-05
Glyma.10G213000	2.69916	3.62e-28	1.007	0.0223888
Glyma.10G239700	0.828147	0.0396551	2.20954	0.000797
Glyma.10G245300	0.455266	0.03065	1.31228	2.1e-08
Glyma.10G248000	0.561375	0.000624072	0.399131	0.0162634
Glyma.10G253000	0.855601	6.47e-06	0.777605	8.42e-06
Glyma.10G257900	0.592563	0.00037331	0.752051	2.62e-05
Glyma.10G259400	0.350943	0.0293659	0.959155	4.59e-05
Glyma.10G263300	0.30215	0.0186476	0.345887	0.021155
Glyma.10G277900	0.311988	0.0299649	0.39041	0.024394
Glyma.10G281600	1.60358	1.61e-27	1.01567	1.36e-09
Glyma.10G294900	0.308541	0.0146583	0.416386	0.00780021
Glyma.10G295300	2.51225	2.29e-99	1.17542	7.79e-07
Glyma.11G000800	1.06941	9.8e-15	0.87761	0.00463222
Glyma.11G001200	0.780554	0.000362959	1.30491	2.16e-08
Glyma.11G008900	0.494267	0.00497706	1.12057	6.16e-05
Glyma.11G009300	0.29229	0.0436302	0.565814	0.00133151
Glyma.11G021400	0.408202	0.00473219	0.625353	2.58e-05
Glyma.11G022800	0.812183	0.0327841	2.90957	0.000621
Glyma.11G025600	0.905655	1.56e-06	1.4829	4.57e-07
Glyma.11G036500	0.647564	0.00491225	0.483933	0.00959756
Glyma.11G051800	2.93662	6.15e-37	2.68659	1.05e-09
Glyma.11G053300	0.407422	0.00648334	0.518143	0.00039
Glyma.11G058100	1.17192	0.00119682	1.22595	2.66e-05
Glyma.11G062500	3.18266	2.78e-23	4.48072	6.19e-10
Glyma.11G062600	3.0336	3.65e-51	2.29649	3.24e-24
Glyma.11G070200	1.80255	1.18e-26	0.440165	8.68e-05
Glyma.11G070600	1.74292	3.33e-24	1.49646	1.67e-07
Glyma.11G071100	1.50284	4.47e-08	1.68215	0.00242534
Glyma.11G103800	0.404154	0.0112508	0.446132	0.0367079
Glyma.11G108000	0.331593	0.0213237	0.777079	0.0162742
Glyma.11G109100	0.686404	0.0305683	0.464609	0.0268371
Glyma.11G111700	0.686015	0.000397534	1.09677	0.000586
Glyma.11G114500	0.457074	0.045713	0.96587	0.00568408
Glyma.11G118100	0.515583	0.0397118	0.635505	0.0172318
Glyma.11G120900	0.46454	0.0211786	0.888967	0.000151
Glyma.11G129300	1.42271	2.56e-05	2.65628	0.00200186
Glyma.11G129500	1.21352	0.00077091	2.34801	2.56e-06
Glyma.11G129600	0.930729	0.048043	2.10055	0.000294
Glyma.11G129900	1.41876	3.95e-10	1.63625	4.41e-05
Glyma.11G154700	0.576706	0.0105926	1.43212	0.000645
Glyma.11G163200	1.26898	0.000408582	1.50814	0.0194896
Glyma.11G180500	0.435422	0.0011368	0.448887	0.0339942
Glyma.11G181200	0.92182	0.000323263	1.14833	0.000759
Glyma.11G189400	0.95261	0.000473541	1.42993	3.51e-07
Glyma.11G192800	0.820917	7.91e-07	0.915888	0.00789238
Glyma.11G217800	0.868402	0.0123814	1.42218	0.0120373
Glyma.11G219500	0.560337	6e-05	0.446833	0.00673727
Glyma.11G229100	0.646965	1.38e-07	0.69151	0.00374152
Glyma.11G232200	0.506348	0.001649	0.574617	0.00161971
Glyma.11G236600	1.30429	1.39e-11	1.81304	1.36e-10
Glyma.11G243500	1.09284	5.24e-07	0.739064	0.00927619
Glyma.11G243600	0.325379	0.0178984	0.371871	0.0256263
Glyma.11G243900	0.582703	0.000219773	0.693006	0.000551
Glyma.11G252700	1.18009	2.91e-18	0.611348	0.000858
Glyma.12G001000	0.929283	0.00251453	1.11021	0.042822
Glyma.12G008700	0.875084	0.000107945	1.21477	5.04e-06
Glyma.12G020900	0.888197	1.22e-09	0.862402	0.00304538
Glyma.12G021300	0.860305	0.0347619	2.73954	1.28e-09
Glyma.12G022500	0.369644	0.0052801	0.425492	0.0132548
Glyma.12G031700	0.531779	0.00472388	0.82938	0.000735
Glyma.12G032900	0.398076	0.00477115	0.788516	0.000383
Glyma.12G046000	0.418391	0.0415131	0.557324	0.00109547
Glyma.12G047000	0.714133	0.0327841	1.07784	0.0332884
Glyma.12G054100	1.52793	1.78e-06	1.78045	0.000232
Glyma.12G054200	1.58915	2.16e-12	3.03485	6.31e-20
Glyma.12G084900	0.7122	0.0104631	0.775487	0.00146959
Glyma.12G093100	0.41673	0.0291258	0.882215	0.000322
Glyma.12G094100	0.464973	0.000157245	0.877214	3.99e-05
Glyma.12G110100	1.75133	1.71e-20	2.45833	3.8e-11
Glyma.12G120300	0.801373	5.73e-06	0.382076	0.0323294
Glyma.12G137700	1.64219	9.47e-10	1.17917	0.00636067
Glyma.12G158600	0.815613	0.00395149	0.923646	0.00567122
Glyma.12G173200	0.851473	2.6e-07	0.686039	0.00146936
Glyma.12G184500	0.472472	0.000214587	0.525188	0.0197613
Glyma.12G185400	0.539691	0.0340898	0.739927	0.0450974
Glyma.12G203700	0.506335	0.0309277	0.869903	0.000663
Glyma.12G207400	0.659822	0.0049162	2.21947	6.41e-12
Glyma.12G212400	0.325055	0.0363118	0.37737	0.0398162
Glyma.12G218500	1.11829	1.35e-05	1.00702	0.0104398
Glyma.12G221500	0.593224	0.0186864	0.887779	0.0219861
Glyma.12G225200	0.507011	0.00504013	0.973292	0.000966
Glyma.12G233000	0.788584	0.0316189	1.61122	0.0125955
Glyma.12G241300	0.619295	0.000484461	0.596427	0.00630216
Glyma.13G003200	0.323869	0.0115341	1.26539	1.49e-13
Glyma.13G032100	0.705652	0.000410683	0.651531	0.00895991
Glyma.13G036600	0.665134	0.0120798	0.885018	0.00338861
Glyma.13G037000	0.484403	0.00497319	1.73814	4.52e-11
Glyma.13G037100	0.420014	0.0431534	0.906015	0.000122
Glyma.13G072800	0.411201	0.00567951	0.546616	0.000661
Glyma.13G082200	0.253409	0.0344488	0.678635	7.45e-05
Glyma.13G092500	0.781946	0.00329314	1.0319	0.019798
Glyma.13G093300	2.77103	1.27e-21	1.76707	0.000504
Glyma.13G095700	1.00691	0.000517885	2.32718	5.52e-10
Glyma.13G099800	0.371382	0.00534388	0.638651	0.00503051
Glyma.13G100300	0.690786	1.62e-05	0.524757	0.00430173
Glyma.13G109800	1.26661	3.11e-25	2.6045	8.46e-05
Glyma.13G118300	0.434517	0.0236745	0.972518	1.43e-05
Glyma.13G129000	0.903383	7.53e-08	0.609114	0.0079949
Glyma.13G140200	1.52224	7.69e-13	1.20726	0.00850223
Glyma.13G150200	0.396139	0.0134617	0.58444	0.00866807
Glyma.13G157400	1.47498	5.37e-18	0.901308	0.000629
Glyma.13G161700	0.313408	0.020748	0.495031	0.000865
Glyma.13G166200	0.43878	0.00199993	0.59482	6.7e-06
Glyma.13G166400	0.552432	0.000516097	0.39765	0.0297961
Glyma.13G166500	0.375021	0.0180945	0.822187	3.73e-06
Glyma.13G173500	1.62442	2.32e-25	0.824294	2.06e-07
Glyma.13G176600	0.706133	0.000758394	0.807164	0.0010663
Glyma.13G186200	1.67502	4.37e-31	2.17679	5.35e-08
Glyma.13G188900	0.905817	0.000118406	1.69205	3.69e-06
Glyma.13G200400	1.14354	2.04e-14	0.474342	0.0335057
Glyma.13G205200	0.962972	0.00016865	1.53801	0.000321
Glyma.13G209600	1.09085	8e-10	1.53743	0.000814
Glyma.13G233000	1.08915	7.79e-09	1.59341	1.17e-06
Glyma.13G244400	0.48173	0.0235492	0.578496	0.0282464
Glyma.13G245500	0.503222	0.00243633	0.53455	0.0113045
Glyma.13G266800	0.929515	0.048558	3.41668	0.000358
Glyma.13G274800	0.297452	0.0155103	0.351498	0.0207895
Glyma.13G276100	0.786909	3.8e-09	0.501107	0.00547556
Glyma.13G279900	1.30821	1.01e-07	1.24463	1.19e-05
Glyma.13G285300	3.65629	9.89e-55	3.39928	4.56e-19
Glyma.13G291400	0.85257	8.42e-07	0.697557	9.42e-05
Glyma.13G305800	1.42894	8.43e-05	0.975479	0.00123766
Glyma.13G310900	0.407178	0.000393838	0.470719	0.00221111
Glyma.13G314500	0.322601	0.0188723	0.378964	0.0499801
Glyma.13G326400	1.2068	1.13e-12	0.84065	1.26e-05
Glyma.13G326800	0.835192	4.05e-06	0.911054	2.74e-07
Glyma.13G346700	1.47954	5.04e-10	2.3677	1.08e-13
Glyma.13G352700	1.13188	2.65e-09	0.883794	0.0127803
Glyma.13G358900	0.90484	2.32e-10	0.609062	0.000963
Glyma.13G361900	0.941398	6.52e-09	0.406006	0.000602
Glyma.13G364900	0.589432	2.9e-05	0.383408	0.00876917
Glyma.13G365000	0.805893	0.0449931	1.99565	0.00105574
Glyma.14G001300	0.348098	0.0270432	1.02657	1.01e-10
Glyma.14G014700	0.440513	0.0338995	1.10938	8.84e-05
Glyma.14G015100	1.10934	0.00148986	1.60644	0.024394
Glyma.14G025700	0.731021	0.00868387	1.48559	0.000393
Glyma.14G030700	1.80773	4.14e-09	2.29514	0.00143326
Glyma.14G034700	1.01637	0.0174127	2.7603	0.0114725
Glyma.14G068400	1.5025	0.000196163	3.56197	6.74e-09
Glyma.14G079600	0.67933	0.000374091	0.53968	0.00259411
Glyma.14G080800	0.58113	0.0274757	0.773568	0.00211063
Glyma.14G098200	1.07015	0.000264571	1.12038	0.0197966
Glyma.14G116200	0.417865	0.0389687	0.619204	0.00825901
Glyma.14G144300	1.9562	2.15e-21	1.43914	0.00269382
Glyma.14G187000	0.426897	0.00676746	0.663832	0.000499
Glyma.14G188300	0.847955	0.0104154	1.43682	0.000869
Glyma.14G201500	0.822939	5.43e-05	0.844123	7.8e-07
Glyma.14G201800	0.349044	0.00333936	0.950228	3.46e-05
Glyma.14G208000	1.50546	1.04e-08	2.43648	9.4e-09
Glyma.14G212200	1.45983	2.91e-10	0.999007	0.0111719
Glyma.14G216100	0.692799	0.00801057	1.28063	0.0259299
Glyma.14G222400	0.558924	0.000441202	0.913923	2.33e-05
Glyma.14G223200	0.343718	0.00275047	0.485217	0.000809
Glyma.15G011900	1.39985	1.58e-44	0.661826	6.61e-07
Glyma.15G012000	0.834341	0.00238363	1.63887	2.51e-09
Glyma.15G024600	0.735943	0.0376342	0.953371	0.00180629
Glyma.15G028400	1.19538	7.69e-06	1.62901	1.76e-07
Glyma.15G051700	0.380552	0.0141715	0.372733	0.0211733
Glyma.15G067100	0.636997	0.00617142	1.23181	5.53e-07
Glyma.15G074600	0.520478	0.00900358	0.913824	0.00298489
Glyma.15G105300	0.886652	0.000514766	1.60595	3.22e-11
Glyma.15G110300	0.494857	4.62e-07	0.548114	0.000882
Glyma.15G122200	1.03482	0.00552025	3.16656	1.11e-13
Glyma.15G124400	0.925927	6.31e-05	1.01171	0.00248925
Glyma.15G129200	2.22088	1.18e-41	1.72239	1.54e-39
Glyma.15G146600	0.924818	6.12e-11	0.560301	0.0234127
Glyma.15G156100	2.30601	1.31e-12	3.76724	2.03e-60
Glyma.15G156900	0.742519	0.00252794	0.835249	0.00125286
Glyma.15G158200	1.32986	6.94e-08	1.73298	1.11e-09
Glyma.15G167300	1.28251	4.67e-09	0.982628	0.000274
Glyma.15G170500	1.11823	0.00109272	2.38935	0.000668
Glyma.15G171000	0.834592	2.23e-07	1.24743	6.19e-05
Glyma.15G172600	0.925529	0.00480503	0.862765	0.0263919
Glyma.15G172800	2.24205	3.47e-13	1.56989	0.0288079
Glyma.15G179600	0.812925	6.85e-07	0.778538	3.46e-05
Glyma.15G185800	0.452864	0.0158066	0.710699	0.00208155
Glyma.15G198300	0.407228	0.0343864	0.385087	0.0113669
Glyma.15G203700	0.468813	0.00801795	0.494517	0.00483808
Glyma.15G211500	1.95378	2.77e-08	4.33262	1.67e-10
Glyma.15G212400	0.608247	1.84e-06	0.365425	0.041167
Glyma.15G232000	0.380787	0.00217507	0.411347	0.031141
Glyma.15G251600	0.462963	4.02e-06	0.856891	1.46e-05
Glyma.15G264200	2.8616	3.35e-15	5.31576	6.65e-05
Glyma.15G268200	0.976465	8.44e-07	1.77802	1.52e-12
Glyma.15G269100	0.879217	0.00975549	1.22056	0.0108199
Glyma.15G272400	0.457277	0.00530914	0.435491	0.0348066
Glyma.16G008400	0.395769	0.00160326	0.392662	0.0233308
Glyma.16G008500	1.30651	1.07e-11	1.06178	0.00597991
Glyma.16G013600	0.853772	0.000210804	0.979387	3.15e-08
Glyma.16G014700	1.04162	9.79e-07	0.873711	0.00769963
Glyma.16G019900	0.895268	0.000225258	1.1073	0.00135311
Glyma.16G023000	1.97668	5.01e-18	0.636036	0.00130761
Glyma.16G032400	1.64039	4.21e-14	1.33997	3.57e-08
Glyma.16G036300	0.841898	0.000125733	0.662592	0.00596735
Glyma.16G038200	0.740204	0.0338535	1.30234	0.0417258
Glyma.16G046400	0.573754	0.000188225	0.899815	6.65e-12
Glyma.16G060800	1.92543	6.19e-34	1.72365	0.000351
Glyma.16G062600	1.01641	9.85e-16	0.54539	0.0168881
Glyma.16G063200	0.309346	0.0309277	0.398314	0.000902
Glyma.16G095700	0.596033	1.32e-05	0.530345	0.00640048
Glyma.16G110100	0.933691	0.0230955	1.19938	0.035445
Glyma.16G112600	0.495582	0.0107301	0.560522	0.0219673
Glyma.16G138300	0.511058	0.00295554	0.84315	0.000951
Glyma.16G145600	1.89855	3.46e-30	0.811279	0.0128426
Glyma.16G177900	0.415042	0.00327187	1.52826	2.01e-11
Glyma.16G180300	1.35887	2.97e-09	1.36071	1.45e-05
Glyma.16G182500	0.302254	0.0458915	0.351361	0.027423
Glyma.16G195600	3.45121	2.41e-27	3.6552	5.14e-05
Glyma.16G196300	0.924732	0.0247808	4.37089	1.35e-06
Glyma.16G200900	0.633187	0.000215923	0.358827	0.0478738
Glyma.16G210500	0.915341	1.19e-12	0.814841	2.12e-05
Glyma.16G212400	1.95401	8.95e-23	1.34847	0.000413
Glyma.16G212600	1.80069	1.11e-29	0.84646	0.000284
Glyma.16G220900	0.599338	0.0491827	1.29657	2.72e-06
Glyma.16G222200	1.26489	9.78e-21	0.808977	0.0187541
Glyma.17G003200	0.600794	0.000970547	0.477002	0.0283325
Glyma.17G005100	0.771625	1.53e-05	1.06994	4.96e-07
Glyma.17G029200	0.478953	0.0253552	1.05125	0.0141773
Glyma.17G030200	1.30683	2.5e-22	0.951056	3.52e-14
Glyma.17G030300	1.99635	4.18e-48	1.18963	1.97e-07
Glyma.17G030400	2.55663	2.17e-29	1.23771	3.61e-10
Glyma.17G037500	1.28882	2.71e-07	1.10765	0.000559
Glyma.17G039200	0.48841	0.00138863	0.570057	8.16e-05
Glyma.17G048900	0.684477	1.13e-05	0.560213	0.000233
Glyma.17G050100	0.75916	1.9e-05	0.76259	0.00752347
Glyma.17G053600	0.897513	0.000729565	2.49337	1.03e-18
Glyma.17G064300	1.02405	0.00517031	2.30025	0.000991
Glyma.17G066900	0.577849	0.0302551	1.41013	0.00401267
Glyma.17G089600	0.866886	1.04e-10	0.460792	0.00754361
Glyma.17G096000	0.584723	0.00142296	0.573797	0.00610904
Glyma.17G096200	0.92736	0.0214207	1.50233	0.00808365
Glyma.17G097900	0.388898	0.00585836	1.04594	0.000198
Glyma.17G103400	0.696172	1.59e-05	0.636357	0.000559
Glyma.17G106800	0.394076	0.0440459	0.495619	0.0389209
Glyma.17G144900	0.277728	0.0300119	0.370196	0.035853
Glyma.17G152400	0.632297	0.0333914	1.30777	0.00477404
Glyma.17G169700	0.279825	0.0499309	0.514086	0.00288411
Glyma.17G198300	0.763988	3.76e-06	0.674994	0.00306973
Glyma.17G199200	0.770958	0.0118436	0.632164	0.0325353
Glyma.17G217000	0.359493	0.0184319	0.699749	0.000308
Glyma.17G236400	0.432904	0.0296639	0.646836	0.0119507
Glyma.17G236900	0.429801	0.0289858	0.830359	0.000927
Glyma.17G245100	1.05792	3.69e-15	0.584568	0.000837
Glyma.17G245600	0.335507	0.0066841	0.391114	0.0205303
Glyma.17G250800	0.507042	0.00534935	0.911352	9.01e-07
Glyma.18G004200	0.31983	0.0218337	0.360755	0.0189362
Glyma.18G011100	0.36931	0.045976	0.722355	0.00153793
Glyma.18G013600	0.917411	1.16e-12	0.843576	0.0051287
Glyma.18G029300	0.556887	0.0195407	0.889831	1.26e-05
Glyma.18G034600	0.821344	5.2e-05	0.626164	0.0394193
Glyma.18G038500	1.55983	1.03e-11	1.12498	0.000361
Glyma.18G040500	0.647283	0.000630946	0.9435	2.7e-07
Glyma.18G055600	0.973808	0.0196861	1.48279	0.0298261
Glyma.18G064900	0.937755	2.24e-05	0.385477	0.0175483
Glyma.18G081100	0.476015	0.00282235	0.650114	0.00284768
Glyma.18G095200	0.418217	0.00977319	0.508955	0.0121812
Glyma.18G102400	1.24819	2.59e-11	1.37566	6.54e-05
Glyma.18G122000	1.09218	1.13e-06	0.550964	0.00503051
Glyma.18G127900	1.50124	5.39e-08	1.0438	0.013981
Glyma.18G164100	0.395088	0.0323548	0.623483	0.00161082
Glyma.18G170200	0.288873	0.02008	0.308211	0.0390631
Glyma.18G181500	0.409402	0.0165209	0.445148	0.00916729
Glyma.18G187200	0.392921	0.000884377	0.531521	0.005451
Glyma.18G192800	0.485529	8.41e-05	0.408144	0.0408218
Glyma.18G208800	0.737499	3.67e-05	1.14662	4.58e-06
Glyma.18G210100	0.415672	0.00587519	0.372288	0.0313069
Glyma.18G214000	0.763981	6.44e-09	0.550796	0.0312335
Glyma.18G234100	0.547952	0.00427712	0.577291	0.00158023
Glyma.18G238800	1.23175	1.18e-06	1.74764	0.000196
Glyma.18G241300	0.353871	0.0170035	0.404702	0.0304772
Glyma.18G249100	0.726012	0.0152627	1.83877	1.13e-09
Glyma.18G254100	0.57226	0.000903905	2.23386	1.34e-14
Glyma.18G264600	0.327194	0.0278679	0.432468	0.00431055
Glyma.18G268200	0.935534	1.7e-10	1.33329	2.85e-06
Glyma.18G268300	0.717887	0.00101866	0.695167	0.0316708
Glyma.18G277300	0.401374	0.00452173	0.403814	0.00219065
Glyma.18G286900	0.63625	0.000230985	0.837123	0.000274
Glyma.18G294300	1.68957	5.03e-14	1.43798	1.06e-05
Glyma.18G294800	1.68055	9.94e-20	1.15024	2.04e-05
Glyma.18G297500	1.56266	0.000184121	2.90955	0.0116089
Glyma.18G300500	0.832053	2.15e-07	0.644297	0.00103672
Glyma.18G301900	0.349761	0.038283	0.498365	0.00413978
Glyma.19G003700	0.886859	5.88e-17	1.17061	0.000929
Glyma.19G005700	1.47199	0.000301543	1.5152	0.00427878
Glyma.19G011700	0.714958	2.79e-09	0.68789	0.000332
Glyma.19G025200	0.635195	2.94e-05	0.951598	5.34e-06
Glyma.19G033500	1.36579	1.69e-06	0.832372	0.00294549
Glyma.19G037500	0.46834	0.0175068	0.634522	0.0339356
Glyma.19G076500	0.74842	0.00926344	1.07187	0.0150742
Glyma.19G076800	2.03503	3.27e-07	2.50907	1.13e-05
Glyma.19G082300	0.420573	0.0139374	0.309404	0.0457641
Glyma.19G121600	0.523531	0.0012925	0.543397	0.00341144
Glyma.19G127800	0.440535	0.000181172	0.445191	0.0295951
Glyma.19G144700	0.715043	8.57e-05	1.08636	0.004214
Glyma.19G146800	1.89656	3.13e-07	1.46736	0.000729
Glyma.19G151100	1.99844	1.03e-19	3.137	5.23e-48
Glyma.19G151200	2.1954	1.16e-19	2.54667	4.59e-08
Glyma.19G197100	1.5968	9.65e-16	0.66382	0.00287157
Glyma.19G211900	0.69256	0.000107945	0.475311	0.00623107
Glyma.19G231800	1.0939	0.00025809	1.09024	0.0323294
Glyma.19G236800	0.526255	7.04e-05	0.412289	0.0225403
Glyma.19G239000	1.3954	2.52e-09	1.55997	2.7e-11
Glyma.19G245500	1.13138	0.000110064	3.17256	4.85e-17
Glyma.19G255300	0.695422	8.05e-05	2.08374	1.73e-18
Glyma.19G258800	1.08127	0.000610435	2.04075	3.72e-06
Glyma.19G260900	0.653279	0.00070452	1.25465	0.00281681
Glyma.19G263300	1.72096	4.87e-12	1.62988	3.48e-05
Glyma.20G001400	1.5307	8.12e-07	3.30246	1.77e-07
Glyma.20G006400	0.513465	0.0356538	1.03435	3.85e-05
Glyma.20G010200	1.81314	2.36e-21	1.08801	0.00249304
Glyma.20G013500	0.76215	0.000107204	0.553835	0.00274471
Glyma.20G017000	0.402189	0.0182568	0.613779	0.00154468
Glyma.20G025800	0.650049	0.000953448	0.692208	0.012931
Glyma.20G032500	0.954721	0.00668557	2.73339	0.0126527
Glyma.20G048300	0.552335	0.00105618	0.836958	0.000256
Glyma.20G051100	0.416339	0.0454679	0.61972	0.00183999
Glyma.20G054500	0.415577	0.00543306	0.612129	0.000456
Glyma.20G058500	0.509915	2.73e-06	0.356199	0.0372661
Glyma.20G064500	0.605077	0.00454729	1.03668	0.000987
Glyma.20G099100	2.70197	9.98e-28	2.37633	0.0054519
Glyma.20G107600	0.768991	1.33e-07	0.657176	6.34e-05
Glyma.20G123800	0.320249	0.0208428	0.413588	0.0466981
Glyma.20G133200	0.402968	0.0423702	1.1673	8.3e-06
Glyma.20G134000	0.690113	0.00142296	0.699947	0.0047003
Glyma.20G138100	1.0906	2.5e-09	0.902608	0.00958041
Glyma.20G139400	1.13636	7.53e-08	0.96286	0.00914281
Glyma.20G140000	0.572445	0.000516235	1.07664	0.00266495
Glyma.20G149500	0.634383	4.86e-05	1.13848	1.8e-05
Glyma.20G157300	0.498412	1.04e-05	0.310144	0.0412718
Glyma.20G169200	1.05141	5.5e-06	1.68315	5.86e-08
Glyma.20G172100	0.353416	0.00355404	0.430074	0.00507163
Glyma.20G204000	0.517914	0.0387895	1.35439	0.000585
Glyma.20G205800	1.57324	9.77e-06	2.09678	1.52e-09
Glyma.20G227300	0.881495	1.96e-06	0.602859	0.0138416
Glyma.20G231200	0.971179	4.91e-08	0.784549	4.93e-05
Glyma.20G240000	0.491194	0.0498299	0.683386	0.0497591
Glyma.20G240600	0.747649	0.0069934	1.03802	0.0119035
Glyma.20G241200	0.465588	0.000121723	0.425482	0.00748311
Glyma.U027300	1.5158	1.02e-05	3.12967	4.61e-09
Glyma.U027400	1.28424	7.66e-08	2.12544	0.00521649
Glyma.U030900	2.45378	7.84e-17	2.49348	6.32e-06
1Adjusted P-value at 0.05 with Benjamini Hochberg procedure.
