# Supplementary material for: RNA-Seq Dissects Incomplete Activation of Phytoalexin Biosynthesis by the Soybean Transcription Factors GmMYB29A2 and GmNAC42-1
Source: Plants (Basel). 2023 Jan 25;12(3):545. doi: 10.3390/plants12030545 (PMC9921300; doi:10.3390/plants12030545)
Supplement: Supplementary file 1 [file plants-12-00545-s001.zip › Supplemental Table S2. Genes commonly upregulated by WGE and p35S-GmNAC42-1_.xlsx]

## Sheet: Sheet1
Supplemental Table S2. Genes commonly upregulated by WGE and p35S::GmNAC42-1.
Wm82.a2 (Glyma 2.0)	WGEvsH2O, empty vector log2FoldChange	WGEvsH2O, empty vector adjusted P-value1	p35S::GmNAC42-1 vsVector, H2O log2FoldChange	p35S::GmNAC42-1 vsVector, adjusted P-value1
Glyma.01G005000	1.03912	7.32e-13	1.16947	0.000255
Glyma.01G006100	0.670561	0.000341983	0.917588	0.000827
Glyma.01G006200	0.50139	0.015001	0.710577	0.0166055
Glyma.01G006500	1.07795	0.00887542	1.07941	0.000676
Glyma.01G007200	0.695783	2.52e-10	0.477951	0.035488
Glyma.01G013900	0.730626	0.000127281	1.17884	8.59e-05
Glyma.01G015000	0.560587	0.000438732	0.645439	0.0150806
Glyma.01G019500	0.557972	0.0047458	0.771156	0.0040823
Glyma.01G021600	0.438319	0.0181173	0.617338	0.00395619
Glyma.01G023200	0.596614	0.000656222	0.797131	0.000815
Glyma.01G036900	0.855293	0.000809878	1.51316	0.000384
Glyma.01G043400	1.00359	0.0131238	2.59541	1.76e-05
Glyma.01G046500	0.879454	7.44e-07	0.670684	0.0178499
Glyma.01G046700	0.5563	0.0407798	0.996691	0.00719673
Glyma.01G087500	1.05266	9.3e-18	0.926639	0.0235363
Glyma.01G096000	1.07683	6.72e-06	0.944307	0.0208873
Glyma.01G131100	0.783244	2.58e-06	1.20067	1.29e-05
Glyma.01G141100	1.52828	2.45e-11	1.8045	4.63e-05
Glyma.01G143500	1.41032	4.82e-08	1.46149	0.0216246
Glyma.01G154300	0.511854	0.00536516	0.629097	0.028404
Glyma.01G161100	0.642087	5.28e-08	0.663316	0.0198862
Glyma.01G164800	0.499092	0.0167186	0.811376	0.000476
Glyma.01G165300	1.38247	0.000687696	2.78347	0.00185842
Glyma.01G172100	1.37002	7.93e-07	1.7048	0.0151362
Glyma.01G177400	1.38537	3.06e-05	2.25245	6.07e-09
Glyma.01G183600	0.492337	0.0158663	0.624244	0.0495691
Glyma.01G187600	1.38997	3.53e-09	1.30246	0.00586139
Glyma.01G190300	0.411639	0.0333555	0.800884	0.00130697
Glyma.01G195500	0.897226	0.0121825	2.04834	4.58e-07
Glyma.01G210400	2.66344	6.82e-32	2.86484	2.86e-08
Glyma.01G212100	0.719551	0.00842466	1.21274	0.00380152
Glyma.01G225100	1.84285	5.03e-06	2.45921	0.0180219
Glyma.01G234500	0.511352	0.0249374	1.07342	0.0242574
Glyma.01G239200	0.54169	0.00204803	0.778526	0.000966
Glyma.01G240300	0.47479	1.46e-05	0.717897	0.00216443
Glyma.02G016100	0.722534	9.25e-05	0.971508	0.00220155
Glyma.02G018300	0.592059	0.0170997	0.907732	0.00065
Glyma.02G026300	0.626515	0.000668528	0.696546	0.00730765
Glyma.02G041900	0.539389	0.00249443	1.14679	0.00095
Glyma.02G049700	0.703294	0.00742068	0.875257	0.0211999
Glyma.02G063900	1.59768	1.25e-10	1.78417	0.0387319
Glyma.02G089500	1.34125	3.25e-31	0.76693	0.0384388
Glyma.02G090000	1.68221	6.09e-07	2.47976	0.0161772
Glyma.02G092300	1.12503	0.000179049	2.13055	2.28e-06
Glyma.02G106700	0.980312	8.66e-15	0.715495	0.0114029
Glyma.02G124100	0.560117	7.66e-08	0.642569	0.00275119
Glyma.02G134300	0.762583	0.00795198	1.62517	9.01e-12
Glyma.02G136700	0.729689	0.00011219	1.22386	0.00538869
Glyma.02G137200	0.77934	0.00218166	1.13465	0.0099265
Glyma.02G146100	1.34369	1.59e-06	1.67255	0.0122189
Glyma.02G155600	1.41309	1.94e-19	1.22309	0.0178169
Glyma.02G157800	0.469795	0.00736592	0.583848	0.0295236
Glyma.02G157900	1.48835	4.1e-06	2.02076	1.11e-10
Glyma.02G158200	0.74794	0.00501646	1.17275	0.000586
Glyma.02G204000	0.569032	5.35e-05	0.854777	2.36e-05
Glyma.02G224200	0.730513	0.00119366	1.18527	2.74e-05
Glyma.02G234000	1.40462	2.31e-08	1.96499	0.000257
Glyma.02G265900	1.37292	6.93e-06	2.71755	5.86e-08
Glyma.02G284300	1.67725	3.02e-07	6.84678	3.13e-10
Glyma.02G303400	0.880012	5.88e-05	1.59158	3.78e-07
Glyma.03G117800	1.01434	0.00670085	1.73989	0.000573
Glyma.03G128800	0.513433	0.00341348	0.633343	0.0285645
Glyma.03G134800	0.921555	0.00222902	1.51705	0.00065
Glyma.03G174500	0.882873	1.6e-06	1.04233	0.0193988
Glyma.03G189500	0.458573	0.00016901	0.62956	0.0162815
Glyma.03G189700	0.894094	8.63e-05	1.67218	4.03e-12
Glyma.03G202100	0.788899	0.0033093	1.08523	0.0338025
Glyma.03G214100	1.74791	8.28e-12	1.50856	0.000368
Glyma.03G216300	0.818675	0.0474101	2.04126	4.17e-06
Glyma.03G219900	1.00983	0.0151839	3.35544	0.0118659
Glyma.03G224100	1.26478	0.00280454	5.63895	1.1e-08
Glyma.03G231700	0.95949	1.6e-09	1.27071	8.61e-08
Glyma.03G236900	0.522996	0.00770828	0.927161	0.00209719
Glyma.03G244800	0.597796	0.0118288	1.71992	2.07e-07
Glyma.03G245500	0.947204	3.75e-08	0.864236	0.0178755
Glyma.04G004500	0.917341	8.18e-08	1.57499	7.36e-06
Glyma.04G012300	1.42592	9.31e-09	1.74463	4.97e-05
Glyma.04G032100	0.772996	0.00275085	1.20133	0.000135
Glyma.04G040200	0.895976	6.76e-09	1.06499	0.000216
Glyma.04G052700	0.55106	0.00280138	0.580764	0.0307888
Glyma.04G054600	1.03859	0.000124331	1.60971	8.7e-07
Glyma.04G063700	0.883363	0.00456289	1.34857	0.000333
Glyma.04G086700	1.78463	5.11e-19	1.9748	0.00100071
Glyma.04G086900	0.821996	0.00031387	1.39501	2.45e-06
Glyma.04G091200	1.3434	0.00154978	2.70946	0.000736
Glyma.04G100100	0.411281	0.0119296	0.567475	0.036242
Glyma.04G116700	0.553315	0.0236328	0.934076	6.83e-05
Glyma.04G123100	0.804616	9.62e-06	0.563486	0.0482159
Glyma.04G128700	0.885206	8e-05	0.974551	0.000647
Glyma.04G138600	0.690834	0.0226305	2.0017	3.9e-06
Glyma.04G184600	0.405269	0.0413266	0.602274	0.0257463
Glyma.04G185200	0.803326	8.17e-05	1.03759	0.00356224
Glyma.04G213900	1.2152	0.00487717	4.83965	0.00568345
Glyma.04G225600	0.386926	0.0173437	0.594649	0.00398775
Glyma.04G228000	0.515425	0.0060147	0.943071	0.0102794
Glyma.04G228300	1.01833	2.58e-09	1.12632	0.000469
Glyma.04G241900	0.414463	0.0090952	0.505263	0.0209012
Glyma.04G243900	0.419447	0.0355786	1.19475	1.73e-05
Glyma.05G000700	0.939907	1.51e-10	0.857829	0.000437
Glyma.05G001600	0.662691	8.49e-06	0.448841	0.0491549
Glyma.05G009000	0.646042	1.06e-06	1.62854	6.92e-05
Glyma.05G018800	0.78109	7.25e-07	0.770532	0.00036
Glyma.05G055000	0.96867	9.08e-10	0.728661	0.000368
Glyma.05G068600	0.489814	0.0160131	0.655019	0.0337814
Glyma.05G124000	1.89103	1.98e-06	4.4421	0.0372445
Glyma.05G146300	1.19456	0.00508844	2.50991	1.14e-10
Glyma.05G149800	0.792728	0.0165052	1.50484	0.00440574
Glyma.05G151100	0.943332	0.0290859	2.42779	6.32e-10
Glyma.05G160700	0.895493	0.000555815	1.15792	0.035972
Glyma.05G182600	0.619784	0.000324102	0.919437	0.00655174
Glyma.05G193400	0.744714	0.0324222	1.6962	0.000106
Glyma.05G206200	1.24135	0.00218166	5.84441	0.016736
Glyma.05G230300	1.56022	0.000186159	4.53273	1.73e-05
Glyma.05G237500	1.21239	0.00107236	1.9701	3.62e-06
Glyma.06G031000	1.30663	1.62e-06	1.20384	0.0328862
Glyma.06G031100	1.61413	4.62e-05	1.65902	0.0207574
Glyma.06G047600	0.533455	0.000335633	0.72588	0.0370212
Glyma.06G051900	0.639905	0.0228281	1.74157	0.000531
Glyma.06G054800	0.77075	0.00973801	1.38076	0.000128
Glyma.06G062100	0.75287	0.00224518	1.31896	9.44e-05
Glyma.06G065900	0.814066	2.56e-05	0.793601	0.0384317
Glyma.06G082400	0.620042	4.23e-06	1.23965	2.5e-06
Glyma.06G082700	1.50158	0.000364373	5.0321	0.00156071
Glyma.06G082800	0.853259	0.000581492	1.00479	0.000616
Glyma.06G083000	0.378874	0.0139741	0.513055	0.0440196
Glyma.06G088400	1.64411	3.32e-06	0.517621	0.0105617
Glyma.06G088600	1.23863	3.26e-07	1.39925	1.01e-06
Glyma.06G092900	0.956438	0.0269094	4.67761	0.0078439
Glyma.06G094100	0.428607	0.0254283	0.708173	0.0281937
Glyma.06G136600	1.01663	2.67e-08	0.964196	0.000105
Glyma.06G148400	0.873636	0.0496181	2.29509	0.0122038
Glyma.06G149200	0.628804	0.000262366	0.65874	0.00418639
Glyma.06G149500	0.612472	0.0105915	1.02308	0.0204865
Glyma.06G154400	1.2317	0.0051351	3.37985	0.0153585
Glyma.06G154500	0.868335	0.0157562	1.92864	1.28e-05
Glyma.06G168300	1.15614	5.63e-08	0.852082	0.0283026
Glyma.06G187600	0.277033	0.0188927	0.581757	0.0250173
Glyma.06G192100	2.31246	6.05e-10	3.92352	0.000575
Glyma.06G216500	0.823166	0.0232128	3.17584	1.2e-05
Glyma.06G242100	0.874664	0.00248832	1.91583	5.2e-05
Glyma.06G249400	2.27906	5.23e-15	2.11655	0.00122457
Glyma.06G265600	0.507718	0.00364216	1.02126	0.000197
Glyma.06G268700	0.528363	0.000144546	0.453856	0.0284693
Glyma.06G270300	0.797081	0.00103416	0.7254	0.0191782
Glyma.06G297600	0.960854	4.45e-06	0.977632	0.00429507
Glyma.06G298600	0.231541	0.0499018	0.79146	0.0374377
Glyma.06G298700	0.685442	1.25e-08	1.28247	0.00179094
Glyma.06G314700	0.529552	0.00995075	0.724831	0.00634201
Glyma.07G004600	0.713704	0.00242294	0.762525	0.0100858
Glyma.07G010700	1.07306	0.00145294	2.76592	6.37e-09
Glyma.07G025200	0.308033	0.0351243	0.549344	0.0218108
Glyma.07G034400	1.17036	8.24e-07	1.10052	0.0151
Glyma.07G039600	1.05313	1.8e-05	1.65359	1.06e-06
Glyma.07G039700	1.11427	0.000475263	2.36669	7.72e-05
Glyma.07G039900	0.47986	1.75e-06	0.680046	0.0031116
Glyma.07G043100	1.10771	3.95e-13	0.913829	0.00129639
Glyma.07G043500	1.24124	0.000168023	2.16788	0.00172218
Glyma.07G045700	0.534263	0.0394202	1.28668	0.000363
Glyma.07G045900	0.647206	0.000141986	0.857637	0.000207
Glyma.07G058800	1.81462	3.82e-08	2.55874	2e-08
Glyma.07G092600	0.443207	0.016876	0.710342	0.00934969
Glyma.07G095900	0.670833	2.45e-06	0.784469	5.25e-07
Glyma.07G105700	0.593266	0.00052169	0.83655	0.0259287
Glyma.07G107500	0.894	0.000369065	1.00449	0.00648857
Glyma.07G109200	0.801166	0.0156007	2.20698	3.57e-05
Glyma.07G125500	0.934261	0.0104154	1.43649	0.000791
Glyma.07G129000	0.613152	0.0235818	0.89763	0.0261282
Glyma.07G139200	0.727598	6.73e-08	0.798432	0.00513038
Glyma.07G142000	0.660054	0.000314782	0.684974	0.0375144
Glyma.07G153100	0.548263	0.0171528	1.61788	2.05e-07
Glyma.07G177600	1.37208	7.02e-09	1.21574	0.00323238
Glyma.07G183100	1.03207	0.0203955	1.93556	0.00102867
Glyma.07G184000	0.834946	1.93e-07	0.739086	0.00339966
Glyma.07G185000	1.0282	0.000634475	1.12585	8.65e-05
Glyma.07G188800	1.27316	4e-08	1.20612	4.58e-07
Glyma.07G197100	1.06065	0.00648469	2.55313	0.000542
Glyma.07G198700	0.410953	0.0301581	0.78906	0.0117468
Glyma.07G216600	0.981323	8.69e-07	1.06456	0.00464505
Glyma.07G238700	1.14763	0.00275085	2.18341	3.34e-07
Glyma.07G265000	1.05908	0.0149666	2.42019	0.0250173
Glyma.07G267700	0.660031	0.000449992	1.32579	0.00344318
Glyma.08G005600	1.00983	1.48e-15	1.16054	0.000236
Glyma.08G042100	1.63162	5.43e-08	1.70606	0.0130066
Glyma.08G047300	0.708584	0.0106125	1.46769	5.41e-05
Glyma.08G058400	0.631087	0.00118386	0.611542	0.0132025
Glyma.08G065900	0.741303	0.00370619	0.804035	0.0326025
Glyma.08G072800	0.46295	0.0259728	0.798785	0.0286792
Glyma.08G078900	1.50503	0.000221036	4.93138	0.0233593
Glyma.08G079100	1.43707	2.99e-09	1.14762	0.0253615
Glyma.08G080400	0.663687	0.011935	1.45497	0.000563
Glyma.08G104100	1.23128	0.00207476	2.09757	8.84e-06
Glyma.08G162300	0.328115	0.0253709	0.662468	0.0118659
Glyma.08G171100	0.507621	0.00266913	0.787017	3.78e-05
Glyma.08G175200	0.72724	4.26e-20	0.847665	0.030961
Glyma.08G193900	0.857102	6.39e-08	1.34956	7.63e-05
Glyma.08G202800	0.913734	0.00616452	1.59901	5.36e-08
Glyma.08G216300	1.31352	3.77e-13	1.19322	0.000376
Glyma.08G220100	0.600669	0.00241569	0.696435	0.00178806
Glyma.08G229700	1.46937	0.000437907	4.89583	0.0417486
Glyma.08G232400	1.40216	4.79e-13	2.0004	2.07e-07
Glyma.08G235600	0.644299	8.48e-07	0.590899	0.0295303
Glyma.08G250300	1.65648	8.21e-25	1.6314	1.71e-06
Glyma.08G261200	1.15696	0.000440627	1.24556	0.00447437
Glyma.08G298900	0.910543	9.5e-06	0.614387	0.048448
Glyma.08G308000	0.953005	5.04e-05	1.60464	0.000202
Glyma.08G317200	0.867622	1.2e-05	0.830136	0.00430691
Glyma.08G326800	0.482064	0.0110304	0.703723	0.0200143
Glyma.08G345200	0.666347	0.00314048	0.805446	0.000467
Glyma.08G364700	2.88961	3.74e-27	2.52256	5.43e-06
Glyma.09G011800	0.652188	0.00117575	0.8007	0.0104712
Glyma.09G045600	1.27094	2.18e-07	1.70995	1.49e-12
Glyma.09G045800	0.835869	5.12e-06	0.799086	0.00388299
Glyma.09G065000	0.739963	3.84e-09	0.774678	0.00953353
Glyma.09G069500	0.871955	0.000240676	0.735542	0.0161772
Glyma.09G071800	0.497691	6.04e-05	0.66009	0.0198141
Glyma.09G083300	1.16416	7.97e-07	1.69163	1.17e-08
Glyma.09G085000	0.875325	0.00123524	1.29285	3.46e-05
Glyma.09G092100	1.23133	3.84e-12	1.34706	0.000231
Glyma.09G140800	0.834837	0.0023892	2.50223	1.8e-05
Glyma.09G143000	1.12033	2e-06	1.45053	0.000637
Glyma.09G150400	1.99923	5.61e-07	4.41891	0.0486695
Glyma.09G153900	0.927019	0.00705856	2.28499	2.54e-09
Glyma.09G160100	1.26026	2.18e-10	1.3962	0.00457291
Glyma.09G161100	1.5939	1.39e-20	0.733882	0.01745
Glyma.09G163700	1.07302	0.00151813	1.70228	3.32e-05
Glyma.09G163800	1.56525	0.000167339	5.39769	0.00343488
Glyma.09G163900	1.0501	0.000229679	1.62525	9.99e-06
Glyma.09G173200	1.19932	7.95e-07	1.436	2e-06
Glyma.09G174200	0.62615	0.0485474	0.99617	0.0166844
Glyma.09G199100	0.822433	8.13e-06	0.940752	0.000705
Glyma.09G203000	0.584754	0.000270026	1.14443	0.00409948
Glyma.09G203100	0.757402	4.05e-06	0.993499	0.00764818
Glyma.09G230700	0.519988	0.000146134	0.721574	0.00199766
Glyma.09G269400	2.25996	7.94e-09	4.67565	0.000198
Glyma.09G277000	0.864299	1.94e-07	0.80438	0.0013159
Glyma.10G006600	2.48349	1.66e-17	2.137	0.0315018
Glyma.10G007300	0.499391	0.00125119	0.721266	0.0117468
Glyma.10G016500	0.863391	6.97e-06	1.02374	1.1e-06
Glyma.10G018700	0.7266	4.65e-06	1.03201	0.0194079
Glyma.10G022300	1.24651	0.00419064	2.30931	0.0314158
Glyma.10G024300	0.513441	0.00419848	0.606082	0.00484036
Glyma.10G027900	1.13571	7.67e-05	1.41046	0.0133838
Glyma.10G045600	0.410657	0.00249443	0.609234	0.0482131
Glyma.10G051800	1.38488	4.94e-07	2.12716	3.1e-05
Glyma.10G053200	0.615754	0.0308926	1.47569	0.0242238
Glyma.10G070300	1.05238	0.00982954	5.8588	0.00495414
Glyma.10G132300	0.693876	8.33e-07	1.03308	0.00132717
Glyma.10G147700	1.07095	0.00137148	2.14492	3.1e-11
Glyma.10G179600	0.504152	0.00474737	0.948652	0.0156073
Glyma.10G180500	2.15892	7.01e-09	3.1821	0.0160687
Glyma.10G183000	1.0963	0.00327215	2.12309	0.0148916
Glyma.10G194500	0.539012	0.0157534	0.93358	0.0162815
Glyma.10G197500	0.480283	0.0370386	0.671432	0.0200541
Glyma.10G201100	1.38322	6.32e-05	2.78894	2.05e-12
Glyma.10G204400	0.836589	0.000411315	1.20188	0.00619003
Glyma.10G209600	0.443062	0.0288557	0.698655	0.00827996
Glyma.10G215700	1.41732	0.000419005	2.95498	0.0242238
Glyma.10G222200	0.712579	0.0139285	1.21221	0.00209719
Glyma.10G224900	0.561358	0.00110534	0.810865	0.000184
Glyma.10G239100	0.405651	0.014441	0.702787	0.00502769
Glyma.10G248000	0.561375	0.000624072	0.560349	0.0331346
Glyma.10G277900	0.311988	0.0299649	0.568567	0.0122038
Glyma.10G278600	1.05442	6.94e-05	1.98105	4.7e-05
Glyma.10G284500	0.763315	0.00101347	2.16286	6.44e-07
Glyma.10G294900	0.308541	0.0146583	0.422281	0.0361667
Glyma.11G004300	0.454432	0.00251872	0.515672	0.0209617
Glyma.11G050400	0.946811	0.0404345	2.67194	0.00065
Glyma.11G051900	1.41887	0.000143817	2.08501	0.0176066
Glyma.11G053500	0.449507	0.000911058	0.665851	0.0016662
Glyma.11G053600	0.481553	0.0319695	0.693449	0.0109864
Glyma.11G070200	1.80255	1.18e-26	1.14005	0.010752
Glyma.11G071100	1.50284	4.47e-08	1.63024	0.038027
Glyma.11G075500	0.933734	0.000305345	1.4336	7.38e-07
Glyma.11G077400	1.55331	1.64e-16	1.15335	0.00399149
Glyma.11G077900	1.38538	0.000959793	3.30194	0.00989756
Glyma.11G078000	1.32249	0.000394147	2.10902	2.16e-05
Glyma.11G090300	0.552546	0.00617252	0.645527	0.0425255
Glyma.11G096400	0.562683	0.0022247	0.890099	9.43e-05
Glyma.11G108000	0.331593	0.0213237	1.30824	0.00101485
Glyma.11G117100	0.796513	3.64e-05	1.03912	0.00718572
Glyma.11G129100	0.900947	4.98e-08	1.20391	0.000231
Glyma.11G130600	0.562503	0.000985745	0.70516	0.0239601
Glyma.11G140800	1.5306	3.01e-05	2.6792	0.00764818
Glyma.11G142700	0.394856	0.0106692	0.583406	0.0131424
Glyma.11G154700	0.576706	0.0105926	1.84367	0.000135
Glyma.11G154800	1.02125	0.000238954	1.42642	2.76e-08
Glyma.11G185700	0.865902	7.77e-09	1.13976	0.000275
Glyma.11G192800	0.820917	7.91e-07	1.45484	0.000103
Glyma.11G192900	0.986385	1.26e-06	1.351	1.26e-05
Glyma.11G210300	1.6287	3.91e-05	3.10051	0.00803485
Glyma.11G220200	0.396086	0.00706194	0.542975	0.0406421
Glyma.11G232200	0.506348	0.001649	0.771706	0.0168754
Glyma.11G233300	0.456648	0.00377533	0.522198	0.0404753
Glyma.11G235000	1.56804	7.08e-14	2.56706	4.39e-11
Glyma.11G240900	0.599447	0.000381463	0.65635	0.0187086
Glyma.11G243500	1.09284	5.24e-07	1.29277	0.000236
Glyma.11G247600	0.197534	0.0147417	0.594696	0.0191104
Glyma.12G008500	0.356969	0.045248	0.596508	0.00648861
Glyma.12G015700	0.963055	3.87e-06	1.19851	0.00108217
Glyma.12G023200	1.11371	1.04e-06	1.26285	0.000929
Glyma.12G030400	0.40484	0.048387	0.559805	0.0375144
Glyma.12G031700	0.531779	0.00472388	0.742024	0.0191782
Glyma.12G040400	0.952903	4.04e-10	0.632685	0.0145672
Glyma.12G053700	0.519694	0.0332512	0.72391	0.0175429
Glyma.12G055000	0.678275	0.000124995	0.703866	0.00741825
Glyma.12G097200	1.52823	0.000247448	2.40949	0.000383
Glyma.12G103900	0.455802	0.000195477	0.656851	0.00592853
Glyma.12G109600	1.49889	1.07e-08	0.968935	0.0206663
Glyma.12G137700	1.64219	9.47e-10	1.93095	0.000277
Glyma.12G145400	0.86373	2.6e-06	0.757096	0.0208988
Glyma.12G150500	1.02589	0.0253423	3.86249	0.00036
Glyma.12G155900	1.15383	1.24e-07	1.32689	9.97e-07
Glyma.12G186500	0.766235	0.00688537	1.09117	0.0208968
Glyma.12G194000	0.353801	0.0079014	0.550954	0.0383318
Glyma.12G200500	0.887321	0.000102574	2.10974	4.35e-06
Glyma.12G209600	0.991854	0.000488742	2.23528	7.52e-09
Glyma.12G215300	0.927294	6.32e-05	0.787918	0.0156073
Glyma.12G218300	1.33581	3.83e-11	1.75188	6.07e-09
Glyma.12G220600	1.073	1.12e-08	0.855497	0.0498767
Glyma.12G222400	1.8152	4.81e-07	2.93838	0.00188573
Glyma.12G224300	1.223	1.94e-06	1.90315	0.000729
Glyma.12G237600	0.808733	0.000381519	1.00149	0.0232002
Glyma.13G035700	1.53393	5.31e-24	0.847699	0.0428363
Glyma.13G037600	0.665093	0.000383284	0.911039	0.00101344
Glyma.13G046300	1.68065	7.69e-14	1.98177	2.25e-08
Glyma.13G051100	1.02382	0.000770638	1.75991	0.000108
Glyma.13G054800	0.439305	0.00110636	0.617277	0.0451145
Glyma.13G056600	0.930749	0.000305604	1.71704	0.000646
Glyma.13G066500	0.582569	0.000473722	0.885616	0.000729
Glyma.13G077800	1.03334	0.0216612	4.17128	0.000156
Glyma.13G101500	0.666312	0.00715192	1.27843	6.04e-06
Glyma.13G109800	1.26661	3.11e-25	1.31625	0.0198141
Glyma.13G112200	0.428445	0.000473722	0.88561	1.27e-05
Glyma.13G114000	0.225817	0.0227094	0.702172	8.91e-05
Glyma.13G127500	0.59165	0.00303199	1.07466	9.79e-05
Glyma.13G131300	0.383805	0.0184337	0.611432	0.0249141
Glyma.13G139200	0.714613	2.08e-06	0.887156	0.00199627
Glyma.13G149700	0.722759	0.000315154	1.5912	1.61e-05
Glyma.13G151800	1.77143	4.15e-07	2.86923	1.38e-10
Glyma.13G152500	1.06345	0.00773414	2.45669	0.000636
Glyma.13G157400	1.47498	5.37e-18	1.26749	0.00617937
Glyma.13G164300	1.24266	2.03e-11	1.03277	0.0315582
Glyma.13G179300	0.756058	0.00069419	0.720364	0.0290401
Glyma.13G185000	0.459984	0.0487053	0.723467	0.0104289
Glyma.13G199300	0.697488	0.000319789	1.92054	0.00211214
Glyma.13G205200	0.962972	0.00016865	1.45469	0.0125997
Glyma.13G212800	0.401707	0.00622006	0.87609	0.0134499
Glyma.13G222300	0.589459	0.0415881	1.1013	0.000186
Glyma.13G231700	0.760002	0.00225746	1.66454	5.37e-05
Glyma.13G236600	1.16054	2.59e-07	0.928317	0.0388935
Glyma.13G238700	0.443059	0.0298814	0.712696	0.0444992
Glyma.13G241100	0.505028	0.00624726	0.629361	0.032528
Glyma.13G241800	0.382603	0.016091	0.594834	0.0329052
Glyma.13G264200	0.903942	0.0394073	2.20351	0.000879
Glyma.13G270100	1.59266	2.18e-07	1.81492	0.0367496
Glyma.13G277000	1.26204	3.85e-13	1.12943	0.000286
Glyma.13G279200	1.44952	0.000230482	2.57943	0.0341863
Glyma.13G285400	0.737366	0.00506104	1.89668	0.000223
Glyma.13G287100	0.506104	0.000156278	0.454086	0.0324861
Glyma.13G299100	1.40719	2.71e-05	2.58688	2.4e-06
Glyma.13G310500	0.616403	6.12e-05	0.91287	0.000135
Glyma.13G310900	0.407178	0.000393838	0.537215	0.0442557
Glyma.13G327700	1.02916	0.00619903	2.09632	0.00168499
Glyma.13G340900	0.774072	1.79e-05	0.769045	0.0157386
Glyma.13G344500	0.379908	0.00589871	0.667289	0.00332999
Glyma.13G346300	0.662006	2.31e-06	0.561086	0.00441911
Glyma.13G360600	1.59407	2.1e-08	1.18553	0.00790595
Glyma.13G366600	0.470506	0.0292477	0.708228	0.0183164
Glyma.14G002000	0.774007	0.000135431	1.28183	3.39e-05
Glyma.14G010600	1.90393	3.34e-12	2.12579	5.15e-08
Glyma.14G023500	0.656066	0.0487053	1.13077	0.000231
Glyma.14G051800	1.98555	8.69e-13	2.60593	0.0363465
Glyma.14G060200	0.646379	0.000896909	0.9225	0.000467
Glyma.14G073200	1.3002	5.07e-08	1.67712	3.64e-06
Glyma.14G079600	0.67933	0.000374091	0.820363	0.00837065
Glyma.14G083000	0.503094	0.00882923	0.84177	0.0194662
Glyma.14G089600	0.48025	4.92e-05	0.464954	0.0150806
Glyma.14G090400	0.926883	0.000315512	1.6894	1.88e-05
Glyma.14G098200	1.07015	0.000264571	1.28814	0.0127727
Glyma.14G101500	0.767173	1.6e-06	0.972794	0.00466549
Glyma.14G105500	0.716173	0.000270484	0.790517	0.0235363
Glyma.14G111800	1.22707	1.2e-07	2.11899	1.91e-09
Glyma.14G119800	0.621738	0.00463354	1.15325	0.000244
Glyma.14G121200	1.26822	0.000652795	2.80368	0.000255
Glyma.14G156300	1.75865	1.3e-05	3.41735	0.00121108
Glyma.14G171100	1.67811	4.74e-05	4.50299	0.00842975
Glyma.14G182700	0.598037	0.0465832	0.809021	0.010305
Glyma.14G193700	0.592569	0.000132529	0.567612	0.00470699
Glyma.14G207200	0.405954	0.0343051	0.638901	0.00639272
Glyma.14G216100	0.692799	0.00801057	1.79336	0.00770417
Glyma.15G003400	0.498278	0.019743	0.85023	0.000328
Glyma.15G008700	0.529072	0.000799532	0.565851	0.0314027
Glyma.15G011200	1.23925	0.00450255	3.34482	5.21e-06
Glyma.15G023300	0.523758	0.0487441	0.993609	0.018837
Glyma.15G024500	0.662596	0.000168919	0.87781	0.00188224
Glyma.15G031200	0.331142	0.0199135	0.996828	0.000729
Glyma.15G033100	0.588165	0.00267244	0.836545	0.000207
Glyma.15G038200	0.3745	0.0143731	0.640633	0.0251771
Glyma.15G042700	0.383549	0.0207631	0.635573	0.00655174
Glyma.15G063100	1.11441	6.89e-08	1.08944	0.00142216
Glyma.15G071400	1.08212	9.46e-05	1.22993	0.000595
Glyma.15G071600	0.558065	0.000247835	0.715283	0.0208873
Glyma.15G077000	1.40266	7.19e-08	1.53957	0.000615
Glyma.15G092400	0.510127	0.000606566	0.443631	0.0172173
Glyma.15G094800	0.45185	0.00414284	0.52236	0.0438502
Glyma.15G101600	1.05399	0.000434043	1.31375	0.0161772
Glyma.15G107300	0.647946	1.79e-05	0.797723	0.0303162
Glyma.15G110700	0.362094	0.0321245	0.635125	0.0193871
Glyma.15G123600	0.557755	0.00503976	0.777796	0.000171
Glyma.15G145600	3.09137	1.42e-16	4.73128	0.010738
Glyma.15G191600	0.503532	0.0117761	0.902309	0.000476
Glyma.15G193200	1.12692	0.00553462	2.09841	6.4e-07
Glyma.15G194900	0.625225	0.000568563	0.923925	0.00118755
Glyma.15G198300	0.407228	0.0343864	0.84878	0.000535
Glyma.15G198900	1.0403	5.29e-05	1.30989	0.00130615
Glyma.15G208600	0.632846	0.000612272	1.07756	0.004122
Glyma.15G217700	0.70803	0.000139491	1.80786	5.34e-09
Glyma.15G232700	0.475546	0.0126841	0.701705	0.00304658
Glyma.15G237600	0.525626	5.7e-06	1.53484	0.000155
Glyma.15G251600	0.462963	4.02e-06	0.490005	0.0314662
Glyma.15G273000	0.539382	0.00684011	0.880207	2.14e-05
Glyma.16G008500	1.30651	1.07e-11	2.36464	9.16e-07
Glyma.16G010200	0.742335	0.0437391	2.45331	3.07e-07
Glyma.16G013600	0.853772	0.000210804	1.33077	2.2e-05
Glyma.16G037600	1.48492	3.53e-12	1.7325	3.26e-07
Glyma.16G062000	0.871754	0.000173958	1.46652	1.26e-05
Glyma.16G071500	0.50787	0.0056857	1.28425	0.00432962
Glyma.16G088400	0.578363	0.000908014	0.662634	0.0155669
Glyma.16G105300	0.681085	0.000669525	1.24154	0.000831
Glyma.16G107000	1.0227	0.00125716	1.76731	2.45e-05
Glyma.16G129000	0.455683	0.000400887	0.468381	0.0239601
Glyma.16G145600	1.89855	3.46e-30	1.09039	0.0378899
Glyma.16G146500	0.404942	0.0023886	0.513248	0.0162782
Glyma.16G200600	0.972747	0.00895257	2.2124	5.93e-07
Glyma.16G204600	0.715397	0.00162684	1.70299	7.62e-09
Glyma.16G212400	1.95401	8.95e-23	2.02866	0.0143147
Glyma.16G212500	1.33912	0.00148819	3.28409	0.00278185
Glyma.17G016300	1.43529	5.33e-14	1.19466	1.17e-05
Glyma.17G052900	0.753997	7.5e-06	0.797575	0.0289673
Glyma.17G061500	0.734397	0.000264571	0.838649	0.00204009
Glyma.17G064800	0.969815	0.0161238	1.52175	0.00127118
Glyma.17G068100	0.763263	0.0135831	1.12956	0.00478835
Glyma.17G068200	0.791471	0.00211814	1.26875	0.001049
Glyma.17G092600	0.863592	0.00767243	1.36094	0.00205786
Glyma.17G094200	0.790126	0.000183909	0.686897	0.0240328
Glyma.17G094400	0.643082	7.93e-05	0.774873	7.51e-06
Glyma.17G117100	0.828273	0.00341116	2.65601	1.75e-06
Glyma.17G117200	1.06558	1.28e-07	1.84845	1.96e-06
Glyma.17G129600	1.01889	7.85e-07	1.70142	8.59e-05
Glyma.17G132400	0.778582	0.000161617	1.01724	0.00627577
Glyma.17G147400	1.91077	2.02e-06	4.16721	0.0448306
Glyma.17G161700	0.783561	0.000302795	1.25992	0.0134735
Glyma.17G187300	0.82271	1.12e-07	0.880467	0.0001
Glyma.17G213600	0.810741	1.72e-06	0.975007	0.000176
Glyma.17G216000	0.911607	6.94e-08	1.12158	0.000368
Glyma.17G218200	0.559373	0.0221191	1.43667	0.000457
Glyma.17G225800	0.388542	0.0473593	0.509345	0.0191725
Glyma.17G233700	1.14109	2.54e-11	1.81766	5.18e-06
Glyma.17G238200	0.589934	0.0112994	1.09923	0.00349402
Glyma.17G251800	0.725404	0.00212012	1.094	0.0014592
Glyma.17G259200	0.505749	0.0137167	0.891589	1.26e-05
Glyma.18G002800	0.913649	0.0282169	0.678059	0.00572813
Glyma.18G009700	0.435977	6.56e-07	0.953256	0.000152
Glyma.18G011600	0.836754	0.0319954	2.58794	0.000257
Glyma.18G029300	0.556887	0.0195407	1.22646	0.00124797
Glyma.18G045200	1.25529	4.84e-05	2.65573	9.97e-07
Glyma.18G050700	0.427651	0.00105061	0.585556	0.0202824
Glyma.18G055200	0.407294	0.0483887	0.770702	0.00279257
Glyma.18G063500	1.19055	2.37e-06	1.80381	1.75e-06
Glyma.18G064900	0.937755	2.24e-05	0.774249	0.0127918
Glyma.18G068800	1.02994	0.000428852	2.26316	4.63e-07
Glyma.18G085200	0.73725	0.000588604	1.20944	0.00332999
Glyma.18G119200	1.10007	0.000213921	2.69505	1.38e-10
Glyma.18G205400	1.0086	0.0107364	1.8133	0.000431
Glyma.18G238000	1.29462	3.43e-06	1.39635	0.0120914
Glyma.18G241800	1.0923	4.97e-13	0.849815	0.00248175
Glyma.18G254100	0.57226	0.000903905	1.8759	0.000228
Glyma.18G258400	0.712049	0.00422343	1.68836	6.07e-09
Glyma.18G258600	0.393461	0.0491827	0.545983	0.0337785
Glyma.18G263200	1.48262	0.000397484	4.61327	0.0171576
Glyma.18G272400	2.39017	4.46e-11	1.37117	0.000128
Glyma.18G278200	0.278411	0.0308926	0.645015	0.00549069
Glyma.18G290400	1.21443	0.0053899	3.94186	0.000655
Glyma.18G294300	1.68957	5.03e-14	2.15166	7.69e-06
Glyma.18G297100	0.318083	0.00174469	0.637359	0.02048
Glyma.19G000700	1.26612	0.000270952	2.60425	3.43e-12
Glyma.19G001600	0.542082	4.97e-09	0.780176	0.00183539
Glyma.19G017200	1.67031	1.24e-10	1.99879	3.17e-09
Glyma.19G018100	0.489885	0.0188766	0.909611	0.000535
Glyma.19G020500	0.451963	0.00700878	0.555803	0.0120914
Glyma.19G025100	0.858036	0.00103216	1.93408	4.63e-05
Glyma.19G033500	1.36579	1.69e-06	1.28232	0.00617937
Glyma.19G046300	0.88108	0.0269789	2.25771	1.71e-08
Glyma.19G069300	0.399023	0.0146948	0.798554	0.0123502
Glyma.19G071300	0.727043	0.0151144	1.03764	0.00548861
Glyma.19G076800	2.03503	3.27e-07	3.80756	0.0031548
Glyma.19G091200	0.829575	0.000341983	0.839045	0.00260174
Glyma.19G115300	0.873861	1.66e-06	1.47979	1.17e-08
Glyma.19G115600	0.829559	8.62e-05	1.73246	8.39e-10
Glyma.19G166500	1.21588	3.8e-09	1.17584	0.000478
Glyma.19G169000	0.366885	0.00818068	0.58898	0.0268559
Glyma.19G197100	1.5968	9.65e-16	1.23176	0.00245654
Glyma.19G212800	1.49311	1.84e-11	1.98389	2.24e-08
Glyma.19G218300	0.806738	0.0384715	2.48942	8.3e-08
Glyma.19G220000	0.543969	0.00572692	0.734903	0.00208807
Glyma.19G228700	0.719077	2.98e-08	0.762083	0.000136
Glyma.19G230600	0.41004	0.0171663	0.622919	0.00499662
Glyma.19G231000	1.45646	4.21e-06	2.05679	0.00673193
Glyma.19G241500	1.19478	0.00117678	3.2172	0.00894147
Glyma.19G260900	0.653279	0.00070452	1.84539	0.00141872
Glyma.19G263300	1.72096	4.87e-12	1.39615	0.0122038
Glyma.20G005300	1.2649	0.000275238	1.3604	0.0262285
Glyma.20G013500	0.76215	0.000107204	1.11372	0.00129629
Glyma.20G065600	0.385439	0.0049519	0.486462	0.0384388
Glyma.20G068000	0.776219	6.73e-09	1.0768	0.00316299
Glyma.20G092400	0.421757	0.00119597	0.930251	0.000147
Glyma.20G098300	1.24752	0.00391317	3.30868	0.000956
Glyma.20G110900	0.719585	0.00419436	0.839166	0.038933
Glyma.20G113800	1.1494	0.00207832	1.85829	0.0162782
Glyma.20G114200	1.17175	1e-22	0.8337	0.00556198
Glyma.20G117000	1.20256	0.00216129	2.42092	0.00287442
Glyma.20G151500	0.740021	0.00264638	1.0932	0.000347
Glyma.20G168500	1.96589	1.02e-08	2.16626	0.000172
Glyma.20G181900	0.425459	0.0372247	0.970985	0.001278
Glyma.20G194400	0.813034	0.0226888	0.994613	0.0109864
Glyma.20G209000	0.481498	0.00730331	0.786317	0.000199
Glyma.20G210100	1.51375	9.75e-10	2.12161	7.52e-09
Glyma.20G210800	0.840089	0.00116939	1.27205	9.38e-06
Glyma.20G227200	0.378102	0.0148562	0.552602	0.0171576
Glyma.20G236200	0.834937	1.19e-09	0.597499	0.0191349
Glyma.20G237900	0.379536	0.00247598	0.735556	0.0069833
Glyma.U024900	0.741452	0.00916882	1.29536	6.37e-09
Glyma.U029900	0.961131	0.00846091	2.34468	4.53e-05
Glyma.U038300	0.423751	0.0431612	0.89788	0.0115352
1Adjusted P-value at 0.05 with Benjamini Hochberg procedure.
