# Supplementary material for: RNA-Seq Dissects Incomplete Activation of Phytoalexin Biosynthesis by the Soybean Transcription Factors GmMYB29A2 and GmNAC42-1
Source: Plants (Basel). 2023 Jan 25;12(3):545. doi: 10.3390/plants12030545 (PMC9921300; doi:10.3390/plants12030545)
Supplement: Supplementary file 1 [file plants-12-00545-s001.zip › Supplemental Table S3. Genes commonly upregulated by WGE, p35S-GmMYB29A2 and p35S-GmNAC42-1_.xlsx]

## Sheet: Sheet1
Supplemental Table S3. Genes commonly upregulated by WGE, p35S::GmMYB29A2 and p35S::GmNAC42-1.
Wm82.a2 (Glyma 2.0)	WGEvsH2O, empty vector log2FoldChange	WGEvsH2O, empty vector adjusted P-value1	p35S::GmMYB29A2 vsVector, H2O log2FoldChange	p35S::GmMYB29A2 vsVector, H2O adjusted P-value1	p35S::GmNAC42-1 vsVector, H2O log2FoldChange	p35S::GmNAC42-1 vsVector, adjusted P-value1
GLYMA.01G006200	0.50139	0.015001	0.499596	0.0340499	0.710577	0.0166055
GLYMA.01G096000	1.07683	6.72e-06	1.20588	3.49e-07	0.944307	0.0208873
GLYMA.01G161100	0.642087	5.28e-08	0.350438	0.015268	0.663316	0.0198862
GLYMA.01G210400	2.66344	6.82e-32	2.91595	6.94e-08	2.86484	2.86e-08
GLYMA.02G018300	0.592059	0.0170997	0.605641	0.0054275	0.907732	0.00065
GLYMA.02G026300	0.626515	0.000668528	0.581395	0.000152	0.696546	0.00730765
GLYMA.02G041900	0.539389	0.00249443	0.765525	6.3e-06	1.14679	0.00095
GLYMA.02G049700	0.703294	0.00742068	0.837088	0.000139	0.875257	0.0211999
GLYMA.02G063900	1.59768	1.25e-10	1.58187	0.0110974	1.78417	0.0387319
GLYMA.02G089500	1.34125	3.25e-31	0.655488	0.000428	0.76693	0.0384388
GLYMA.02G106700	0.980312	8.66e-15	0.621084	0.000233	0.715495	0.0114029
GLYMA.02G136700	0.729689	0.00011219	1.6451	7.68e-13	1.22386	0.00538869
GLYMA.02G137200	0.77934	0.00218166	0.60246	0.0002	1.13465	0.0099265
GLYMA.02G146100	1.34369	1.59e-06	1.26288	0.0162123	1.67255	0.0122189
GLYMA.02G155600	1.41309	1.94e-19	1.3702	2.44e-07	1.22309	0.0178169
GLYMA.02G157800	0.469795	0.00736592	0.370419	0.0418378	0.583848	0.0295236
GLYMA.02G157900	1.48835	4.1e-06	0.677553	0.0206686	2.02076	1.11e-10
GLYMA.02G158200	0.74794	0.00501646	0.816365	2.32e-06	1.17275	0.000586
GLYMA.02G224200	0.730513	0.00119366	0.42283	0.0383398	1.18527	2.74e-05
GLYMA.02G265900	1.37292	6.93e-06	1.19136	0.00312604	2.71755	5.86e-08
GLYMA.02G284300	1.67725	3.02e-07	2.39642	0.00242859	6.84678	3.13e-10
GLYMA.03G134800	0.921555	0.00222902	1.68025	1.6e-09	1.51705	0.00065
GLYMA.03G216300	0.818675	0.0474101	0.808933	0.00572507	2.04126	4.17e-06
GLYMA.04G032100	0.772996	0.00275085	0.502473	0.015087	1.20133	0.000135
GLYMA.04G086700	1.78463	5.11e-19	1.20402	0.0410841	1.9748	0.00100071
GLYMA.04G123100	0.804616	9.62e-06	0.477905	0.0460739	0.563486	0.0482159
GLYMA.04G138600	0.690834	0.0226305	0.78961	0.0259775	2.0017	3.9e-06
GLYMA.05G055000	0.96867	9.08e-10	0.422269	0.0261021	0.728661	0.000368
GLYMA.05G068600	0.489814	0.0160131	0.97821	4.39e-08	0.655019	0.0337814
GLYMA.06G148400	0.873636	0.0496181	2.15026	0.0102887	2.29509	0.0122038
GLYMA.06G249400	2.27906	5.23e-15	1.40065	0.00676666	2.11655	0.00122457
GLYMA.07G004600	0.713704	0.00242294	0.493751	0.0253112	0.762525	0.0100858
GLYMA.07G025200	0.308033	0.0351243	0.383037	0.0312941	0.549344	0.0218108
GLYMA.07G034400	1.17036	8.24e-07	0.710365	0.0451144	1.10052	0.0151
GLYMA.07G039700	1.11427	0.000475263	1.51207	0.00251095	2.36669	7.72e-05
GLYMA.07G045700	0.534263	0.0394202	1.38221	5.12e-08	1.28668	0.000363
GLYMA.07G125500	0.934261	0.0104154	0.821694	0.0232279	1.43649	0.000791
GLYMA.07G139200	0.727598	6.73e-08	0.731771	3.08e-05	0.798432	0.00513038
GLYMA.07G142000	0.660054	0.000314782	0.589	0.00971176	0.684974	0.0375144
GLYMA.07G177600	1.37208	7.02e-09	0.842402	0.00140708	1.21574	0.00323238
GLYMA.07G197100	1.06065	0.00648469	2.70255	9.97e-12	2.55313	0.000542
GLYMA.07G216600	0.981323	8.69e-07	0.440293	0.0077135	1.06456	0.00464505
GLYMA.08G042100	1.63162	5.43e-08	2.02605	8.39e-05	1.70606	0.0130066
GLYMA.08G058400	0.631087	0.00118386	0.406331	0.0303614	0.611542	0.0132025
GLYMA.08G079100	1.43707	2.99e-09	1.03456	3.86e-05	1.14762	0.0253615
GLYMA.08G175200	0.72724	4.26e-20	1.38566	6.32e-07	0.847665	0.030961
GLYMA.08G298900	0.910543	9.5e-06	0.533128	0.00349582	0.614387	0.048448
GLYMA.08G364700	2.88961	3.74e-27	1.62747	0.0010663	2.52256	5.43e-06
GLYMA.09G045600	1.27094	2.18e-07	0.662953	0.000739	1.70995	1.49e-12
GLYMA.09G065000	0.739963	3.84e-09	0.645909	0.00021	0.774678	0.00953353
GLYMA.09G161100	1.5939	1.39e-20	0.650347	0.00562068	0.733882	0.01745
GLYMA.09G173200	1.19932	7.95e-07	0.702079	0.000697	1.436	2e-06
GLYMA.09G269400	2.25996	7.94e-09	4.54607	8.39e-05	4.67565	0.000198
GLYMA.09G277000	0.864299	1.94e-07	0.503242	0.00843847	0.80438	0.0013159
GLYMA.10G006600	2.48349	1.66e-17	1.79389	0.0138664	2.137	0.0315018
GLYMA.10G132300	0.693876	8.33e-07	0.760412	0.000271	1.03308	0.00132717
GLYMA.10G248000	0.561375	0.000624072	0.399131	0.0162634	0.560349	0.0331346
GLYMA.10G277900	0.311988	0.0299649	0.39041	0.024394	0.568567	0.0122038
GLYMA.10G294900	0.308541	0.0146583	0.416386	0.00780021	0.422281	0.0361667
GLYMA.11G070200	1.80255	1.18e-26	0.440165	8.68e-05	1.14005	0.010752
GLYMA.11G071100	1.50284	4.47e-08	1.68215	0.00242534	1.63024	0.038027
GLYMA.11G108000	0.331593	0.0213237	0.777079	0.0162742	1.30824	0.00101485
GLYMA.11G154700	0.576706	0.0105926	1.43212	0.000645	1.84367	0.000135
GLYMA.11G192800	0.820917	7.91e-07	0.915888	0.00789238	1.45484	0.000103
GLYMA.11G232200	0.506348	0.001649	0.574617	0.00161971	0.771706	0.0168754
GLYMA.11G243500	1.09284	5.24e-07	0.739064	0.00927619	1.29277	0.000236
GLYMA.12G031700	0.531779	0.00472388	0.82938	0.000735	0.742024	0.0191782
GLYMA.12G137700	1.64219	9.47e-10	1.17917	0.00636067	1.93095	0.000277
GLYMA.13G109800	1.26661	3.11e-25	2.6045	8.46e-05	1.31625	0.0198141
GLYMA.13G157400	1.47498	5.37e-18	0.901308	0.000629	1.26749	0.00617937
GLYMA.13G205200	0.962972	0.00016865	1.53801	0.000321	1.45469	0.0125997
GLYMA.13G310900	0.407178	0.000393838	0.470719	0.00221111	0.537215	0.0442557
GLYMA.14G079600	0.67933	0.000374091	0.53968	0.00259411	0.820363	0.00837065
GLYMA.14G098200	1.07015	0.000264571	1.12038	0.0197966	1.28814	0.0127727
GLYMA.14G216100	0.692799	0.00801057	1.28063	0.0259299	1.79336	0.00770417
GLYMA.15G198300	0.407228	0.0343864	0.385087	0.0113669	0.84878	0.000535
GLYMA.15G251600	0.462963	4.02e-06	0.856891	1.46e-05	0.490005	0.0314662
GLYMA.16G008500	1.30651	1.07e-11	1.06178	0.00597991	2.36464	9.16e-07
GLYMA.16G013600	0.853772	0.000210804	0.979387	3.15e-08	1.33077	2.2e-05
GLYMA.16G145600	1.89855	3.46e-30	0.811279	0.0128426	1.09039	0.0378899
GLYMA.16G212400	1.95401	8.95e-23	1.34847	0.000413	2.02866	0.0143147
GLYMA.18G029300	0.556887	0.0195407	0.889831	1.26e-05	1.22646	0.00124797
GLYMA.18G064900	0.937755	2.24e-05	0.385477	0.0175483	0.774249	0.0127918
GLYMA.18G254100	0.57226	0.000903905	2.23386	1.34e-14	1.8759	0.000228
GLYMA.18G294300	1.68957	5.03e-14	1.43798	1.06e-05	2.15166	7.69e-06
GLYMA.19G033500	1.36579	1.69e-06	0.832372	0.00294549	1.28232	0.00617937
GLYMA.19G076800	2.03503	3.27e-07	2.50907	1.13e-05	3.80756	0.0031548
GLYMA.19G197100	1.5968	9.65e-16	0.66382	0.00287157	1.23176	0.00245654
GLYMA.19G260900	0.653279	0.00070452	1.25465	0.00281681	1.84539	0.00141872
GLYMA.19G263300	1.72096	4.87e-12	1.62988	3.48e-05	1.39615	0.0122038
GLYMA.20G013500	0.76215	0.000107204	0.553835	0.00274471	1.11372	0.00129629
1Adjusted P-value at 0.05 with Benjamini Hochberg procedure.
