# Supplementary material for: RNA-Seq Dissects Incomplete Activation of Phytoalexin Biosynthesis by the Soybean Transcription Factors GmMYB29A2 and GmNAC42-1
Source: Plants (Basel). 2023 Jan 25;12(3):545. doi: 10.3390/plants12030545 (PMC9921300; doi:10.3390/plants12030545)
Supplement: Supplementary file 1 [file plants-12-00545-s001.zip › Supplemental Table S4. Genes commonly downregulated by WGE and p35S-GmMYB29A2_.xlsx]

## Sheet: Sheet1
Supplemental Table S4. Genes commonly downregulated by WGE and p35S::GmMYB29A2.
Wm82.a2 (Glyma 2.0)	WGEvsH2O, empty vector log2FoldChange	WGEvsH2O, empty vector adjusted P-value1	p35S::GmMYB29A2vsVector, H2O log2FoldChange	p35S::GmMYB29A2vsVector, H2O adjusted P-value
Glyma.01G001500	-0.839447	8.24e-07	-2.4258	7.21e-06
Glyma.01G009200	-1.15066	6.52e-11	-1.38663	2.75e-07
Glyma.01G022700	-0.407283	0.0440682	-0.465864	0.0462295
Glyma.01G023300	-0.859136	3.8e-07	-0.724727	0.00330265
Glyma.01G026100	-0.29708	0.0167024	-0.621714	3.4e-07
Glyma.01G030900	-0.483168	3.68e-05	-0.552113	0.0494973
Glyma.01G041200	-1.22766	6.21e-05	-1.38098	0.00409266
Glyma.01G046300	-1.1226	0.00193979	-1.42585	0.000255
Glyma.01G050100	-1.5048	4.34e-14	-1.97395	2.54e-10
Glyma.01G063000	-0.555489	0.00752077	-0.957187	0.00890579
Glyma.01G081300	-0.610292	0.00537635	-1.77308	1.08e-06
Glyma.01G081600	-1.00871	4.06e-06	-1.99048	2.08e-09
Glyma.01G097900	-0.683237	0.0326017	-1.34209	0.000949
Glyma.01G103500	-0.557845	0.00248832	-0.75124	4.65e-06
Glyma.01G109300	-0.435516	0.0154723	-0.637531	0.000968
Glyma.01G110200	-0.525534	0.0266738	-0.914108	0.00583428
Glyma.01G112900	-1.22962	2.56e-06	-0.789857	0.0423216
Glyma.01G116700	-0.942422	5.88e-05	-1.31802	7.16e-06
Glyma.01G120400	-0.462093	0.0284809	-0.699482	0.00474613
Glyma.01G133900	-0.795062	0.00670085	-1.33616	0.00461305
Glyma.01G154400	-0.335471	0.026664	-0.88801	0.000149
Glyma.01G156200	-0.444124	0.00120307	-0.511374	8.15e-05
Glyma.01G157300	-0.72084	0.00861385	-0.961662	0.000761
Glyma.01G157500	-0.503	6.58e-05	-0.545114	0.00993571
Glyma.01G183100	-0.498784	0.00270564	-1.16899	0.000221
Glyma.01G186600	-0.459313	0.0185531	-0.324682	0.0473401
Glyma.01G190900	-0.578508	0.0263224	-1.71071	3.73e-05
Glyma.01G223900	-0.918173	0.000484461	-1.11251	0.0443267
Glyma.01G229800	-0.909708	0.023833	-1.22983	0.000482
Glyma.01G231400	-0.397105	0.0233828	-0.552143	0.00828122
Glyma.01G233600	-0.325953	0.0368474	-0.513709	0.0194274
Glyma.01G236400	-0.306148	0.0109455	-0.601423	0.0459461
Glyma.02G019100	-0.666223	4.86e-06	-0.613529	0.0106616
Glyma.02G020000	-0.582494	0.0293073	-0.998236	0.00501232
Glyma.02G048600	-1.35207	0.00134962	-1.83975	0.0121371
Glyma.02G111900	-0.823973	0.000824512	-0.956481	0.0499628
Glyma.02G135500	-1.11782	0.000506951	-1.70457	4.03e-07
Glyma.02G140100	-0.483716	0.00906565	-0.873989	0.00131767
Glyma.02G235200	-1.19065	4.26e-05	-1.7255	0.0025745
Glyma.02G308700	-0.627312	0.00114483	-0.967839	0.00498245
Glyma.03G005600	-0.801591	0.0432528	-0.746557	0.000882
Glyma.03G007400	-0.36769	0.0238251	-0.693173	0.000145
Glyma.03G013400	-1.14705	1.27e-09	-1.01686	0.00115113
Glyma.03G014600	-0.515118	0.00104053	-0.586922	0.00970284
Glyma.03G032800	-0.955447	3.1e-09	-0.830995	0.00718402
Glyma.03G035400	-0.591834	0.00756774	-1.86306	5.07e-09
Glyma.03G039800	-1.13031	0.0104323	-4.33683	0.00715691
Glyma.03G055200	-1.03578	0.0008702	-1.00256	0.00281237
Glyma.03G070500	-0.485273	0.00311765	-0.428284	0.0399065
Glyma.03G078300	-0.68797	0.0190122	-0.837421	0.0118753
Glyma.03G086800	-0.61283	2.64e-09	-0.500975	0.00796183
Glyma.03G102700	-0.459246	0.0250117	-0.650539	0.00299674
Glyma.03G105700	-0.670595	0.00762081	-0.831643	0.0015474
Glyma.03G122500	-0.299503	0.00261287	-1.27428	3.18e-07
Glyma.03G131200	-1.21904	1.68e-06	-1.25758	0.000153
Glyma.03G132700	-0.50032	0.0267834	-1.54022	0.041528
Glyma.03G136500	-0.613836	0.00275085	-0.9833	0.018442
Glyma.03G142200	-0.251069	0.0255873	-0.498735	0.00689401
Glyma.03G144800	-0.564706	0.000303024	-0.678717	0.0163748
Glyma.03G153800	-0.348942	0.0157282	-0.84721	0.000927
Glyma.03G164200	-1.28656	0.00187514	-2.20615	0.00772773
Glyma.03G171100	-0.37578	0.0281801	-0.500032	0.00202299
Glyma.03G180300	-0.341638	0.012813	-0.935475	4.52e-05
Glyma.03G190500	-0.332151	0.0311661	-0.473224	0.00961121
Glyma.03G217500	-0.585243	0.00219234	-0.795259	0.0142997
Glyma.03G222300	-0.580029	0.000139491	-0.708195	2.34e-05
Glyma.03G223000	-0.340486	0.0148728	-0.807602	0.000515
Glyma.03G232100	-0.690354	0.0217008	-0.946481	0.0440492
Glyma.03G240000	-0.669393	1.25e-05	-0.719196	0.00148674
Glyma.04G019500	-0.467613	0.0100852	-0.972934	5.69e-07
Glyma.04G023700	-0.488186	0.0115293	-0.8455	4.18e-05
Glyma.04G027400	-2.31732	7.28e-10	-1.53372	0.000785
Glyma.04G036100	-1.80837	1.86e-10	-1.38556	0.00585119
Glyma.04G042000	-0.37714	0.0441858	-0.809322	0.000852
Glyma.04G046200	-0.510896	0.0449175	-0.595681	0.0342929
Glyma.04G047900	-0.518312	0.0292477	-0.936293	0.00129294
Glyma.04G060200	-0.719592	0.0426697	-1.33993	0.007385
Glyma.04G069500	-0.694164	0.0153306	-1.34571	0.000881
Glyma.04G069800	-0.914794	0.0162523	-2.82958	0.0134272
Glyma.04G076300	-0.319768	0.044965	-0.360879	0.0207969
Glyma.04G078400	-0.67711	0.0224813	-1.0539	0.0146329
Glyma.04G083200	-0.977279	2.1e-06	-0.446826	0.00238716
Glyma.04G088500	-0.668302	0.00382465	-1.53952	4.51e-07
Glyma.04G091800	-0.481679	0.0229165	-1.83503	3.56e-07
Glyma.04G094600	-0.610821	5.94e-06	-0.58596	0.00585303
Glyma.04G136000	-0.548024	1.96e-05	-0.766444	0.000231
Glyma.04G150900	-0.742065	0.00769247	-2.07426	4.37e-08
Glyma.04G165600	-0.466991	0.00620327	-0.670053	0.0169099
Glyma.04G200900	-0.659576	3.08e-05	-1.08083	0.000215
Glyma.04G202900	-0.549672	0.00077091	-0.567413	0.0117296
Glyma.04G222100	-0.940021	1.6e-06	-1.70579	3.15e-06
Glyma.04G249700	-1.05211	0.00261151	-0.906055	0.00104396
Glyma.04G250300	-0.543953	0.012813	-1.0557	0.00137454
Glyma.04G252300	-0.401087	0.0261008	-1.58894	2.29e-07
Glyma.04G256100	-0.468801	0.00185704	-0.597492	0.0116882
Glyma.05G032600	-0.450442	0.00281979	-1.01043	0.000103
Glyma.05G033000	-0.51913	0.00825191	-1.35805	1.74e-05
Glyma.05G038400	-0.969931	0.008156	-1.15166	0.0168754
Glyma.05G056100	-0.507611	0.0109482	-1.23861	5.49e-06
Glyma.05G057100	-0.562709	0.0284403	-1.65927	4.21e-09
Glyma.05G057500	-0.667672	0.00265161	-2.24981	5.76e-05
Glyma.05G062400	-0.557565	3.08e-06	-0.457923	0.0156774
Glyma.05G070000	-0.335049	0.00834684	-0.502637	0.0139984
Glyma.05G070200	-0.450669	0.0154821	-0.815104	0.00256774
Glyma.05G073100	-0.829602	0.0168032	-1.92117	0.000309
Glyma.05G075100	-1.23885	2.63e-11	-0.750173	0.00492866
Glyma.05G102100	-0.634821	0.00761064	-1.40258	6.39e-08
Glyma.05G102800	-0.649077	0.0267024	-1.02024	0.0287215
Glyma.05G110000	-0.427107	0.0417737	-1.04275	1.19e-07
Glyma.05G110200	-0.511445	0.00203204	-1.29322	9.82e-06
Glyma.05G129600	-0.538737	0.0188759	-0.646811	0.0164386
Glyma.05G138100	-1.11119	5.55e-08	-1.55424	2.96e-05
Glyma.05G150400	-0.651341	0.0013728	-0.938816	1.86e-05
Glyma.05G152100	-0.472456	0.00918243	-0.684518	0.0115247
Glyma.05G168600	-0.361178	0.0400167	-0.529928	0.0314774
Glyma.05G178700	-0.414491	0.00396031	-0.523628	0.0156088
Glyma.05G181600	-0.43491	0.0301644	-1.30906	4.99e-06
Glyma.05G195500	-0.668456	0.00529726	-0.697599	0.00496444
Glyma.05G197200	-0.663715	6.09e-05	-0.798783	0.000669
Glyma.05G197900	-1.12408	2.37e-08	-1.02675	0.0454268
Glyma.05G207500	-0.537973	0.0164838	-1.34447	0.00014
Glyma.05G208500	-1.33563	1.12e-06	-1.89949	8.3e-06
Glyma.05G216400	-0.638292	0.000279512	-0.609056	0.0350463
Glyma.05G229100	-0.467047	0.00781739	-0.643346	0.0198308
Glyma.06G013100	-0.427663	0.00400599	-0.642666	0.00341905
Glyma.06G016900	-1.20564	6.33e-11	-0.98165	0.00568416
Glyma.06G023900	-0.61586	0.00235113	-0.789704	0.00109232
Glyma.06G025200	-0.774677	0.0202962	-1.56123	0.000556
Glyma.06G027500	-1.79446	7.56e-09	-0.585204	0.0196882
Glyma.06G029900	-0.365414	0.0392771	-0.609229	0.0104599
Glyma.06G036200	-0.472419	0.00147324	-0.738484	0.000796
Glyma.06G041300	-0.578022	1.97e-08	-0.782064	3.53e-06
Glyma.06G048300	-0.712772	0.00166121	-0.659058	0.0496346
Glyma.06G051500	-0.521677	0.0382464	-1.24466	0.000295
Glyma.06G064000	-0.657175	0.00106191	-1.5605	3.47e-05
Glyma.06G067900	-0.932672	0.0264565	-2.62423	0.00777227
Glyma.06G076100	-0.580012	0.000447557	-0.584678	0.0298139
Glyma.06G086800	-0.649317	0.0186849	-0.734733	0.0495608
Glyma.06G092000	-1.3211	2.26e-17	-1.19461	8.45e-07
Glyma.06G102500	-0.600867	0.00279729	-1.03226	0.000204
Glyma.06G105300	-0.480909	0.0112939	-0.739967	0.000393
Glyma.06G105700	-0.667242	0.000424183	-0.840296	0.00100644
Glyma.06G106900	-0.362739	0.00868987	-0.632792	0.0010119
Glyma.06G143300	-0.690431	6.35e-06	-1.65605	7.19e-08
Glyma.06G152400	-1.19269	0.00109639	-1.69579	0.00595291
Glyma.06G157200	-0.594475	0.00538409	-1.37787	0.000161
Glyma.06G160200	-0.527909	0.00299891	-0.685321	0.00889355
Glyma.06G229900	-0.643365	0.00501072	-0.689698	0.0445407
Glyma.06G232300	-0.701938	5.06e-05	-0.783832	0.00211408
Glyma.06G244900	-0.485038	0.036961	-0.656177	0.010704
Glyma.06G289900	-0.519451	0.0164836	-0.554471	0.0300494
Glyma.06G295100	-0.651254	0.0336365	-1.42105	0.00511511
Glyma.06G307000	-0.974224	0.0309129	-2.01716	0.000393
Glyma.06G320800	-0.603637	1.35e-05	-0.689695	0.0111895
Glyma.06G322000	-0.463014	0.0254376	-1.09076	9.67e-05
Glyma.06G324300	-0.551282	0.0015955	-0.641358	0.00858238
Glyma.07G003400	-0.802809	0.000348369	-0.782692	0.000572
Glyma.07G004200	-0.416777	0.0198752	-1.66099	3.6e-09
Glyma.07G007000	-0.793873	3.82e-06	-0.598985	0.0102015
Glyma.07G009600	-0.524075	0.020037	-0.637525	0.0169537
Glyma.07G018000	-0.910972	3.63e-05	-0.970605	0.0184337
Glyma.07G022000	-0.455801	0.0280472	-1.41171	5.16e-08
Glyma.07G044400	-0.908402	0.000287059	-0.582336	0.00976731
Glyma.07G046500	-0.33626	0.0368292	-0.543242	0.0311489
Glyma.07G050100	-1.39703	0.000680689	-1.54334	0.0384433
Glyma.07G065600	-0.330602	0.0108503	-0.628697	0.000445
Glyma.07G079500	-0.367507	0.0240204	-0.94293	0.000727
Glyma.07G115000	-0.934699	9.05e-07	-1.29282	0.000247
Glyma.07G118600	-0.355559	0.0187831	-0.514904	0.0246251
Glyma.07G130800	-1.66937	1.26e-06	-2.77411	0.0111106
Glyma.07G133500	-0.72114	0.000563433	-0.886817	0.00124876
Glyma.07G134800	-0.565468	0.041387	-1.65601	0.000224
Glyma.07G140400	-0.508315	7.77e-05	-0.649035	0.00107483
Glyma.07G155200	-1.0312	0.0014284	-1.1015	4.41e-06
Glyma.07G190600	-0.464804	0.0194488	-0.624632	0.0092543
Glyma.07G202200	-0.605228	0.00436751	-1.81031	4.11e-15
Glyma.07G215000	-0.61565	0.0228246	-0.931844	0.0419296
Glyma.07G215900	-0.497601	0.000957084	-0.873716	0.000155
Glyma.07G226600	-0.996929	1.18e-09	-1.06533	0.000119
Glyma.07G229000	-0.422137	0.00530847	-1.28734	1.25e-07
Glyma.07G233700	-0.784099	0.0497996	-1.80169	0.0221858
Glyma.07G254600	-0.526493	0.0099215	-0.864478	2.65e-05
Glyma.07G256700	-1.6867	5.94e-07	-2.05657	0.0019206
Glyma.07G257300	-0.365505	0.0223411	-0.378557	0.021938
Glyma.07G260600	-0.662278	0.00677701	-0.746361	0.0428055
Glyma.07G261400	-0.485948	0.000564155	-0.779957	0.00316287
Glyma.07G261600	-0.412912	0.00230608	-0.625352	0.00449429
Glyma.07G263300	-0.355921	0.0202781	-1.01266	0.000303
Glyma.07G265500	-1.01406	4.75e-05	-2.33826	9.6e-12
Glyma.07G269900	-0.500377	0.000532376	-0.747077	5.52e-07
Glyma.08G000800	-0.363191	0.0186275	-1.07293	5.27e-06
Glyma.08G001200	-0.629683	0.0152257	-1.01898	0.000394
Glyma.08G005200	-0.422586	0.00479424	-0.968106	0.000439
Glyma.08G005900	-0.286767	0.00806589	-0.708574	9.31e-05
Glyma.08G016700	-0.703543	0.0405088	-0.9204	0.0386149
Glyma.08G017300	-0.529414	0.000181318	-0.653998	0.000976
Glyma.08G025700	-0.490141	0.00230166	-0.61626	0.0221356
Glyma.08G045100	-0.424706	0.0179017	-0.52404	0.0145285
Glyma.08G046400	-0.443056	0.0322567	-0.539503	0.0260057
Glyma.08G049000	-0.423366	0.000575218	-1.32617	1.35e-08
Glyma.08G050300	-1.75956	3.11e-13	-1.03199	0.038542
Glyma.08G053600	-0.639601	0.00210637	-0.923541	1.25e-05
Glyma.08G056100	-0.36705	0.0403204	-1.00659	8.63e-06
Glyma.08G067300	-0.729213	2.94e-06	-0.904588	0.00397111
Glyma.08G068200	-1.35719	4.56e-07	-3.20061	0.0151031
Glyma.08G084300	-0.427294	0.0375605	-0.615247	0.00382485
Glyma.08G086600	-0.557602	0.00100828	-0.351762	0.0409478
Glyma.08G090000	-0.351538	0.0485893	-0.922006	1.04e-07
Glyma.08G092200	-0.499443	0.00991647	-0.866485	0.000953
Glyma.08G105400	-1.71419	1.65e-12	-0.66197	0.00041
Glyma.08G108800	-0.261883	0.0383479	-0.628022	0.00314696
Glyma.08G108900	-0.378295	0.0149379	-0.525797	0.0307324
Glyma.08G113400	-0.850983	0.000182363	-0.868321	0.00115187
Glyma.08G127600	-1.40471	1.94e-22	-0.867886	0.000369
Glyma.08G139300	-0.541528	0.00806558	-0.952259	0.000837
Glyma.08G140900	-0.593747	0.0345265	-0.648491	0.0384433
Glyma.08G146200	-0.511154	0.0171927	-0.643398	0.0156351
Glyma.08G154900	-0.461175	0.0232446	-0.649956	0.00344459
Glyma.08G162100	-0.671584	0.000874823	-1.20092	0.000104
Glyma.08G169800	-0.380695	0.013694	-0.861859	2.3e-05
Glyma.08G174700	-1.7261	4.06e-06	-1.60432	0.00483691
Glyma.08G177100	-1.10762	9.02e-08	-1.31136	9.27e-05
Glyma.08G181000	-0.745512	1.54e-05	-0.963118	1.49e-05
Glyma.08G184400	-0.417034	0.0151182	-0.812669	0.000827
Glyma.08G202300	-0.653057	0.00092654	-0.738307	0.0236986
Glyma.08G222100	-0.385112	0.0154419	-0.546648	0.00802966
Glyma.08G222300	-0.379827	0.0138988	-1.15626	1.3e-05
Glyma.08G224000	-0.321471	0.0371005	-0.815899	0.00214968
Glyma.08G230000	-0.581898	0.00785215	-1.31489	0.00128672
Glyma.08G230500	-0.580307	0.000198995	-0.556479	0.0203393
Glyma.08G238100	-0.482874	0.00514949	-0.75085	0.0007
Glyma.08G243600	-0.458465	0.029522	-0.970728	0.00250057
Glyma.08G246300	-0.593001	6.01e-05	-1.08682	6.28e-05
Glyma.08G248700	-0.460867	0.0434745	-0.839459	0.00601602
Glyma.08G259200	-0.480307	0.00341541	-0.835363	0.00800499
Glyma.08G295500	-0.491871	0.0421066	-2.40266	1.88e-08
Glyma.08G300700	-0.321782	0.0102676	-0.514469	0.0118164
Glyma.08G311500	-0.596065	0.0373464	-1.07891	0.0042712
Glyma.08G312000	-1.0539	0.0209359	-0.689975	0.0096073
Glyma.08G323400	-0.651755	0.00137446	-0.874163	9.91e-05
Glyma.08G325400	-0.769393	0.00130114	-1.43933	1.53e-05
Glyma.08G339700	-0.483312	0.0377705	-1.0898	0.00300428
Glyma.08G344300	-0.449284	0.0029438	-0.586732	9.71e-07
Glyma.08G345900	-0.598656	0.00431894	-0.562715	0.017227
Glyma.08G348500	-0.423469	0.0428162	-0.96741	9.27e-07
Glyma.08G350800	-0.661737	0.000374407	-1.1364	1.89e-09
Glyma.08G360800	-0.845352	1.1e-05	-1.38844	8.49e-06
Glyma.09G001700	-0.372453	0.0276841	-1.78045	1.45e-07
Glyma.09G007900	-0.580494	0.0102132	-1.01706	6.91e-05
Glyma.09G010500	-0.489556	0.00288098	-0.940364	3.94e-06
Glyma.09G014400	-1.18746	0.00120876	-3.00952	0.000167
Glyma.09G015900	-0.60872	0.0394619	-0.879174	0.000618
Glyma.09G028400	-0.704621	0.00508021	-0.707521	0.00141174
Glyma.09G043400	-0.797063	2.45e-05	-1.26062	0.00211959
Glyma.09G047200	-0.404715	0.0284304	-1.39287	0.000235
Glyma.09G056400	-0.990025	0.00405184	-1.28753	0.0244882
Glyma.09G066500	-0.693722	2.95e-07	-1.09723	4.75e-07
Glyma.09G070000	-0.418047	0.000371215	-1.1163	4.48e-06
Glyma.09G073200	-0.574251	0.0100295	-1.04028	0.000196
Glyma.09G087400	-1.08241	2.57e-07	-0.86079	0.0168954
Glyma.09G091100	-0.59896	0.041551	-1.62955	5.34e-09
Glyma.09G092600	-0.552514	0.0125146	-0.849695	0.00011
Glyma.09G095200	-1.48374	7.31e-08	-2.10278	3.12e-06
Glyma.09G096700	-0.426816	0.0192917	-1.16278	1.93e-06
Glyma.09G144200	-0.797583	6.52e-05	-0.863752	0.00043
Glyma.09G167000	-0.529295	0.00485669	-1.31482	0.00520547
Glyma.09G179400	-0.511946	0.000186159	-0.705047	0.00729141
Glyma.09G196800	-0.462492	0.00548139	-0.998571	0.000273
Glyma.09G199000	-0.316059	0.0339374	-0.733839	0.00188331
Glyma.09G204800	-0.459503	0.0261665	-0.730586	0.0381494
Glyma.09G226700	-0.572411	0.00170299	-0.911332	0.000176
Glyma.09G234100	-0.363273	0.0317669	-0.471712	0.0150408
Glyma.09G246200	-0.496813	0.00477089	-0.941365	0.000567
Glyma.09G264900	-0.713456	0.00770435	-1.13956	0.00706646
Glyma.10G000400	-0.741339	4.3e-05	-0.498743	0.0470376
Glyma.10G000500	-0.565963	0.00504774	-0.942072	0.0325353
Glyma.10G006100	-0.44022	0.0249473	-0.979675	0.000862
Glyma.10G007800	-0.438668	0.000393838	-0.521651	0.000461
Glyma.10G010200	-0.39631	0.0424283	-0.558777	0.00789446
Glyma.10G016000	-0.661888	0.0220563	-1.01491	0.00369298
Glyma.10G021500	-0.399965	0.00693586	-0.520965	0.0144229
Glyma.10G023900	-0.362918	0.00787352	-0.489362	0.015972
Glyma.10G025300	-0.976172	0.0046418	-1.76833	0.00317671
Glyma.10G043700	-1.14952	0.00932271	-2.27325	0.0209059
Glyma.10G045100	-0.624564	0.00209881	-1.25412	0.00813895
Glyma.10G047100	-0.743807	0.000367445	-0.593735	0.0111101
Glyma.10G048600	-0.376326	0.0253757	-0.367412	0.0489711
Glyma.10G058000	-0.488663	0.0368438	-0.754463	0.00796183
Glyma.10G063200	-0.611414	0.0353199	-0.943067	0.0222925
Glyma.10G064500	-0.847517	9.21e-06	-0.802293	0.000731
Glyma.10G084200	-0.617451	0.0221968	-1.37737	0.000638
Glyma.10G090100	-0.798477	4.77e-06	-1.37595	2.37e-09
Glyma.10G092800	-2.29533	5.75e-50	-1.9332	0.000107
Glyma.10G102100	-0.685621	0.00112954	-1.06462	0.000127
Glyma.10G124800	-0.581689	0.00130245	-0.691089	0.0068566
Glyma.10G125000	-0.882141	1.07e-07	-1.51705	8.33e-06
Glyma.10G133800	-0.332631	0.00359854	-0.383217	0.0191889
Glyma.10G152000	-0.879948	7.24e-07	-0.983467	0.0113006
Glyma.10G158000	-0.432408	2.46e-05	-0.560384	0.0148924
Glyma.10G159600	-1.13825	1.43e-22	-1.20158	3.3e-10
Glyma.10G169800	-1.11624	0.00358684	-2.33039	0.00507839
Glyma.10G185000	-0.488266	0.00185704	-0.691276	0.00406743
Glyma.10G185500	-0.854884	9.13e-07	-1.09139	0.0117909
Glyma.10G193200	-0.685029	0.000157669	-0.508852	0.00790834
Glyma.10G194000	-0.775094	0.0305609	-1.88094	0.00341836
Glyma.10G215400	-0.363719	0.0282855	-0.636217	0.0113559
Glyma.10G223400	-0.405169	0.0175772	-0.443666	0.00411012
Glyma.10G235100	-0.419197	0.00516173	-0.60483	0.0124706
Glyma.10G236100	-0.31115	0.0456936	-0.68023	7.01e-06
Glyma.10G237600	-0.469628	0.0437391	-1.18098	0.00498733
Glyma.10G241000	-0.611606	0.0107418	-2.08367	4.08e-11
Glyma.10G270900	-0.575689	0.0369761	-1.2533	0.0183699
Glyma.11G000200	-0.464723	0.0248704	-0.824099	0.000916
Glyma.11G003600	-0.394329	0.0125547	-0.539405	0.00736676
Glyma.11G009200	-0.476079	0.00849279	-1.02837	9.61e-05
Glyma.11G017400	-0.454922	0.00790469	-0.751645	0.0046258
Glyma.11G019000	-0.586659	0.0369568	-2.50671	1.42e-07
Glyma.11G030300	-1.36918	0.000155583	-2.39263	0.000144
Glyma.11G031500	-0.410176	0.0225659	-0.478445	0.0134453
Glyma.11G034700	-0.37727	0.0126683	-0.351608	0.0297556
Glyma.11G035300	-0.898988	1.13e-07	-1.26391	2.37e-10
Glyma.11G051300	-0.715911	0.00878479	-1.503	6e-06
Glyma.11G053400	-0.457596	0.0200595	-0.720624	9.57e-07
Glyma.11G059200	-0.417401	0.000893187	-0.948056	0.000332
Glyma.11G063900	-0.628358	0.0345499	-0.831934	0.00410785
Glyma.11G065900	-0.641814	0.0125383	-0.911164	0.000195
Glyma.11G075100	-0.779223	0.00390875	-1.30364	0.00626246
Glyma.11G078400	-0.561518	0.00599687	-0.855781	0.022917
Glyma.11G086000	-0.363788	0.0342719	-0.594987	0.0407424
Glyma.11G088600	-0.545369	1.37e-06	-0.500456	0.00129348
Glyma.11G090200	-0.363156	0.013371	-0.698229	0.00382562
Glyma.11G101400	-0.395075	0.01265	-0.617905	0.0234294
Glyma.11G104300	-0.426021	0.0034977	-0.912628	0.000952
Glyma.11G113000	-0.397709	0.0228281	-0.91718	0.000292
Glyma.11G119000	-1.06514	1.08e-13	-2.95653	4.38e-05
Glyma.11G119100	-0.987979	6.14e-11	-2.36442	0.000856
Glyma.11G126000	-0.558912	0.0334689	-0.731915	0.0349833
Glyma.11G127200	-0.607721	2.45e-05	-0.833941	0.00398652
Glyma.11G131700	-0.693964	0.00211684	-0.848357	0.0160788
Glyma.11G141000	-0.603823	0.0390299	-1.69522	0.00568408
Glyma.11G141700	-0.62751	0.00985556	-0.794412	0.0493286
Glyma.11G141800	-0.504699	0.0275234	-0.583999	0.0393828
Glyma.11G143400	-0.279803	0.0227094	-0.355267	0.0288092
Glyma.11G155100	-0.429556	0.0405088	-2.15117	5.07e-07
Glyma.11G157000	-1.21058	2.3e-12	-1.4705	0.000153
Glyma.11G168800	-0.887599	0.0138703	-1.13075	0.0134232
Glyma.11G190200	-0.322486	0.0307315	-0.593825	0.00896569
Glyma.11G193200	-0.605313	0.000369568	-0.400146	0.0487757
Glyma.11G193600	-1.79888	1.18e-16	-2.13961	0.00131767
Glyma.11G199700	-0.589429	0.00575698	-0.749479	0.000661
Glyma.11G215200	-0.803956	0.000875784	-1.2693	1.59e-05
Glyma.11G223700	-0.436868	0.00136456	-0.777006	0.00272529
Glyma.11G238700	-0.938013	2.85e-06	-0.914874	0.000142
Glyma.11G248000	-0.414282	0.00169333	-0.722232	0.00181782
Glyma.11G250200	-1.86349	8.84e-08	-2.44557	0.03684
Glyma.11G254700	-0.706606	0.018112	-1.47909	0.000926
Glyma.12G021600	-0.420101	0.0095126	-0.774992	0.00328683
Glyma.12G029300	-0.748297	0.000198302	-0.979782	0.00919264
Glyma.12G062700	-1.05733	6.86e-08	-1.82344	2.44e-13
Glyma.12G066700	-0.261865	0.0321399	-0.418758	0.0131394
Glyma.12G080100	-0.728542	0.000606961	-1.37691	2.86e-07
Glyma.12G084000	-1.44581	6.34e-06	-1.02005	0.0037597
Glyma.12G111200	-0.773827	0.041067	-1.5992	0.0174548
Glyma.12G178200	-0.518663	0.0166997	-1.12637	5.48e-06
Glyma.12G180300	-0.512109	4.21e-06	-0.556171	0.0170726
Glyma.12G181900	-0.498124	0.0234843	-0.637216	0.0107514
Glyma.12G195600	-0.566832	0.0052243	-1.43458	0.0177327
Glyma.12G207600	-0.797449	0.00536535	-1.59741	0.000466
Glyma.12G208000	-0.632822	0.0293707	-1.07703	0.0100901
Glyma.12G210600	-1.60079	5.65e-10	-0.848308	9.15e-05
Glyma.12G213200	-0.907473	0.000141986	-1.0857	0.0401747
Glyma.12G221800	-0.794269	0.0158671	-1.07706	0.0140273
Glyma.12G222500	-0.465715	0.0417185	-0.605429	0.026138
Glyma.12G229200	-0.794451	0.000960445	-1.38783	0.000255
Glyma.12G233400	-0.943274	0.0341837	-2.10161	0.00824187
Glyma.12G234300	-0.433037	0.00512641	-0.479545	0.0219873
Glyma.13G045800	-0.392181	0.0334246	-0.541501	0.0172666
Glyma.13G047300	-0.692376	0.000250853	-0.734317	0.00720093
Glyma.13G049100	-0.436053	0.00563476	-1.13648	9.95e-05
Glyma.13G051000	-0.914173	0.039001	-1.32915	0.0122869
Glyma.13G057400	-0.695908	0.000546743	-0.789268	0.00668281
Glyma.13G057700	-0.432805	0.0123064	-0.797076	0.0432337
Glyma.13G058400	-0.278889	0.00817978	-0.804464	0.00234887
Glyma.13G070300	-0.976398	7.28e-09	-0.818232	0.0172769
Glyma.13G090700	-0.71664	0.00371994	-0.507222	0.00686318
Glyma.13G099500	-0.652619	0.0428227	-1.37119	0.00175821
Glyma.13G115800	-0.282135	0.0104586	-0.456786	0.0153227
Glyma.13G129700	-1.05048	0.000115967	-1.94057	0.00196204
Glyma.13G132700	-0.930034	0.00138826	-2.05858	0.00237541
Glyma.13G139000	-0.919366	1.74e-06	-1.45533	0.000247
Glyma.13G156800	-0.279397	0.0499202	-0.695091	0.0231333
Glyma.13G178700	-0.792118	0.000261931	-1.09936	6.58e-07
Glyma.13G191400	-1.15358	9.4e-11	-1.30865	1.29e-07
Glyma.13G196200	-0.882348	0.000441698	-1.48432	9.11e-05
Glyma.13G208700	-0.608361	0.000707239	-1.57416	4.81e-07
Glyma.13G210800	-0.561883	0.00376521	-0.66256	0.0108155
Glyma.13G212600	-0.853592	0.0161014	-1.9998	0.0184337
Glyma.13G220900	-0.704528	0.00027392	-1.63264	5.94e-06
Glyma.13G227000	-0.342518	0.0341829	-0.493725	0.0225734
Glyma.13G231400	-0.527903	0.0405585	-0.543677	0.0259271
Glyma.13G244900	-0.525789	0.00262145	-0.809033	0.0395113
Glyma.13G249700	-0.81688	0.000193601	-1.00938	0.00393328
Glyma.13G253500	-0.915825	0.000440627	-0.797495	0.00218985
Glyma.13G260100	-0.804381	0.0104258	-1.46729	0.0432337
Glyma.13G269100	-1.39552	6.69e-16	-2.0823	2.56e-08
Glyma.13G270400	-0.37813	0.0433487	-1.15739	0.00995257
Glyma.13G279500	-0.57158	0.0170166	-1.16637	0.000118
Glyma.13G293100	-0.719236	0.0109422	-0.826175	0.0480736
Glyma.13G306900	-0.456649	0.0151337	-1.25947	4.5e-05
Glyma.13G307000	-0.472313	0.0208427	-1.11597	0.000299
Glyma.13G311000	-0.386943	0.0454146	-1.04058	2.71e-05
Glyma.13G316400	-0.31091	0.032529	-0.473221	0.00690106
Glyma.13G318900	-0.459249	0.0305404	-1.05309	0.000111
Glyma.13G321700	-0.94753	1.18e-07	-0.906659	0.0250522
Glyma.13G322900	-0.720219	0.0208427	-1.98344	0.00714734
Glyma.13G327000	-0.740128	2.77e-05	-0.61065	0.0445014
Glyma.13G330600	-0.260101	0.038383	-0.474972	0.00282767
Glyma.13G347700	-0.993221	3.48e-09	-1.27643	4.05e-11
Glyma.13G361700	-1.67313	2.75e-14	-2.59683	4.5e-34
Glyma.13G367200	-0.45663	0.00785521	-0.586132	0.00429241
Glyma.13G369700	-0.408776	0.0113642	-0.482344	0.0267861
Glyma.14G003500	-0.458233	0.0309008	-1.19503	3.15e-05
Glyma.14G004200	-0.506522	0.018682	-1.42395	8.28e-06
Glyma.14G028900	-0.789036	0.00870814	-0.849402	9.27e-05
Glyma.14G031200	-1.29171	0.00010043	-0.993785	0.0285253
Glyma.14G043400	-0.304219	0.0169397	-0.334814	0.0367592
Glyma.14G045000	-1.49696	3.98e-05	-2.77171	0.00166564
Glyma.14G045300	-0.525574	0.0489081	-1.37184	0.00236652
Glyma.14G045900	-0.344258	0.00063984	-0.371842	0.0315441
Glyma.14G053600	-1.88989	6.08e-08	-3.09138	0.0001
Glyma.14G057700	-0.816655	0.0125258	-1.26071	0.0169219
Glyma.14G065900	-0.357385	0.0240409	-0.666671	0.00135062
Glyma.14G069200	-0.471947	0.0164478	-0.576971	0.0011479
Glyma.14G070600	-0.508347	0.0102534	-1.33206	7.46e-05
Glyma.14G084600	-1.15821	4.88e-05	-0.79037	0.0104217
Glyma.14G127800	-0.468023	0.0167802	-1.05146	0.000197
Glyma.14G130300	-0.519797	0.036596	-0.979188	0.00220827
Glyma.14G150100	-0.559864	0.00109472	-0.680022	0.0110726
Glyma.14G174400	-0.436204	0.0188861	-0.47278	0.0481418
Glyma.14G176400	-0.66662	0.00413452	-0.663546	0.0381997
Glyma.14G190100	-0.439583	0.000934261	-0.425578	0.0351374
Glyma.14G194900	-1.60335	1.06e-05	-1.51574	0.0328079
Glyma.14G201100	-0.762957	0.00260263	-1.10477	9.27e-05
Glyma.14G209900	-0.539651	0.0123814	-1.1531	0.00190449
Glyma.14G216200	-1.2414	9.16e-07	-1.96243	0.00442707
Glyma.15G003700	-0.397949	0.0341426	-0.614932	0.00312299
Glyma.15G003900	-0.779974	0.00109472	-0.949637	0.000532
Glyma.15G009500	-1.18097	1.8e-05	-2.76481	9.74e-08
Glyma.15G010300	-0.534579	0.0345031	-1.55263	5.29e-06
Glyma.15G015800	-0.640864	2.33e-06	-0.834863	0.000353
Glyma.15G019800	-0.851119	0.0227574	-1.49628	0.0347078
Glyma.15G026400	-1.14635	0.00125119	-1.11781	0.000634
Glyma.15G056500	-0.847083	0.044722	-1.27693	0.0383398
Glyma.15G061400	-1.55783	0.000142621	-1.45425	0.00970284
Glyma.15G066500	-0.678018	0.00284946	-1.2874	0.000526
Glyma.15G094700	-0.363193	0.0345181	-1.15419	0.000114
Glyma.15G098500	-0.624141	0.00426802	-0.830133	0.0181717
Glyma.15G099800	-0.279566	0.0113702	-0.577353	0.0231427
Glyma.15G102000	-1.02503	1.37e-07	-0.97654	8.35e-07
Glyma.15G109300	-0.670624	2.55e-06	-0.560317	0.00207232
Glyma.15G119100	-1.28306	0.000717143	-3.3703	0.000508
Glyma.15G122500	-0.671579	0.0258542	-1.23844	0.039268
Glyma.15G122900	-0.664644	1.75e-05	-1.12734	1.03e-05
Glyma.15G133900	-0.799897	0.00775281	-1.13103	0.015408
Glyma.15G148500	-0.533625	0.00235133	-1.09033	3.84e-07
Glyma.15G149200	-0.662454	0.000345975	-0.638249	0.0430403
Glyma.15G149700	-0.596205	0.00633748	-1.96762	5.27e-11
Glyma.15G154100	-1.00416	0.000288124	-0.986075	0.0239406
Glyma.15G155300	-0.650629	0.000544946	-1.15466	0.000629
Glyma.15G155400	-0.634476	0.0279859	-1.1413	0.00402313
Glyma.15G182000	-1.06322	0.00131089	-1.0143	0.0374576
Glyma.15G200600	-0.546432	2.57e-05	-1.68662	1.04e-06
Glyma.15G215600	-0.537396	0.0274524	-0.784759	0.00181836
Glyma.15G216700	-0.619196	0.0435006	-1.05047	0.0244387
Glyma.15G217100	-1.00869	2.88e-11	-0.77367	0.00032
Glyma.15G248400	-1.02774	0.0052224	-1.75924	0.0344896
Glyma.15G248900	-0.457315	0.00320886	-0.442155	0.00347439
Glyma.15G251800	-1.1785	3.59e-05	-1.05038	0.0445752
Glyma.15G254000	-1.04175	1.78e-09	-1.15943	7.7e-05
Glyma.15G267000	-0.524529	0.0408655	-1.23062	9.51e-05
Glyma.15G274200	-0.830403	0.000717828	-1.34985	0.000272
Glyma.15G276100	-0.53593	0.0483415	-1.31753	7.36e-05
Glyma.16G012700	-0.829005	0.00330167	-1.04762	0.00438449
Glyma.16G018000	-1.16006	0.00292181	-0.973542	0.0196648
Glyma.16G018300	-0.566583	0.000369568	-0.436568	0.0468669
Glyma.16G018500	-0.578506	0.0377205	-0.968828	0.00166944
Glyma.16G020100	-0.762466	2.81e-05	-0.848778	0.000341
Glyma.16G024000	-0.71281	1.89e-06	-1.38255	1.37e-05
Glyma.16G038300	-0.574943	1.64e-05	-0.758579	0.000729
Glyma.16G047100	-0.461428	0.0249295	-1.78878	2.95e-09
Glyma.16G047400	-0.3166	0.0453233	-0.583745	0.042455
Glyma.16G067700	-0.92946	3.82e-08	-1.18082	0.0086335
Glyma.16G087300	-0.656555	6.72e-09	-0.638863	0.000369
Glyma.16G094100	-0.688105	0.00939485	-1.26923	0.00232227
Glyma.16G125100	-0.748804	0.000276237	-0.837357	0.00588459
Glyma.16G128800	-0.517793	0.0150566	-0.758928	0.00733611
Glyma.16G142100	-1.41735	9.85e-16	-1.39774	2.54e-09
Glyma.16G153600	-0.364505	0.0467384	-1.35598	5.62e-06
Glyma.16G158100	-0.412687	0.00534388	-1.13718	6.55e-13
Glyma.16G181900	-0.651862	0.0321113	-0.897615	0.0442898
Glyma.16G194400	-0.482988	0.0462433	-0.922155	0.0186991
Glyma.16G207400	-0.411561	0.0238229	-0.521531	0.021155
Glyma.16G211700	-0.663665	0.00476395	-0.71006	0.00847753
Glyma.16G218500	-0.97135	3.12e-05	-0.457941	0.0436494
Glyma.16G219500	-1.97713	1.01e-35	-1.50445	3.15e-09
Glyma.17G013400	-0.66998	0.00295167	-1.0755	0.0167351
Glyma.17G017400	-0.528943	0.00932754	-2.26305	3.42e-12
Glyma.17G032300	-0.419026	0.0367943	-0.520784	0.0234047
Glyma.17G038700	-0.678602	0.0164243	-0.920994	0.00758544
Glyma.17G041300	-0.600133	3.29e-05	-1.25109	6.28e-10
Glyma.17G061400	-0.440148	0.0420623	-0.431402	0.0425792
Glyma.17G062500	-0.648539	4.86e-05	-0.696605	0.000135
Glyma.17G063200	-0.486203	0.0456586	-0.526821	0.0368524
Glyma.17G076500	-0.44542	0.0339374	-0.431389	0.0371406
Glyma.17G096100	-0.349868	0.0253499	-0.638721	0.00825423
Glyma.17G098200	-0.470966	0.00747971	-1.24507	7.5e-06
Glyma.17G126300	-1.93507	5.42e-09	-2.03042	0.00736664
Glyma.17G126500	-0.546149	0.0424768	-0.762379	0.000176
Glyma.17G134100	-0.403475	0.0324295	-0.88946	0.00152269
Glyma.17G139800	-0.682172	0.00531846	-2.1946	0.00106814
Glyma.17G139900	-1.57481	2.16e-19	-2.14017	0.00448681
Glyma.17G148400	-0.475083	0.0154671	-0.721721	0.00843847
Glyma.17G149800	-0.494488	0.00348435	-0.814232	0.000288
Glyma.17G152800	-1.21225	3.51e-05	-0.95922	0.0260951
Glyma.17G164100	-0.417855	0.00270983	-0.443502	0.00708581
Glyma.17G172900	-0.466366	0.0159895	-1.04406	3.45e-07
Glyma.17G217200	-0.675368	0.0377476	-1.634	0.000488
Glyma.17G245000	-0.348786	0.046537	-0.468201	0.00541311
Glyma.17G257700	-0.629815	0.0282167	-0.99116	0.0302003
Glyma.17G257800	-0.51113	0.0361194	-1.02225	0.00298507
Glyma.18G002500	-0.723117	0.0150566	-1.22895	0.00254019
Glyma.18G003100	-0.721026	0.000598857	-1.79928	2.1e-16
Glyma.18G003200	-0.935658	6.35e-06	-1.0449	0.00145848
Glyma.18G019600	-0.415326	0.0207071	-0.9076	0.000222
Glyma.18G034400	-0.462198	0.00729	-0.534143	0.0349686
Glyma.18G055400	-1.75234	2.55e-09	-1.55565	0.00188279
Glyma.18G055500	-1.90041	3.1e-08	-2.49312	0.00209941
Glyma.18G060200	-1.68295	1.23e-05	-1.56386	0.00935244
Glyma.18G062500	-0.862982	0.000372261	-1.78675	1.99e-08
Glyma.18G066100	-0.560355	1.09e-05	-0.774861	9.99e-05
Glyma.18G080200	-1.66998	7.5e-27	-1.29435	0.000759
Glyma.18G083200	-0.639918	7.08e-08	-0.474955	0.00612293
Glyma.18G084000	-0.729959	1.34e-06	-0.980669	0.00469145
Glyma.18G103400	-0.652665	7.15e-05	-1.27974	1.48e-06
Glyma.18G103500	-0.72042	9.83e-09	-0.822753	0.000914
Glyma.18G106300	-0.727517	0.000657003	-0.906433	0.00551909
Glyma.18G106800	-0.285242	0.0296266	-0.502207	0.0150479
Glyma.18G130800	-0.766039	0.0111446	-1.19454	0.000884
Glyma.18G152400	-0.39493	0.00767381	-0.514097	0.0269995
Glyma.18G156900	-0.385026	0.00674396	-0.652919	0.00414199
Glyma.18G182800	-0.851874	0.00580097	-2.38839	2.4e-09
Glyma.18G215600	-0.717639	0.0211522	-1.04897	0.0302485
Glyma.18G216200	-0.929483	0.0234982	-1.47839	0.0315719
Glyma.18G217500	-0.367009	0.0107492	-0.683377	0.0102274
Glyma.18G222200	-0.549035	0.0191091	-1.11328	9.17e-05
Glyma.18G232800	-0.923481	0.0123307	-0.930771	0.0464747
Glyma.18G246800	-0.70166	0.000892993	-0.732761	0.0221858
Glyma.18G255700	-0.364839	0.0290478	-0.483911	0.0285199
Glyma.18G258000	-0.632983	0.00102641	-1.14951	1.23e-08
Glyma.18G261900	-1.10665	0.000226747	-2.23068	6.9e-06
Glyma.18G281000	-1.22986	7.87e-05	-1.50402	6.23e-05
Glyma.18G284400	-0.979265	0.00822302	-1.20089	0.0383608
Glyma.18G286400	-0.552709	0.00498317	-0.694011	0.00301344
Glyma.18G289100	-0.468808	0.00223215	-0.691578	0.0130694
Glyma.18G292400	-0.664731	0.000298611	-1.68872	2.84e-06
Glyma.18G300800	-0.547721	0.000979519	-1.47628	3.54e-07
Glyma.19G016600	-1.33841	8.48e-07	-1.33417	0.0466881
Glyma.19G028400	-0.54725	5.79e-05	-0.499316	0.00247159
Glyma.19G038400	-0.398828	0.00272994	-0.476949	0.023363
Glyma.19G041400	-0.716395	0.029736	-1.6391	0.0092465
Glyma.19G044900	-0.457658	0.0343022	-1.04071	0.00607134
Glyma.19G052400	-0.292577	0.0415239	-0.390942	0.0419485
Glyma.19G055800	-1.09581	0.0125146	-2.80224	0.00120154
Glyma.19G062600	-0.78565	0.00161265	-2.25497	0.0249896
Glyma.19G062800	-0.681379	1.83e-08	-1.5435	2.56e-06
Glyma.19G106700	-0.657525	0.00764874	-2.32532	2.89e-07
Glyma.19G113500	-0.400556	0.0286982	-0.902175	0.00148389
Glyma.19G120000	-1.15669	1.74e-06	-1.44083	0.0399494
Glyma.19G124600	-0.906152	0.0132424	-1.84735	0.00128956
Glyma.19G125800	-0.614936	6.49e-05	-0.841223	8.44e-08
Glyma.19G127700	-0.560521	0.00877529	-1.29759	3.15e-06
Glyma.19G132300	-0.284838	0.0477774	-1.13115	2.36e-07
Glyma.19G133300	-1.27203	1.26e-06	-2.22255	1.2e-05
Glyma.19G143300	-0.704492	0.000579635	-1.28564	0.000154
Glyma.19G147900	-0.41484	0.00619345	-0.49344	0.0211304
Glyma.19G151800	-0.70518	0.00525909	-0.787365	0.0168096
Glyma.19G156200	-0.651554	0.0125454	-1.77045	4.99e-12
Glyma.19G159600	-0.953808	0.0239434	-2.94226	0.0101709
Glyma.19G167200	-0.614758	0.0321113	-0.84974	0.00425941
Glyma.19G170700	-0.552134	0.0258198	-1.02268	0.000493
Glyma.19G178100	-0.449641	0.0134324	-0.884852	0.000583
Glyma.19G178200	-0.500463	0.0042848	-1.16666	0.00019
Glyma.19G178800	-0.358437	0.0406474	-0.436313	0.0428055
Glyma.19G187000	-0.531731	0.00563592	-1.83953	2.1e-11
Glyma.19G192900	-1.26218	0.000593459	-0.98389	0.0217831
Glyma.19G201600	-0.43014	0.0355984	-0.851859	0.000839
Glyma.19G212600	-1.14732	1.94e-06	-1.71142	3.96e-08
Glyma.19G215500	-0.52004	0.00649734	-1.83507	6e-10
Glyma.19G222400	-0.638494	0.000473722	-0.850668	0.00366569
Glyma.19G222600	-0.500477	0.0431542	-0.559953	0.00645068
Glyma.19G228400	-0.678484	0.00311337	-1.06621	0.000585
Glyma.19G231300	-0.743887	0.00104903	-1.37819	0.00350909
Glyma.19G258400	-0.512398	0.00244995	-0.800969	0.0162264
Glyma.19G261700	-0.335995	0.0374288	-0.997736	6.08e-07
Glyma.20G012100	-0.393941	0.0245641	-0.454054	0.0240469
Glyma.20G054000	-1.40625	2.48e-05	-1.71237	6.93e-14
Glyma.20G062700	-0.402548	0.00619345	-1.48364	3.29e-10
Glyma.20G067300	-0.715618	0.000661093	-1.49084	5.56e-07
Glyma.20G077300	-0.796464	0.000413909	-1.81516	0.000683
Glyma.20G083300	-0.296061	0.0290781	-0.386703	0.0405341
Glyma.20G106500	-0.297962	0.00183426	-0.414861	0.0147275
Glyma.20G115900	-0.682824	0.0407251	-1.48586	2.54e-05
Glyma.20G116100	-0.527061	0.000149201	-0.555838	0.0306293
Glyma.20G132200	-0.562611	0.0485281	-0.815714	0.0466651
Glyma.20G142000	-0.98602	0.00420752	-1.83039	0.00369611
Glyma.20G144600	-0.566767	3.01e-05	-0.473682	0.0221858
Glyma.20G162000	-0.812011	0.00494661	-1.028	0.000694
Glyma.20G164500	-0.377671	0.0247293	-0.473569	0.0430138
Glyma.20G193500	-0.603638	0.00344918	-0.869557	0.00286422
Glyma.20G210700	-0.473619	0.000623647	-0.562643	0.0024965
Glyma.U038500	-0.397952	0.0347546	-0.615893	0.00761106
1Adjusted P-value at 0.05 with Benjamini Hochberg procedure.
