# Supplementary material for: RNA-Seq Dissects Incomplete Activation of Phytoalexin Biosynthesis by the Soybean Transcription Factors GmMYB29A2 and GmNAC42-1
Source: Plants (Basel). 2023 Jan 25;12(3):545. doi: 10.3390/plants12030545 (PMC9921300; doi:10.3390/plants12030545)
Supplement: Supplementary file 1 [file plants-12-00545-s001.zip › Supplemental Table S5. Genes commonly downregulated by WGE and p35S-GmNAC42-1_.xlsx]

## Sheet: Sheet1
Supplemental Table S5. Genes commonly downregulated by WGE and p35S::GmNAC42-1.
Wm82.a2 (Glyma 2.0)	WGEvsH2O, empty vector log2FoldChange	WGEvsH2O, empty vector adjusted P-value1	p35S::GmNAC42-1 vsVector, H2O log2FoldChange	p35S::GmNAC42-1 vsVector, adjusted P-value1
Glyma.01G001500	-0.839447	8.24e-07	-1.5461	0.0274764
Glyma.01G023000	-0.645867	3.6e-06	-0.541081	0.019259
Glyma.01G024000	-0.603169	0.000720327	-1.01431	4.06e-06
Glyma.01G041200	-1.22766	6.21e-05	-1.59663	0.0207511
Glyma.01G050100	-1.5048	4.34e-14	-1.14122	0.00395619
Glyma.01G081600	-1.00871	4.06e-06	-0.895719	0.0427207
Glyma.01G090200	-0.843417	0.00052727	-1.06619	0.0156073
Glyma.01G120000	-1.9544	1.01e-06	-2.69242	0.0150806
Glyma.01G129400	-0.479623	0.0127462	-0.706244	0.00737434
Glyma.01G156200	-0.444124	0.00120307	-0.742237	0.000507
Glyma.01G186600	-0.459313	0.0185531	-0.997733	5.54e-05
Glyma.02G003700	-0.933278	0.000298611	-1.27429	0.000207
Glyma.02G034400	-1.02644	0.00842714	-1.63401	0.000139
Glyma.02G040700	-0.848747	2.02e-07	-1.05293	0.00882722
Glyma.02G064100	-3.59732	1.26e-52	-1.53131	0.00236489
Glyma.02G086100	-0.451685	0.00671033	-0.548763	0.047466
Glyma.02G109100	-1.53375	3.62e-10	-1.13639	8.22e-06
Glyma.02G125900	-1.12602	1.3e-05	-1.13275	0.000961
Glyma.02G159900	-0.979202	0.0246124	-1.34828	0.013485
Glyma.02G169800	-1.22298	1.22e-07	-0.894072	0.0324859
Glyma.02G177800	-3.09413	2.34e-24	-2.23917	0.000267
Glyma.02G207800	-0.532253	0.0171927	-0.803758	0.025387
Glyma.02G270200	-0.617724	0.000897922	-0.429345	0.0315433
Glyma.02G304500	-0.570658	4.82e-05	-0.593264	0.011122
Glyma.03G001600	-1.31852	0.00163204	-2.1068	0.0298701
Glyma.03G005600	-0.801591	0.0432528	-0.826302	0.0124789
Glyma.03G040600	-0.70142	0.00083931	-0.867823	1.53e-05
Glyma.03G044300	-0.922656	0.000576321	-1.50845	0.0207574
Glyma.03G061200	-0.812214	0.0141564	-1.09337	0.0239601
Glyma.03G061300	-0.941925	0.0381325	-1.39019	9.01e-12
Glyma.03G078600	-0.579679	0.0254381	-1.07136	0.00851931
Glyma.03G105700	-0.670595	0.00762081	-0.785602	0.0203025
Glyma.03G223600	-3.30562	3.56e-53	-1.80504	1.9e-09
Glyma.03G234800	-1.08378	0.000424977	-1.55298	0.0281937
Glyma.03G253200	-0.419178	0.0123893	-0.90242	0.000499
Glyma.04G017700	-0.630639	0.0013401	-0.593994	0.0420255
Glyma.04G022300	-1.87225	1.46e-17	-1.00807	0.0118659
Glyma.04G027400	-2.31732	7.28e-10	-1.51424	0.00564462
Glyma.04G029100	-0.541509	0.00020704	-0.746184	0.0245044
Glyma.04G036800	-0.72922	0.0045816	-1.18803	0.0124902
Glyma.04G042000	-0.37714	0.0441858	-0.618781	0.0394482
Glyma.04G047900	-0.518312	0.0292477	-1.30504	1.04e-05
Glyma.04G150900	-0.742065	0.00769247	-1.26092	0.00304658
Glyma.04G188700	-1.24316	7.29e-05	-1.83191	0.00399149
Glyma.04G204400	-0.80886	7.98e-05	-0.790937	0.00897484
Glyma.04G222100	-0.940021	1.6e-06	-1.27088	0.0015503
Glyma.04G223300	-1.72902	4.42e-15	-1.50654	3.59e-05
Glyma.04G249700	-1.05211	0.00261151	-1.4626	0.000122
Glyma.05G102100	-0.634821	0.00761064	-0.760063	0.033209
Glyma.05G128500	-0.916514	0.000505124	-1.36972	1.36e-05
Glyma.05G139300	-0.62013	0.000198772	-1.12757	0.00750596
Glyma.05G154600	-1.49058	4.18e-07	-1.29432	0.0150023
Glyma.05G216400	-0.638292	0.000279512	-0.786178	0.0240851
Glyma.06G023900	-0.61586	0.00235113	-0.754013	0.0377227
Glyma.06G030500	-0.76587	0.0326387	-1.43525	0.0312257
Glyma.06G034700	-0.960211	0.0171101	-1.82929	0.013024
Glyma.06G049200	-0.940727	0.00473475	-1.14277	0.0117468
Glyma.06G092000	-1.3211	2.26e-17	-0.940234	0.00411543
Glyma.06G102700	-0.263122	0.0251356	-0.513233	0.0361267
Glyma.06G105300	-0.480909	0.0112939	-0.571256	0.0440643
Glyma.06G159900	-0.585229	0.0238712	-0.89952	0.0348277
Glyma.06G187300	-1.75137	4.15e-07	-1.73098	0.00148474
Glyma.06G239900	-1.04266	0.00544152	-2.46641	0.000215
Glyma.06G287000	-1.53701	6.66e-17	-0.888249	0.00827996
Glyma.06G310100	-0.988843	0.00488403	-2.32991	2.54e-07
Glyma.07G003400	-0.802809	0.000348369	-0.677941	0.0344649
Glyma.07G027400	-0.924936	4.86e-06	-1.05582	0.0215604
Glyma.07G055300	-0.334989	0.0407986	-0.686342	0.00992186
Glyma.07G072300	-0.714077	0.029672	-1.33164	0.000434
Glyma.07G222200	-0.473237	0.00911169	-0.94156	0.00162134
Glyma.07G260300	-1.1574	4.8e-15	-0.630797	0.0408498
Glyma.07G262000	-0.528777	0.00576975	-0.794593	0.00163724
Glyma.07G262100	-0.47257	0.0139694	-0.664173	0.0405556
Glyma.07G265500	-1.01406	4.75e-05	-1.29813	0.000915
Glyma.08G002700	-0.921439	0.000240109	-1.02519	0.00639272
Glyma.08G004700	-0.381186	0.0363987	-0.59059	0.0431709
Glyma.08G012600	-0.525111	0.0495342	-1.18869	0.00375187
Glyma.08G017300	-0.529414	0.000181318	-0.685278	0.00354768
Glyma.08G039200	-0.864968	6.55e-09	-0.843754	5.73e-05
Glyma.08G044300	-0.903191	0.015226	-1.69261	0.000636
Glyma.08G053600	-0.639601	0.00210637	-0.7495	0.00906545
Glyma.08G055000	-0.365148	0.000867015	-0.446642	0.0280428
Glyma.08G070300	-0.992655	3.02e-09	-0.85043	0.000463
Glyma.08G082200	-0.571687	0.0261008	-0.807907	0.0172549
Glyma.08G113400	-0.850983	0.000182363	-0.754634	0.0290807
Glyma.08G127600	-1.40471	1.94e-22	-0.981338	0.0016662
Glyma.08G181000	-0.745512	1.54e-05	-0.623835	0.0287746
Glyma.08G193500	-0.476203	0.0116666	-0.794145	0.00704298
Glyma.08G223300	-0.763732	3.6e-05	-0.694268	0.0253381
Glyma.08G328000	-2.59933	1.56e-55	-1.90312	1.81e-10
Glyma.08G360800	-0.845352	1.1e-05	-1.01062	0.00312365
Glyma.09G028000	-0.891505	0.00467755	-1.70723	0.00484036
Glyma.09G148400	-0.917381	4.51e-06	-0.876774	0.0198862
Glyma.09G181400	-0.774853	1.56e-05	-0.953456	1.98e-05
Glyma.09G236800	-1.03236	0.000617189	-0.989371	0.0124701
Glyma.09G249500	-1.53495	9.93e-06	-1.44063	0.0261169
Glyma.09G274000	-0.985856	0.000277466	-1.9164	6.71e-09
Glyma.10G000300	-0.724207	0.00382811	-0.755039	0.000394
Glyma.10G051500	-1.00809	4.63e-09	-1.01793	0.0129834
Glyma.10G102100	-0.685621	0.00112954	-1.16832	0.000279
Glyma.10G112000	-1.86131	5.76e-21	-1.109	7.55e-05
Glyma.10G159600	-1.13825	1.43e-22	-0.623637	0.0108468
Glyma.10G253200	-1.0917	0.00428562	-3.63729	4.99e-05
Glyma.10G262700	-0.738832	0.00276371	-1.20933	0.00343241
Glyma.10G266500	-1.66091	1.33e-08	-2.24098	0.000394
Glyma.11G063900	-0.628358	0.0345499	-0.821058	0.0131424
Glyma.11G131700	-0.693964	0.00211684	-1.10862	0.0491549
Glyma.11G164700	-2.14688	1.62e-16	-2.17243	9.09e-06
Glyma.11G193200	-0.605313	0.000369568	-0.934714	1.43e-05
Glyma.11G219200	-0.471992	0.00767972	-0.558749	0.0165533
Glyma.11G221000	-1.83879	2.87e-06	-3.55781	0.00423353
Glyma.11G229500	-0.772734	0.0171194	-1.37094	0.0345433
Glyma.11G250200	-1.86349	8.84e-08	-2.21916	0.000717
Glyma.12G080800	-0.950654	1.43e-08	-1.04626	0.00304862
Glyma.12G143200	-0.748154	0.0161421	-1.43732	0.00840142
Glyma.12G178200	-0.518663	0.0166997	-0.945398	0.00204009
Glyma.12G200100	-0.459273	0.0328004	-1.04684	0.00162134
Glyma.12G205400	-0.327883	0.0112843	-0.602288	0.00101578
Glyma.12G210600	-1.60079	5.65e-10	-0.985907	0.00304658
Glyma.12G210800	-0.797776	0.0042362	-0.88874	0.0216246
Glyma.12G217400	-2.0506	7.92e-41	-0.958099	0.0438603
Glyma.12G224000	-1.07535	0.00645011	-2.0079	0.00624751
Glyma.13G029200	-1.14308	0.0105857	-3.09333	0.000637
Glyma.13G042500	-0.998434	3.92e-06	-0.955356	0.00608493
Glyma.13G090600	-0.688806	0.00155671	-1.1846	0.00183539
Glyma.13G152900	-0.983533	0.000716256	-2.32705	9.81e-08
Glyma.13G208700	-0.608361	0.000707239	-1.03087	0.00619003
Glyma.13G229700	-0.949833	2.17e-05	-0.817633	0.00249555
Glyma.13G249700	-0.81688	0.000193601	-1.07864	0.00953616
Glyma.13G253500	-0.915825	0.000440627	-0.988447	0.00204339
Glyma.13G261700	-0.761627	0.000391705	-0.990552	0.00272557
Glyma.13G295500	-0.331936	0.0169185	-0.561556	0.00614054
Glyma.13G315200	-0.671994	0.0176509	-0.866966	0.0228683
Glyma.13G361700	-1.67313	2.75e-14	-0.951029	0.000248
Glyma.14G056500	-0.603335	0.00311529	-0.622629	0.0406421
Glyma.14G084600	-1.15821	4.88e-05	-1.17159	0.00261912
Glyma.14G087500	-0.788786	0.00285061	-0.742766	0.0363334
Glyma.14G093100	-0.938194	0.014941	-0.883326	0.0101262
Glyma.14G103100	-1.55128	0.000145559	-4.41653	0.0010062
Glyma.14G174200	-0.736685	0.000256582	-0.862424	0.00280258
Glyma.14G215400	-0.434586	0.0129575	-0.627404	0.0173647
Glyma.15G003900	-0.779974	0.00109472	-1.03232	0.000501
Glyma.15G026400	-1.14635	0.00125119	-1.22216	0.00940799
Glyma.15G061400	-1.55783	0.000142621	-1.90246	0.00916772
Glyma.15G105500	-0.728749	0.0235757	-1.09849	0.0170404
Glyma.15G139600	-0.633821	0.000478283	-0.850394	0.0433537
Glyma.15G160300	-0.919692	8.05e-06	-0.776423	0.00304658
Glyma.15G160600	-1.04861	0.00502861	-2.01815	0.00747997
Glyma.15G202200	-0.604285	7.96e-05	-0.871315	0.000223
Glyma.16G128900	-1.08146	0.00284946	-2.20396	0.0311058
Glyma.16G137000	-1.48987	6.52e-11	-1.01568	0.0494862
Glyma.16G169700	-0.68937	0.000607424	-0.891946	0.00661102
Glyma.16G219500	-1.97713	1.01e-35	-1.51206	6.4e-07
Glyma.17G018200	-0.542478	0.0120449	-0.538883	0.0216246
Glyma.17G059100	-0.613894	0.0243329	-0.993252	0.0281713
Glyma.17G088900	-0.569723	0.00169067	-0.791781	0.00279377
Glyma.17G101500	-0.652013	0.00173168	-0.843657	0.00183571
Glyma.17G110300	-0.581151	0.000663883	-0.677644	0.0177992
Glyma.17G126500	-0.546149	0.0424768	-0.867876	0.00139412
Glyma.17G139900	-1.57481	2.16e-19	-2.04442	0.0208481
Glyma.17G172900	-0.466366	0.0159895	-0.584706	0.0430803
Glyma.17G175400	-0.94171	0.00581741	-1.23152	0.0126652
Glyma.17G222300	-1.88279	1.88e-06	-4.15681	5.9e-06
Glyma.17G227500	-0.955421	0.00154804	-1.15322	0.0168082
Glyma.18G036000	-1.17898	0.000151853	-1.04073	0.0289673
Glyma.18G046300	-0.748958	0.00545834	-2.76455	0.00102555
Glyma.18G056400	-2.51378	1.39e-11	-2.14836	0.0384388
Glyma.18G078600	-1.8011	3.61e-30	-1.45499	0.00223123
Glyma.18G104000	-0.524909	0.00103697	-0.698625	0.0171643
Glyma.18G213200	-1.27285	3.27e-05	-2.12221	2.01e-05
Glyma.18G247000	-0.783292	0.00330742	-1.0108	0.00466549
Glyma.18G258000	-0.632983	0.00102641	-0.651818	0.00266237
Glyma.18G287800	-0.967962	9.02e-08	-1.21686	1.88e-05
Glyma.19G006200	-0.736379	0.00473987	-1.3497	0.000119
Glyma.19G037900	-0.849769	0.00599813	-2.51933	0.00604027
Glyma.19G115000	-0.923169	0.0255873	-1.45839	0.0159633
Glyma.19G125800	-0.614936	6.49e-05	-0.598398	0.01745
Glyma.19G126700	-1.13623	0.00918425	-2.76213	0.0205957
Glyma.19G222600	-0.500477	0.0431542	-0.75231	0.00292397
Glyma.19G228400	-0.678484	0.00311337	-1.00465	0.0265384
Glyma.20G142000	-0.98602	0.00420752	-2.08959	0.00909685
Glyma.20G196900	-2.06686	4.6e-27	-1.30349	7.7e-13
Glyma.20G213500	-0.999349	0.027926	-2.35623	0.0190912
Glyma.20G217400	-0.919127	0.00983953	-1.58028	0.0379712
Glyma.20G226300	-0.389656	0.0165277	-0.528782	0.01828
Glyma.20G227900	-0.384072	0.0296582	-0.863022	0.0375144
1Adjusted P-value at 0.05 with Benjamini Hochberg procedure.
