# Supplementary material for: RNA-Seq Dissects Incomplete Activation of Phytoalexin Biosynthesis by the Soybean Transcription Factors GmMYB29A2 and GmNAC42-1
Source: Plants (Basel). 2023 Jan 25;12(3):545. doi: 10.3390/plants12030545 (PMC9921300; doi:10.3390/plants12030545)
Supplement: Supplementary file 1 [file plants-12-00545-s001.zip › Supplemental Table S6. Genes commonly downregulated by WGE, p35S-GmMYB29A2 and p35S-GmNAC42-1_.xlsx]

## Sheet: Sheet1
Supplemental Table S6. Genes commonly downregulated by WGE, p35S::GmMYB29A2 and p35S::GmNAC42-1.
Wm82.a2 (Glyma 2.0)	WGEvsH2O, empty vector log2FoldChange	WGEvsH2O, empty vector adjusted P-value1	p35S::GmMYB29A2 vsVector, H2O log2FoldChange	p35S::GmMYB29A2 vsVector, H2O adjusted P-value1	p35S::GmNAC42-1 vsVector, H2O log2FoldChange	p35S::GmNAC42-1 vsVector, adjusted P-value1
Glyma.01G001500	-0.839447	8.24e-07	-2.4258	7.21e-06	-1.5461	0.0274764
Glyma.01G041200	-1.22766	6.21e-05	-1.38098	0.00409266	-1.59663	0.0207511
Glyma.01G050100	-1.5048	4.34e-14	-1.97395	2.54e-10	-1.14122	0.00395619
Glyma.01G081600	-1.00871	4.06e-06	-1.99048	2.08e-09	-0.895719	0.0427207
Glyma.01G156200	-0.444124	0.00120307	-0.511374	8.15e-05	-0.742237	0.000507
Glyma.01G186600	-0.459313	0.0185531	-0.324682	0.0473401	-0.997733	5.54e-05
Glyma.03G005600	-0.801591	0.0432528	-0.746557	0.000882	-0.826302	0.0124789
Glyma.03G105700	-0.670595	0.00762081	-0.831643	0.0015474	-0.785602	0.0203025
Glyma.04G027400	-2.31732	7.28e-10	-1.53372	0.000785	-1.51424	0.00564462
Glyma.04G042000	-0.37714	0.0441858	-0.809322	0.000852	-0.618781	0.0394482
Glyma.04G047900	-0.518312	0.0292477	-0.936293	0.00129294	-1.30504	1.04e-05
Glyma.04G150900	-0.742065	0.00769247	-2.07426	4.37e-08	-1.26092	0.00304658
Glyma.04G222100	-0.940021	1.6e-06	-1.70579	3.15e-06	-1.27088	0.0015503
Glyma.04G249700	-1.05211	0.00261151	-0.906055	0.00104396	-1.4626	0.000122
Glyma.05G102100	-0.634821	0.00761064	-1.40258	6.39e-08	-0.760063	0.033209
Glyma.05G216400	-0.638292	0.000279512	-0.609056	0.0350463	-0.786178	0.0240851
Glyma.06G023900	-0.61586	0.00235113	-0.789704	0.00109232	-0.754013	0.0377227
Glyma.06G092000	-1.3211	2.26e-17	-1.19461	8.45e-07	-0.940234	0.00411543
Glyma.06G105300	-0.480909	0.0112939	-0.739967	0.000393	-0.571256	0.0440643
Glyma.07G003400	-0.802809	0.000348369	-0.782692	0.000572	-0.677941	0.0344649
Glyma.07G265500	-1.01406	4.75e-05	-2.33826	9.6e-12	-1.29813	0.000915
Glyma.08G017300	-0.529414	0.000181318	-0.653998	0.000976	-0.685278	0.00354768
Glyma.08G053600	-0.639601	0.00210637	-0.923541	1.25e-05	-0.7495	0.00906545
Glyma.08G113400	-0.850983	0.000182363	-0.868321	0.00115187	-0.754634	0.0290807
Glyma.08G127600	-1.40471	1.94e-22	-0.867886	0.000369	-0.981338	0.0016662
Glyma.08G181000	-0.745512	1.54e-05	-0.963118	1.49e-05	-0.623835	0.0287746
Glyma.08G360800	-0.845352	1.1e-05	-1.38844	8.49e-06	-1.01062	0.00312365
Glyma.10G102100	-0.685621	0.00112954	-1.06462	0.000127	-1.16832	0.000279
Glyma.10G159600	-1.13825	1.43e-22	-1.20158	3.3e-10	-0.623637	0.0108468
Glyma.11G063900	-0.628358	0.0345499	-0.831934	0.00410785	-0.821058	0.0131424
Glyma.11G131700	-0.693964	0.00211684	-0.848357	0.0160788	-1.10862	0.0491549
Glyma.11G193200	-0.605313	0.000369568	-0.400146	0.0487757	-0.934714	1.43e-05
Glyma.11G250200	-1.86349	8.84e-08	-2.44557	0.03684	-2.21916	0.000717
Glyma.12G178200	-0.518663	0.0166997	-1.12637	5.48e-06	-0.945398	0.00204009
Glyma.12G210600	-1.60079	5.65e-10	-0.848308	9.15e-05	-0.985907	0.00304658
Glyma.13G208700	-0.608361	0.000707239	-1.57416	4.81e-07	-1.03087	0.00619003
Glyma.13G249700	-0.81688	0.000193601	-1.00938	0.00393328	-1.07864	0.00953616
Glyma.13G253500	-0.915825	0.000440627	-0.797495	0.00218985	-0.988447	0.00204339
Glyma.13G361700	-1.67313	2.75e-14	-2.59683	4.5e-34	-0.951029	0.000248
Glyma.14G084600	-1.15821	4.88e-05	-0.79037	0.0104217	-1.17159	0.00261912
Glyma.15G003900	-0.779974	0.00109472	-0.949637	0.000532	-1.03232	0.000501
Glyma.15G026400	-1.14635	0.00125119	-1.11781	0.000634	-1.22216	0.00940799
Glyma.15G061400	-1.55783	0.000142621	-1.45425	0.00970284	-1.90246	0.00916772
Glyma.16G219500	-1.97713	1.01e-35	-1.50445	3.15e-09	-1.51206	6.4e-07
Glyma.17G126500	-0.546149	0.0424768	-0.762379	0.000176	-0.867876	0.00139412
Glyma.17G139900	-1.57481	2.16e-19	-2.14017	0.00448681	-2.04442	0.0208481
Glyma.17G172900	-0.466366	0.0159895	-1.04406	3.45e-07	-0.584706	0.0430803
Glyma.18G258000	-0.632983	0.00102641	-1.14951	1.23e-08	-0.651818	0.00266237
Glyma.19G125800	-0.614936	6.49e-05	-0.841223	8.44e-08	-0.598398	0.01745
Glyma.19G222600	-0.500477	0.0431542	-0.559953	0.00645068	-0.75231	0.00292397
Glyma.19G228400	-0.678484	0.00311337	-1.06621	0.000585	-1.00465	0.0265384
Glyma.20G142000	-0.98602	0.00420752	-1.83039	0.00369611	-2.08959	0.00909685
1Adjusted P-value at 0.05 with Benjamini Hochberg procedure.
