# Supplementary material for: RNA-Seq Dissects Incomplete Activation of Phytoalexin Biosynthesis by the Soybean Transcription Factors GmMYB29A2 and GmNAC42-1
Source: Plants (Basel). 2023 Jan 25;12(3):545. doi: 10.3390/plants12030545 (PMC9921300; doi:10.3390/plants12030545)
Supplement: Supplementary file 1 [file plants-12-00545-s001.zip › Supplemental Table S7. Biosynthetic genelist.xlsx]

## Sheet: Sheet1
Supplemental Table S7. Biosynthetic genelist.
Metabolic Pathway Step	Enzyme	Glyma Number
1	HXK	Glyma.01G007200
1	HXK	Glyma.01G007300
1	HXK	Glyma.17G069900
1	HXK	Glyma.02G207800
1	HXK	Glyma.17G257800
1	HXK	Glyma.12G021700
1	HXK	Glyma.08G033300
1	HXK	Glyma.08G200600
1	HXK	Glyma.01G226900
1	HXK	Glyma.07G124500
1	HXK	Glyma.07G015102
1	HXK	Glyma.11G095600
1	HXK	Glyma.11G015800
1	HXK	Glyma.05G226600
1	HXK	Glyma.14G218800
1	HXK	Glyma.09G144600
1	HXK	Glyma.17G182400
1	HXK	Glyma.17G156200
1	HXK	Glyma.07G015100
1	HXK	Glyma.05G110500
2	G6PD	Glyma.19G082300
2	G6PD	Glyma.16G063200
2	G6PD	Glyma.19G077300
2	G6PD	Glyma.02G096800
2	G6PD	Glyma.18G284600
2	G6PD	Glyma.07G013800
2	G6PD	Glyma.08G198300
2	G6PD	Glyma.08G199000
2	G6PD	Glyma.19G226700
2	G6PD	Glyma.03G229400
3	PGL	Glyma.06G133500
3	PGL	Glyma.14G161800
3	PGL	Glyma.14G162000
3	PGL	Glyma.04G231600
3	PGL	Glyma.01G062000
3	PGL	Glyma.02G120200
4	PGD	Glyma.08G254500
4	PGD	Glyma.18G277300
4	PGD	Glyma.19G038400
4	PGD	Glyma.05G214000
4	PGD	Glyma.08G020500
4	PGD	Glyma.08G033400
4	PGD	Glyma.09G025100
5	RPE	Glyma.17G101700
5	RPE	Glyma.05G025300
5	RPE	Glyma.16G059000
5	RPE	Glyma.19G088400
6	RPI	Glyma.20G125200
6	RPI	Glyma.10G265400
6	RPI	Glyma.19G243000
6	RPI	Glyma.09G030500
6	RPI	Glyma.15G136200
6	RPI	Glyma.19G243800
6	RPI	Glyma.03G246300
6	RPI	Glyma.08G214700
7	AtTKL1	Glyma.11G118700
7	AtTKL1	Glyma.01G120200
8	AtTKL2	Glyma.03G027500
8	AtTKL2	Glyma.10G293500
8	AtTKL2	Glyma.20G243500
8	AtTKL2	Glyma.03G072600
8	AtTKL2	Glyma.05G199800
8	AtTKL2	Glyma.08G007300
8	AtTKL2	Glyma.08G277700
8	AtTKL2	Glyma.08G362900
8	AtTKL2	Glyma.13G043400
8	AtTKL2	Glyma.15G205300
8	AtTKL2	Glyma.18G139200
8	AtTKL2	Glyma.18G299100
8	AtTKL2	Glyma.02G189100
8	AtTKL2	Glyma.05G056400
8	AtTKL2	Glyma.17G138600
8	AtTKL2	Glyma.15G205533
9	DHS	Glyma.15G054700
9	DHS	Glyma.14G176600
9	DHS	Glyma.02G208400
9	DHS	Glyma.06G101700
10	DQS	Glyma.11G078700
10	DQS	Glyma.01G164300
10	DQS	Glyma.13G064100
10	DQS	Glyma.19G020800
11 and 12	MEE32	Glyma.03G242400
11 and 12	MEE32	Glyma.08G264000
11 and 12	MEE32	Glyma.19G239800
11 and 12	MEE32	Glyma.20G230300
11 and 12	MEE32	Glyma.01G082200
11 and 12	MEE32	Glyma.10G158350
11 and 12	MEE32	Glyma.08G264002
13	SK	Glyma.18G121700
13	SK	Glyma.04G219200
13	SK	Glyma.04G219300
13	SK	Glyma.05G183700
13	SK	Glyma.06G146600
13	SK	Glyma.08G141500
13	SK	Glyma.16G154300
13	SK	Glyma.02G073000
13	SK	Glyma.02G193200
13	SK	Glyma.03G203900
13	SK	Glyma.10G083700
13	SK	Glyma.19G201300
13	SK	Glyma.01G014900
13	SK	Glyma.07G152600
13	SK	Glyma.08G289900
13	SK	Glyma.18G134600
13	SK	Glyma.18G134800
13	SK	Glyma.06G146632
13	SK	Glyma.06G146566
14	EPSP	Glyma.01G139600
14	EPSP	Glyma.03G027400
15	EMB1144	Glyma.10G211400
15	EMB1144	Glyma.20G179500
15	EMB1144	Glyma.14G185633
15	EMB1144	Glyma.14G185666
16	CM	Glyma.01G054500
16	CM	Glyma.02G113100
16	CM	Glyma.04G061100
16	CM	Glyma.06G061700
16	CM	Glyma.14G102700
16	CM	Glyma.17G222700
16	CM	Glyma.19G027100
16	CM	Glyma.02G113000
16	CM	Glyma.08G241000
16	CM	Glyma.13G059400
17	AAT	Glyma.11G238300
17	AAT	Glyma.18G019100
17	AAT	Glyma.18G177700
17	AAT	Glyma.05G181000
17	AAT	Glyma.08G138800
17	AAT	Glyma.11G238200
18 and 19	ADT	Glyma.12G072500
18 and 19	ADT	Glyma.12G193000
18 and 19	ADT	Glyma.13G309300
18 and 19	ADT	Glyma.17G012600
18 and 19	ADT	Glyma.19G053000
18 and 19	ADT	Glyma.09G004200
18 and 19	ADT	Glyma.11G151288
18 and 19	ADT	Glyma.11G189100
18 and 19	ADT	Glyma.12G085500
18 and 19	ADT	Glyma.12G181800
18 and 19	ADT	Glyma.13G319000
20	ArAT	Glyma.12G161500
20	ArAT	Glyma.13G294900
20	ArAT	Glyma.13G295000
20	ArAT	Glyma.06G235500
20	ArAT	Glyma.06G235900
21	PAL	Glyma.03G181600
21	PAL	Glyma.03G181700
21	PAL	Glyma.10G058200
21	PAL	Glyma.13G145000
21	PAL	Glyma.19G182300
21	PAL	Glyma.02G309300
21	PAL	Glyma.10G209800
21	PAL	Glyma.20G180800
22	C4H	Glyma.20G114200
22	C4H	Glyma.02G236500
22	C4H	Glyma.10G275600
22	C4H	Glyma.14G205200
22	C4H	Glyma.10G275550
23	4CL	Glyma.01G232400
23	4CL	Glyma.11G010500
23	4CL	Glyma.07G112700
23	4CL	Glyma.11G091600
23	4CL	Glyma.13G095600
23	4CL	Glyma.13G372000
23	4CL	Glyma.15G001700
23	4CL	Glyma.17G064400
23	4CL	Glyma.17G064500
23	4CL	Glyma.17G064600
23	4CL	Glyma.18G136100
23	4CL	Glyma.11G194500
23	4CL	Glyma.12G079600
23	4CL	Glyma.13G323000
23	4CL	Glyma.11G209681
23	4CL	Glyma.14G209600
23	4CL	Glyma.02G240100
23	4CL	Glyma.18G044900
23	4CL	Glyma.13G152900
24	CHR	Glyma.02G307300
24	CHR	Glyma.14G005700
24	CHR	Glyma.09G169700
24	CHR	Glyma.09G169900
24	CHR	Glyma.09G170000
24	CHR	Glyma.15G189300
24	CHR	Glyma.16G219400
24	CHR	Glyma.16G219500
24	CHR	Glyma.16G219600
24	CHR	Glyma.18G285800
24	CHR	Glyma.20G031100
24	CHR	Glyma.02G182500
24	CHR	Glyma.07G167700
24	CHR	Glyma.09G229500
24	CHR	Glyma.12G006800
24	CHR	Glyma.09G169800
25	CHI	Glyma.04G222400
25	CHI	Glyma.06G143000
25	CHI	Glyma.10G292200
25	CHI	Glyma.20G241500
25	CHI	Glyma.20G241600
25	CHI	Glyma.20G241700
25	CHI	Glyma.11G077200
25	CHI	Glyma.16G128800
25	CHI	Glyma.01G166300
25	CHI	Glyma.02G048700
25	CHI	Glyma.03G154600
25	CHI	Glyma.19G156900
25	CHI	Glyma.14G098100
25	CHI	Glyma.17G226600
25	CHI	Glyma.13G262500
25	CHI	Glyma.15G242900
26	IFS (IFS1)	Glyma.07G202300
26	IFS	Glyma.10G092500
26	IFS (IFS2)	Glyma.13G173500
26	IFS	Glyma.19G144700
26	IFS	Glyma.08G350800
26	IFS	Glyma.10G092600
26	IFS	Glyma.11G144100
26	IFS	Glyma.12G067000
26	IFS	Glyma.12G067100
26	IFS	Glyma.12G173900
26	IFS	Glyma.07G202400
27	HIDH	Glyma.01G239600
27	HIDH	Glyma.11G004200
27	HIDH	Glyma.01G239300
27	HIDH	Glyma.01G239400
27	HIDH	Glyma.01G239500
27	HIDH	Glyma.02G133800
27	HIDH	Glyma.02G134000
27	HIDH	Glyma.02G134200
27	HIDH	Glyma.04G037400
27	HIDH	Glyma.04G041100
27	HIDH	Glyma.06G038000
27	HIDH	Glyma.07G211000
27	HIDH	Glyma.07G211100
27	HIDH	Glyma.07G211200
27	HIDH	Glyma.20G143400
27	HIDH	Glyma.02G134100
27	HIDH	Glyma.10G250300
27	HIDH	Glyma.10G250200
27	HIDH	Glyma.07G138600
28	I2'H	Glyma.09G048900
28	I2'H	Glyma.09G049300
28	I2'H	Glyma.15G156100
28	I2'H	Glyma.09G048700
28	I2'H	Glyma.09G048800
28	I2'H	Glyma.09G049100
28	I2'H	Glyma.09G049200
28	I2'H	Glyma.15G156300
28	I2'H	Glyma.08G089500
28	I2'H	Glyma.09G049600
28	I2'H	Glyma.11G051800
29	IFR	Glyma.09G269400
29	IFR	Glyma.12G238200
29	IFR	Glyma.09G269500
29	IFR	Glyma.09G269600
29	IFR	Glyma.12G237900
29	IFR	Glyma.12G238100
29	IFR	Glyma.13G203900
29	IFR	Glyma.18G220500
29	IFR	Glyma.18G220600
30	2'HR	Glyma.13G203800
30	2'HR	Glyma.14G072700
30	2'HR	Glyma.14G072800
30	2'HR	Glyma.14G072900
30	2'HR	Glyma.17G173200
30	2'HR	Glyma.17G252200
30	2'HR	Glyma.17G252300
30	2'HR	Glyma.02G158700
31	PTS	Glyma.19G151200
31	PTS	Glyma.19G151100
31	PTS	Glyma.03G147700
31	PTS	Glyma.19G150900
32	CYP712A1	Glyma.03G142100
32	CYP712A1	Glyma.01G109000
32	CYP712A1	Glyma.12G239100
32	CYP712A1	Glyma.19G144600
32	CYP712A1	Glyma.19G146800
32	CYP712A1	Glyma.02G176200
32	CYP712A1	Glyma.03G142000
32	CYP712A1	Glyma.03G143700
33	DXS	Glyma.18G148700
33	DXS	Glyma.07G252600
33	DXS	Glyma.08G277000
33	DXS	Glyma.08G277100
33	DXS	Glyma.09G200500
33	DXS	Glyma.13G093900
33	DXS	Glyma.13G213500
33	DXS	Glyma.15G099300
33	DXS	Glyma.17G021800
33	DXS	Glyma.17G066500
33	DXS	Glyma.14G135000
33	DXS	Glyma.04G069600
33	DXS	Glyma.06G071300
34	DXR	Glyma.17G089600
34	DXR	Glyma.16G089000
34	DXR	Glyma.05G037500
35	MCT	Glyma.17G002400
36	CMK	Glyma.20G046800
36	CMK	Glyma.17G179800
36	CMK	Glyma.13G072700
37	MDS	Glyma.11G021400
37	MDS	Glyma.12G139900
38	HDS	Glyma.12G173200
38	HDS	Glyma.13G326400
39	HDR	Glyma.11G120900
39	HDR	Glyma.12G046000
40	IDI2	Glyma.09G250200
40	IDI2	Glyma.18G242300
41	G2DT	Glyma.20G245100
42	G4DT	Glyma.10G070300
42	G4DT	Glyma.10G295300
42	G4DT	Glyma.08G274800
42	G4DT	Glyma.20G245200
42	G4DT	Glyma.01G134600
42	G4DT	Glyma.01G134700
42	G4DT	Glyma.03G033100
42	G4DT	Glyma.10G070100
42	G4DT	Glyma.10G070200
42	G4DT	Glyma.11G210300
42	G4DT	Glyma.11G210400
42	G4DT	Glyma.11G210500
42	G4DT	Glyma.13G097800
42	G4DT	Glyma.17G061900
43	GLS	Glyma.01G135200
43	GLS	Glyma.03G226800
43	GLS	Glyma.13G068800
43	GLS	Glyma.13G285300
43	GLS	Glyma.16G195600
43	GLS	Glyma.19G014600
43	GLS	Glyma.15G245300
43	GLS	Glyma.13G265300
43	GLS	Glyma.03G008100
43	GLS	Glyma.05G220500
43	GLS	Glyma.08G026900
43	GLS	Glyma.05G170400
43	GLS	Glyma.09G142800
43	GLS	Glyma.08G140600
43	GLS	Glyma.19G018300
43	GLS	Glyma.18G049500
