# Supplementary material for: RNA-Seq Dissects Incomplete Activation of Phytoalexin Biosynthesis by the Soybean Transcription Factors GmMYB29A2 and GmNAC42-1
Source: Plants (Basel). 2023 Jan 25;12(3):545. doi: 10.3390/plants12030545 (PMC9921300; doi:10.3390/plants12030545)
Supplement: Supplementary file 1 [file plants-12-00545-s001.zip › Supplemental Table S8. Narrowing down glyceollin transcription factor gene candidates_.xlsx]

## Sheet: Sheet1
Supplemental Table S8. Narrowing down glyceollin transcription factor gene candidates.
Genelist	1	2	3
Description	Upregulated by WGE and not p35S::MYB29A2 and p35S::NAC42-1	Genes from Genelist 1 also upregulated in H63 seeds1	Transcription factors from Genelist 2 also co-regulated with glyceollin biosynthesis in acidity stress and dehydration2
Wm82.a2 (Glyma 2.0)	Glyma.03G135800	Glyma.03G135800	Glyma.03G135800
	Glyma.01G007300	Glyma.01G007300	Glyma.01G224800
	Glyma.01G007500	Glyma.01G007500	Glyma.02G006200
	Glyma.01G011600	Glyma.01G011600	Glyma.02G243300
	Glyma.01G027200	Glyma.01G027200	Glyma.04G052800
	Glyma.01G037200	Glyma.01G037200	Glyma.04G229900
	Glyma.01G092900	Glyma.01G092900	Glyma.04G230400
	Glyma.01G127100	Glyma.01G127100	Glyma.05G162400
	Glyma.01G135200	Glyma.01G135200	Glyma.06G077400
	Glyma.01G172600	Glyma.01G172600	Glyma.06G276600
	Glyma.01G182200	Glyma.01G182200	Glyma.07G054000
	Glyma.01G215100	Glyma.01G215100	Glyma.07G091600
	Glyma.01G217700	Glyma.01G217700	Glyma.08G360200
	Glyma.01G224800	Glyma.01G224800	Glyma.09G040400
	Glyma.01G224900	Glyma.01G224900	Glyma.12G100600
	Glyma.01G228600	Glyma.01G228600	Glyma.13G180200
	Glyma.01G236200	Glyma.01G236200	Glyma.14G184800
	Glyma.01G239600	Glyma.01G239600	Glyma.16G080800
	Glyma.02G006200	Glyma.02G006200	Glyma.17G030100
	Glyma.02G028400	Glyma.02G028400	Glyma.19G104200
	Glyma.02G055000	Glyma.02G055000	Glyma.19G190000
	Glyma.02G059500	Glyma.02G059500	Glyma.19G213100
	Glyma.02G079300	Glyma.02G079300
	Glyma.02G083600	Glyma.02G083600
	Glyma.02G099500	Glyma.02G099500
	Glyma.02G128800	Glyma.02G128800
	Glyma.02G151900	Glyma.02G151900
	Glyma.02G202900	Glyma.02G202900
	Glyma.02G224900	Glyma.02G224900
	Glyma.02G232600	Glyma.02G232600
	Glyma.02G243300	Glyma.02G243300
	Glyma.02G248100	Glyma.02G248100
	Glyma.02G291200	Glyma.02G291200
	Glyma.03G040900	Glyma.03G040900
	Glyma.03G045600	Glyma.03G045600
	Glyma.03G046000	Glyma.03G046000
	Glyma.03G058500	Glyma.03G058500
	Glyma.03G102800	Glyma.03G102800
	Glyma.03G131600	Glyma.03G131600
	Glyma.03G134500	Glyma.03G134500
	Glyma.03G142100	Glyma.03G142100
	Glyma.03G162600	Glyma.03G162600
	Glyma.03G176300	Glyma.03G176300
	Glyma.03G181600	Glyma.03G181600
	Glyma.03G181700	Glyma.03G181700
	Glyma.03G187700	Glyma.03G187700
	Glyma.03G187900	Glyma.03G187900
	Glyma.03G189600	Glyma.03G189600
	Glyma.03G197200	Glyma.03G197200
	Glyma.03G201300	Glyma.03G201300
	Glyma.03G208400	Glyma.03G208400
	Glyma.03G215500	Glyma.03G215500
	Glyma.03G221400	Glyma.03G221400
	Glyma.03G221700	Glyma.03G221700
	Glyma.03G226800	Glyma.03G226800
	Glyma.03G238600	Glyma.03G238600
	Glyma.04G008900	Glyma.04G008900
	Glyma.04G012500	Glyma.04G012500
	Glyma.04G013400	Glyma.04G013400
	Glyma.04G013500	Glyma.04G013500
	Glyma.04G020700	Glyma.04G020700
	Glyma.04G030900	Glyma.04G030900
	Glyma.04G041200	Glyma.04G041200
	Glyma.04G042400	Glyma.04G042400
	Glyma.04G042500	Glyma.04G042500
	Glyma.04G052800	Glyma.04G052800
	Glyma.04G069600	Glyma.04G069600
	Glyma.04G079200	Glyma.04G079200
	Glyma.04G091600	Glyma.04G091600
	Glyma.04G092400	Glyma.04G092400
	Glyma.04G099000	Glyma.04G099000
	Glyma.04G102600	Glyma.04G102600
	Glyma.04G113400	Glyma.04G113400
	Glyma.04G119700	Glyma.04G119700
	Glyma.04G178500	Glyma.04G178500
	Glyma.04G209800	Glyma.04G209800
	Glyma.04G229900	Glyma.04G229900
	Glyma.04G230400	Glyma.04G230400
	Glyma.04G238300	Glyma.04G238300
	Glyma.04G251700	Glyma.04G251700
	Glyma.05G005100	Glyma.05G005100
	Glyma.05G015400	Glyma.05G015400
	Glyma.05G042800	Glyma.05G042800
	Glyma.05G055200	Glyma.05G055200
	Glyma.05G058100	Glyma.05G058100
	Glyma.05G065200	Glyma.05G065200
	Glyma.05G065300	Glyma.05G065300
	Glyma.05G065700	Glyma.05G065700
	Glyma.05G099300	Glyma.05G099300
	Glyma.05G107500	Glyma.05G107500
	Glyma.05G108400	Glyma.05G108400
	Glyma.05G114800	Glyma.05G114800
	Glyma.05G123700	Glyma.05G123700
	Glyma.05G123900	Glyma.05G123900
	Glyma.05G142900	Glyma.05G142900
	Glyma.05G153200	Glyma.05G153200
	Glyma.05G157600	Glyma.05G157600
	Glyma.05G162400	Glyma.05G162400
	Glyma.05G182100	Glyma.05G182100
	Glyma.05G189600	Glyma.05G189600
	Glyma.05G195000	Glyma.05G195000
	Glyma.05G195200	Glyma.05G195200
	Glyma.05G196200	Glyma.05G196200
	Glyma.05G198300	Glyma.05G198300
	Glyma.05G209000	Glyma.05G209000
	Glyma.05G212700	Glyma.05G212700
	Glyma.05G222400	Glyma.05G222400
	Glyma.05G236200	Glyma.05G236200
	Glyma.06G006000	Glyma.06G006000
	Glyma.06G063800	Glyma.06G063800
	Glyma.06G064900	Glyma.06G064900
	Glyma.06G077400	Glyma.06G077400
	Glyma.06G110700	Glyma.06G110700
	Glyma.06G111100	Glyma.06G111100
	Glyma.06G127400	Glyma.06G127400
	Glyma.06G143000	Glyma.06G143000
	Glyma.06G149100	Glyma.06G149100
	Glyma.06G167500	Glyma.06G167500
	Glyma.06G176700	Glyma.06G176700
	Glyma.06G197600	Glyma.06G197600
	Glyma.06G220800	Glyma.06G220800
	Glyma.06G257700	Glyma.06G257700
	Glyma.06G262700	Glyma.06G262700
	Glyma.06G265500	Glyma.06G265500
	Glyma.06G273600	Glyma.06G273600
	Glyma.06G276600	Glyma.06G276600
	Glyma.06G302700	Glyma.06G302700
	Glyma.06G310000	Glyma.06G310000
	Glyma.07G025800	Glyma.07G025800
	Glyma.07G032800	Glyma.07G032800
	Glyma.07G052400	Glyma.07G052400
	Glyma.07G054000	Glyma.07G054000
	Glyma.07G065800	Glyma.07G065800
	Glyma.07G073900	Glyma.07G073900
	Glyma.07G074100	Glyma.07G074100
	Glyma.07G087200	Glyma.07G087200
	Glyma.07G091600	Glyma.07G091600
	Glyma.07G096000	Glyma.07G096000
	Glyma.07G127100	Glyma.07G127100
	Glyma.07G132900	Glyma.07G132900
	Glyma.07G136800	Glyma.07G136800
	Glyma.07G155500	Glyma.07G155500
	Glyma.07G192500	Glyma.07G192500
	Glyma.07G198000	Glyma.07G198000
	Glyma.07G202300	Glyma.07G202300
	Glyma.07G216400	Glyma.07G216400
	Glyma.07G243700	Glyma.07G243700
	Glyma.07G267600	Glyma.07G267600
	Glyma.08G004400	Glyma.08G004400
	Glyma.08G012900	Glyma.08G012900
	Glyma.08G021900	Glyma.08G021900
	Glyma.08G064400	Glyma.08G064400
	Glyma.08G098500	Glyma.08G098500
	Glyma.08G109400	Glyma.08G109400
	Glyma.08G113600	Glyma.08G113600
	Glyma.08G118900	Glyma.08G118900
	Glyma.08G119200	Glyma.08G119200
	Glyma.08G127400	Glyma.08G127400
	Glyma.08G139800	Glyma.08G139800
	Glyma.08G149800	Glyma.08G149800
	Glyma.08G169500	Glyma.08G169500
	Glyma.08G180300	Glyma.08G180300
	Glyma.08G207700	Glyma.08G207700
	Glyma.08G210700	Glyma.08G210700
	Glyma.08G211000	Glyma.08G211000
	Glyma.08G218200	Glyma.08G218200
	Glyma.08G234200	Glyma.08G234200
	Glyma.08G247500	Glyma.08G247500
	Glyma.08G307400	Glyma.08G307400
	Glyma.08G325300	Glyma.08G325300
	Glyma.08G330700	Glyma.08G330700
	Glyma.08G341300	Glyma.08G341300
	Glyma.08G345500	Glyma.08G345500
	Glyma.08G351800	Glyma.08G351800
	Glyma.08G360200	Glyma.08G360200
	Glyma.09G004800	Glyma.09G004800
	Glyma.09G022400	Glyma.09G022400
	Glyma.09G027000	Glyma.09G027000
	Glyma.09G040400	Glyma.09G040400
	Glyma.09G070400	Glyma.09G070400
	Glyma.09G118500	Glyma.09G118500
	Glyma.09G126200	Glyma.09G126200
	Glyma.09G128300	Glyma.09G128300
	Glyma.09G128400	Glyma.09G128400
	Glyma.09G130400	Glyma.09G130400
	Glyma.09G145200	Glyma.09G145200
	Glyma.09G162400	Glyma.09G162400
	Glyma.09G162500	Glyma.09G162500
	Glyma.09G163600	Glyma.09G163600
	Glyma.09G172500	Glyma.09G172500
	Glyma.09G173400	Glyma.09G173400
	Glyma.09G183400	Glyma.09G183400
	Glyma.09G255100	Glyma.09G255100
	Glyma.09G268900	Glyma.09G268900
	Glyma.09G270900	Glyma.09G270900
	Glyma.09G277900	Glyma.09G277900
	Glyma.10G018800	Glyma.10G018800
	Glyma.10G036600	Glyma.10G036600
	Glyma.10G058200	Glyma.10G058200
	Glyma.10G066700	Glyma.10G066700
	Glyma.10G092500	Glyma.10G092500
	Glyma.10G097700	Glyma.10G097700
	Glyma.10G122800	Glyma.10G122800
	Glyma.10G152200	Glyma.10G152200
	Glyma.10G156600	Glyma.10G156600
	Glyma.10G169100	Glyma.10G169100
	Glyma.10G170900	Glyma.10G170900
	Glyma.10G173800	Glyma.10G173800
	Glyma.10G176500	Glyma.10G176500
	Glyma.10G209500	Glyma.10G209500
	Glyma.10G252800	Glyma.10G252800
	Glyma.10G252900	Glyma.10G252900
	Glyma.10G253100	Glyma.10G253100
	Glyma.10G253700	Glyma.10G253700
	Glyma.10G257200	Glyma.10G257200
	Glyma.10G278900	Glyma.10G278900
	Glyma.10G290100	Glyma.10G290100
	Glyma.10G292200	Glyma.10G292200
	Glyma.10G295200	Glyma.10G295200
	Glyma.11G010500	Glyma.11G010500
	Glyma.11G013200	Glyma.11G013200
	Glyma.11G041600	Glyma.11G041600
	Glyma.11G049700	Glyma.11G049700
	Glyma.11G061900	Glyma.11G061900
	Glyma.11G064400	Glyma.11G064400
	Glyma.11G065000	Glyma.11G065000
	Glyma.11G082700	Glyma.11G082700
	Glyma.11G121800	Glyma.11G121800
	Glyma.11G123400	Glyma.11G123400
	Glyma.11G124500	Glyma.11G124500
	Glyma.11G152400	Glyma.11G152400
	Glyma.11G163300	Glyma.11G163300
	Glyma.11G204700	Glyma.11G204700
	Glyma.11G215700	Glyma.11G215700
	Glyma.11G218900	Glyma.11G218900
	Glyma.11G219000	Glyma.11G219000
	Glyma.11G223200	Glyma.11G223200
	Glyma.11G224900	Glyma.11G224900
	Glyma.11G225000	Glyma.11G225000
	Glyma.11G238300	Glyma.11G238300
	Glyma.11G252200	Glyma.11G252200
	Glyma.12G007400	Glyma.12G007400
	Glyma.12G015300	Glyma.12G015300
	Glyma.12G037700	Glyma.12G037700
	Glyma.12G048000	Glyma.12G048000
	Glyma.12G048100	Glyma.12G048100
	Glyma.12G054300	Glyma.12G054300
	Glyma.12G099300	Glyma.12G099300
	Glyma.12G100600	Glyma.12G100600
	Glyma.12G130200	Glyma.12G130200
	Glyma.12G140200	Glyma.12G140200
	Glyma.12G141900	Glyma.12G141900
	Glyma.12G143900	Glyma.12G143900
	Glyma.12G188900	Glyma.12G188900
	Glyma.12G197400	Glyma.12G197400
	Glyma.12G200400	Glyma.12G200400
	Glyma.12G212300	Glyma.12G212300
	Glyma.12G218600	Glyma.12G218600
	Glyma.12G234600	Glyma.12G234600
	Glyma.12G238200	Glyma.12G238200
	Glyma.12G238700	Glyma.12G238700
	Glyma.13G001500	Glyma.13G001500
	Glyma.13G001800	Glyma.13G001800
	Glyma.13G035100	Glyma.13G035100
	Glyma.13G035800	Glyma.13G035800
	Glyma.13G043800	Glyma.13G043800
	Glyma.13G056100	Glyma.13G056100
	Glyma.13G068800	Glyma.13G068800
	Glyma.13G085800	Glyma.13G085800
	Glyma.13G087400	Glyma.13G087400
	Glyma.13G097900	Glyma.13G097900
	Glyma.13G111600	Glyma.13G111600
	Glyma.13G116100	Glyma.13G116100
	Glyma.13G117600	Glyma.13G117600
	Glyma.13G122800	Glyma.13G122800
	Glyma.13G123000	Glyma.13G123000
	Glyma.13G129100	Glyma.13G129100
	Glyma.13G139500	Glyma.13G139500
	Glyma.13G145000	Glyma.13G145000
	Glyma.13G180200	Glyma.13G180200
	Glyma.13G188800	Glyma.13G188800
	Glyma.13G210000	Glyma.13G210000
	Glyma.13G221900	Glyma.13G221900
	Glyma.13G229300	Glyma.13G229300
	Glyma.13G235000	Glyma.13G235000
	Glyma.13G247000	Glyma.13G247000
	Glyma.13G251700	Glyma.13G251700
	Glyma.13G253300	Glyma.13G253300
	Glyma.13G258900	Glyma.13G258900
	Glyma.13G266100	Glyma.13G266100
	Glyma.13G266900	Glyma.13G266900
	Glyma.13G284900	Glyma.13G284900
	Glyma.13G300000	Glyma.13G300000
	Glyma.13G302700	Glyma.13G302700
	Glyma.13G312800	Glyma.13G312800
	Glyma.13G327900	Glyma.13G327900
	Glyma.14G022700	Glyma.14G022700
	Glyma.14G042000	Glyma.14G042000
	Glyma.14G048900	Glyma.14G048900
	Glyma.14G049600	Glyma.14G049600
	Glyma.14G054000	Glyma.14G054000
	Glyma.14G056300	Glyma.14G056300
	Glyma.14G073300	Glyma.14G073300
	Glyma.14G081300	Glyma.14G081300
	Glyma.14G091400	Glyma.14G091400
	Glyma.14G093800	Glyma.14G093800
	Glyma.14G121400	Glyma.14G121400
	Glyma.14G132400	Glyma.14G132400
	Glyma.14G171700	Glyma.14G171700
	Glyma.14G184800	Glyma.14G184800
	Glyma.14G191700	Glyma.14G191700
	Glyma.14G201400	Glyma.14G201400
	Glyma.15G003100	Glyma.15G003100
	Glyma.15G021700	Glyma.15G021700
	Glyma.15G025300	Glyma.15G025300
	Glyma.15G038500	Glyma.15G038500
	Glyma.15G042500	Glyma.15G042500
	Glyma.15G062800	Glyma.15G062800
	Glyma.15G065100	Glyma.15G065100
	Glyma.15G065200	Glyma.15G065200
	Glyma.15G079100	Glyma.15G079100
	Glyma.15G084900	Glyma.15G084900
	Glyma.15G097300	Glyma.15G097300
	Glyma.15G099500	Glyma.15G099500
	Glyma.15G115300	Glyma.15G115300
	Glyma.15G128700	Glyma.15G128700
	Glyma.15G152500	Glyma.15G152500
	Glyma.15G232200	Glyma.15G232200
	Glyma.15G256300	Glyma.15G256300
	Glyma.15G264300	Glyma.15G264300
	Glyma.16G021300	Glyma.16G021300
	Glyma.16G038100	Glyma.16G038100
	Glyma.16G043800	Glyma.16G043800
	Glyma.16G047600	Glyma.16G047600
	Glyma.16G054400	Glyma.16G054400
	Glyma.16G064100	Glyma.16G064100
	Glyma.16G078900	Glyma.16G078900
	Glyma.16G080800	Glyma.16G080800
	Glyma.16G103900	Glyma.16G103900
	Glyma.16G146700	Glyma.16G146700
	Glyma.16G153500	Glyma.16G153500
	Glyma.16G164200	Glyma.16G164200
	Glyma.16G170000	Glyma.16G170000
	Glyma.16G173000	Glyma.16G173000
	Glyma.16G188800	Glyma.16G188800
	Glyma.16G207700	Glyma.16G207700
	Glyma.16G212100	Glyma.16G212100
	Glyma.16G212200	Glyma.16G212200
	Glyma.16G214500	Glyma.16G214500
	Glyma.16G215100	Glyma.16G215100
	Glyma.17G019400	Glyma.17G019400
	Glyma.17G030100	Glyma.17G030100
	Glyma.17G058600	Glyma.17G058600
	Glyma.17G093500	Glyma.17G093500
	Glyma.17G096400	Glyma.17G096400
	Glyma.17G123800	Glyma.17G123800
	Glyma.17G144300	Glyma.17G144300
	Glyma.17G147500	Glyma.17G147500
	Glyma.17G158600	Glyma.17G158600
	Glyma.17G159000	Glyma.17G159000
	Glyma.17G213700	Glyma.17G213700
	Glyma.17G244000	Glyma.17G244000
	Glyma.18G009800	Glyma.18G009800
	Glyma.18G022700	Glyma.18G022700
	Glyma.18G026500	Glyma.18G026500
	Glyma.18G032300	Glyma.18G032300
	Glyma.18G032400	Glyma.18G032400
	Glyma.18G032500	Glyma.18G032500
	Glyma.18G032600	Glyma.18G032600
	Glyma.18G032700	Glyma.18G032700
	Glyma.18G032800	Glyma.18G032800
	Glyma.18G032900	Glyma.18G032900
	Glyma.18G033100	Glyma.18G033100
	Glyma.18G033200	Glyma.18G033200
	Glyma.18G056600	Glyma.18G056600
	Glyma.18G081900	Glyma.18G081900
	Glyma.18G096700	Glyma.18G096700
	Glyma.18G118300	Glyma.18G118300
	Glyma.18G122100	Glyma.18G122100
	Glyma.18G138400	Glyma.18G138400
	Glyma.18G148700	Glyma.18G148700
	Glyma.18G187300	Glyma.18G187300
	Glyma.18G193400	Glyma.18G193400
	Glyma.18G225700	Glyma.18G225700
	Glyma.18G234600	Glyma.18G234600
	Glyma.18G256400	Glyma.18G256400
	Glyma.18G256900	Glyma.18G256900
	Glyma.18G271400	Glyma.18G271400
	Glyma.19G014600	Glyma.19G014600
	Glyma.19G030500	Glyma.19G030500
	Glyma.19G052600	Glyma.19G052600
	Glyma.19G067600	Glyma.19G067600
	Glyma.19G081200	Glyma.19G081200
	Glyma.19G085100	Glyma.19G085100
	Glyma.19G104200	Glyma.19G104200
	Glyma.19G137800	Glyma.19G137800
	Glyma.19G145200	Glyma.19G145200
	Glyma.19G148400	Glyma.19G148400
	Glyma.19G164600	Glyma.19G164600
	Glyma.19G174000	Glyma.19G174000
	Glyma.19G187400	Glyma.19G187400
	Glyma.19G190000	Glyma.19G190000
	Glyma.19G205600	Glyma.19G205600
	Glyma.19G213100	Glyma.19G213100
	Glyma.19G233900	Glyma.19G233900
	Glyma.19G236000	Glyma.19G236000
	Glyma.19G255500	Glyma.19G255500
	Glyma.19G259300	Glyma.19G259300
	Glyma.20G013400	Glyma.20G013400
	Glyma.20G022400	Glyma.20G022400
	Glyma.20G046800	Glyma.20G046800
	Glyma.20G113500	Glyma.20G113500
	Glyma.20G130000	Glyma.20G130000
	Glyma.20G137700	Glyma.20G137700
	Glyma.20G137800	Glyma.20G137800
	Glyma.20G137900	Glyma.20G137900
	Glyma.20G138800	Glyma.20G138800
	Glyma.20G140500	Glyma.20G140500
	Glyma.20G169600	Glyma.20G169600
	Glyma.20G178000	Glyma.20G178000
	Glyma.20G205700	Glyma.20G205700
	Glyma.20G209700	Glyma.20G209700
	Glyma.20G224200	Glyma.20G224200
	Glyma.20G236300	Glyma.20G236300
	Glyma.20G237500	Glyma.20G237500
	Glyma.U013300	Glyma.U013300
	Glyma.U017900	Glyma.U017900
	Glyma.01G006300
	Glyma.01G007400
	Glyma.01G009400
	Glyma.01G012500
	Glyma.01G012700
	Glyma.01G014200
	Glyma.01G014700
	Glyma.01G017000
	Glyma.01G017100
	Glyma.01G018000
	Glyma.01G020500
	Glyma.01G022400
	Glyma.01G022500
	Glyma.01G025800
	Glyma.01G026500
	Glyma.01G027100
	Glyma.01G028500
	Glyma.01G028800
	Glyma.01G031400
	Glyma.01G036600
	Glyma.01G037400
	Glyma.01G044900
	Glyma.01G045100
	Glyma.01G047100
	Glyma.01G047700
	Glyma.01G057700
	Glyma.01G058500
	Glyma.01G060800
	Glyma.01G068900
	Glyma.01G070700
	Glyma.01G074000
	Glyma.01G082400
	Glyma.01G082700
	Glyma.01G082800
	Glyma.01G085700
	Glyma.01G085800
	Glyma.01G089600
	Glyma.01G091400
	Glyma.01G094800
	Glyma.01G099600
	Glyma.01G105400
	Glyma.01G108300
	Glyma.01G126600
	Glyma.01G127700
	Glyma.01G136000
	Glyma.01G136900
	Glyma.01G139900
	Glyma.01G143700
	Glyma.01G144300
	Glyma.01G144900
	Glyma.01G147800
	Glyma.01G149400
	Glyma.01G151600
	Glyma.01G152800
	Glyma.01G155400
	Glyma.01G157400
	Glyma.01G158400
	Glyma.01G158500
	Glyma.01G161200
	Glyma.01G161400
	Glyma.01G162800
	Glyma.01G163300
	Glyma.01G167700
	Glyma.01G169100
	Glyma.01G173000
	Glyma.01G175700
	Glyma.01G176200
	Glyma.01G178000
	Glyma.01G179400
	Glyma.01G179700
	Glyma.01G179800
	Glyma.01G180100
	Glyma.01G180400
	Glyma.01G183500
	Glyma.01G183700
	Glyma.01G183900
	Glyma.01G184200
	Glyma.01G185700
	Glyma.01G185900
	Glyma.01G186000
	Glyma.01G188600
	Glyma.01G188700
	Glyma.01G189100
	Glyma.01G193000
	Glyma.01G194900
	Glyma.01G196300
	Glyma.01G196600
	Glyma.01G198200
	Glyma.01G198500
	Glyma.01G199000
	Glyma.01G200500
	Glyma.01G204800
	Glyma.01G211300
	Glyma.01G212000
	Glyma.01G212200
	Glyma.01G213500
	Glyma.01G216600
	Glyma.01G217600
	Glyma.01G217900
	Glyma.01G220800
	Glyma.01G225200
	Glyma.01G226900
	Glyma.01G229400
	Glyma.01G231500
	Glyma.01G232400
	Glyma.01G234300
	Glyma.01G235600
	Glyma.01G239000
	Glyma.01G240700
	Glyma.01G242000
	Glyma.01G244000
	Glyma.01G244500
	Glyma.02G000800
	Glyma.02G015200
	Glyma.02G016600
	Glyma.02G018500
	Glyma.02G022200
	Glyma.02G024700
	Glyma.02G027500
	Glyma.02G029700
	Glyma.02G030800
	Glyma.02G049900
	Glyma.02G057600
	Glyma.02G062800
	Glyma.02G063700
	Glyma.02G080200
	Glyma.02G084400
	Glyma.02G090800
	Glyma.02G102800
	Glyma.02G102900
	Glyma.02G108300
	Glyma.02G109800
	Glyma.02G112100
	Glyma.02G119100
	Glyma.02G120000
	Glyma.02G123100
	Glyma.02G142200
	Glyma.02G142600
	Glyma.02G145300
	Glyma.02G145400
	Glyma.02G148200
	Glyma.02G155000
	Glyma.02G155500
	Glyma.02G171300
	Glyma.02G171900
	Glyma.02G178700
	Glyma.02G182300
	Glyma.02G188600
	Glyma.02G214700
	Glyma.02G216600
	Glyma.02G218100
	Glyma.02G220500
	Glyma.02G222400
	Glyma.02G233400
	Glyma.02G233800
	Glyma.02G240000
	Glyma.02G241600
	Glyma.02G248500
	Glyma.02G248900
	Glyma.02G250700
	Glyma.02G251800
	Glyma.02G254600
	Glyma.02G257600
	Glyma.02G260100
	Glyma.02G260800
	Glyma.02G272700
	Glyma.02G276700
	Glyma.02G280100
	Glyma.02G281000
	Glyma.02G300400
	Glyma.02G300500
	Glyma.02G306200
	Glyma.03G003100
	Glyma.03G003300
	Glyma.03G007500
	Glyma.03G012900
	Glyma.03G014500
	Glyma.03G016500
	Glyma.03G018600
	Glyma.03G019200
	Glyma.03G021900
	Glyma.03G022800
	Glyma.03G023400
	Glyma.03G024000
	Glyma.03G025500
	Glyma.03G027500
	Glyma.03G029000
	Glyma.03G033100
	Glyma.03G036000
	Glyma.03G036700
	Glyma.03G047900
	Glyma.03G057100
	Glyma.03G066700
	Glyma.03G080300
	Glyma.03G087600
	Glyma.03G088000
	Glyma.03G105400
	Glyma.03G106900
	Glyma.03G107300
	Glyma.03G112400
	Glyma.03G113800
	Glyma.03G126000
	Glyma.03G128700
	Glyma.03G130300
	Glyma.03G130500
	Glyma.03G131900
	Glyma.03G134200
	Glyma.03G134700
	Glyma.03G136000
	Glyma.03G137900
	Glyma.03G139100
	Glyma.03G143700
	Glyma.03G144500
	Glyma.03G147600
	Glyma.03G147700
	Glyma.03G147900
	Glyma.03G150400
	Glyma.03G150500
	Glyma.03G152200
	Glyma.03G155300
	Glyma.03G161600
	Glyma.03G163100
	Glyma.03G165100
	Glyma.03G167200
	Glyma.03G168900
	Glyma.03G169000
	Glyma.03G172400
	Glyma.03G174900
	Glyma.03G175600
	Glyma.03G178500
	Glyma.03G179300
	Glyma.03G187000
	Glyma.03G191100
	Glyma.03G191300
	Glyma.03G192200
	Glyma.03G192900
	Glyma.03G194700
	Glyma.03G199500
	Glyma.03G199700
	Glyma.03G201700
	Glyma.03G201900
	Glyma.03G209800
	Glyma.03G212300
	Glyma.03G214300
	Glyma.03G215400
	Glyma.03G217100
	Glyma.03G219100
	Glyma.03G220800
	Glyma.03G221000
	Glyma.03G222900
	Glyma.03G228100
	Glyma.03G231500
	Glyma.03G232600
	Glyma.03G232700
	Glyma.03G234200
	Glyma.03G235100
	Glyma.03G239900
	Glyma.03G243800
	Glyma.03G244500
	Glyma.03G246500
	Glyma.03G247200
	Glyma.03G247400
	Glyma.03G248400
	Glyma.03G248500
	Glyma.03G254600
	Glyma.03G262100
	Glyma.03G264300
	Glyma.04G000100
	Glyma.04G003100
	Glyma.04G008600
	Glyma.04G010300
	Glyma.04G012400
	Glyma.04G012700
	Glyma.04G013800
	Glyma.04G016900
	Glyma.04G019200
	Glyma.04G020400
	Glyma.04G021600
	Glyma.04G034400
	Glyma.04G046900
	Glyma.04G050500
	Glyma.04G054000
	Glyma.04G055600
	Glyma.04G057200
	Glyma.04G060000
	Glyma.04G061500
	Glyma.04G062300
	Glyma.04G064600
	Glyma.04G068800
	Glyma.04G068900
	Glyma.04G071500
	Glyma.04G075900
	Glyma.04G081100
	Glyma.04G086300
	Glyma.04G086800
	Glyma.04G088000
	Glyma.04G088100
	Glyma.04G088800
	Glyma.04G089600
	Glyma.04G090300
	Glyma.04G093800
	Glyma.04G095900
	Glyma.04G102700
	Glyma.04G103900
	Glyma.04G108200
	Glyma.04G112600
	Glyma.04G112700
	Glyma.04G115300
	Glyma.04G117600
	Glyma.04G123500
	Glyma.04G124200
	Glyma.04G129000
	Glyma.04G131100
	Glyma.04G134800
	Glyma.04G137200
	Glyma.04G144600
	Glyma.04G145000
	Glyma.04G145700
	Glyma.04G152900
	Glyma.04G156900
	Glyma.04G164500
	Glyma.04G165300
	Glyma.04G167300
	Glyma.04G173500
	Glyma.04G182000
	Glyma.04G185300
	Glyma.04G190800
	Glyma.04G193200
	Glyma.04G195600
	Glyma.04G197300
	Glyma.04G199300
	Glyma.04G201900
	Glyma.04G205100
	Glyma.04G208300
	Glyma.04G211000
	Glyma.04G213300
	Glyma.04G215200
	Glyma.04G215500
	Glyma.04G216700
	Glyma.04G217400
	Glyma.04G218300
	Glyma.04G220800
	Glyma.04G221500
	Glyma.04G222400
	Glyma.04G222600
	Glyma.04G223500
	Glyma.04G229300
	Glyma.04G235100
	Glyma.04G237300
	Glyma.04G243500
	Glyma.04G249000
	Glyma.04G249400
	Glyma.04G253900
	Glyma.04G254300
	Glyma.04G255000
	Glyma.05G010200
	Glyma.05G012300
	Glyma.05G012500
	Glyma.05G013200
	Glyma.05G013400
	Glyma.05G015200
	Glyma.05G021300
	Glyma.05G024000
	Glyma.05G025300
	Glyma.05G030700
	Glyma.05G031700
	Glyma.05G033300
	Glyma.05G035900
	Glyma.05G037500
	Glyma.05G037700
	Glyma.05G040100
	Glyma.05G042700
	Glyma.05G046000
	Glyma.05G047700
	Glyma.05G049400
	Glyma.05G055700
	Glyma.05G061500
	Glyma.05G063400
	Glyma.05G065100
	Glyma.05G067000
	Glyma.05G068500
	Glyma.05G076800
	Glyma.05G088700
	Glyma.05G091600
	Glyma.05G092200
	Glyma.05G092300
	Glyma.05G095600
	Glyma.05G096500
	Glyma.05G100500
	Glyma.05G101300
	Glyma.05G105000
	Glyma.05G107700
	Glyma.05G111500
	Glyma.05G112400
	Glyma.05G125600
	Glyma.05G126500
	Glyma.05G127600
	Glyma.05G128200
	Glyma.05G130300
	Glyma.05G130600
	Glyma.05G135900
	Glyma.05G136000
	Glyma.05G136200
	Glyma.05G137800
	Glyma.05G139700
	Glyma.05G142000
	Glyma.05G142800
	Glyma.05G151800
	Glyma.05G152400
	Glyma.05G156500
	Glyma.05G157000
	Glyma.05G166100
	Glyma.05G167600
	Glyma.05G169300
	Glyma.05G171000
	Glyma.05G177500
	Glyma.05G183800
	Glyma.05G190100
	Glyma.05G191000
	Glyma.05G191100
	Glyma.05G191300
	Glyma.05G194100
	Glyma.05G194600
	Glyma.05G196700
	Glyma.05G196800
	Glyma.05G196900
	Glyma.05G197400
	Glyma.05G198600
	Glyma.05G200100
	Glyma.05G200200
	Glyma.05G204000
	Glyma.05G205500
	Glyma.05G208200
	Glyma.05G208300
	Glyma.05G209100
	Glyma.05G213300
	Glyma.05G215600
	Glyma.05G222500
	Glyma.05G224400
	Glyma.05G226700
	Glyma.05G229900
	Glyma.05G230400
	Glyma.05G234000
	Glyma.05G234700
	Glyma.05G237300
	Glyma.05G238200
	Glyma.05G238300
	Glyma.05G239400
	Glyma.05G245400
	Glyma.06G000800
	Glyma.06G002800
	Glyma.06G005600
	Glyma.06G008500
	Glyma.06G010200
	Glyma.06G012600
	Glyma.06G013400
	Glyma.06G017300
	Glyma.06G020800
	Glyma.06G029000
	Glyma.06G032200
	Glyma.06G038700
	Glyma.06G042000
	Glyma.06G042300
	Glyma.06G048600
	Glyma.06G050300
	Glyma.06G050600
	Glyma.06G052900
	Glyma.06G053800
	Glyma.06G056300
	Glyma.06G062600
	Glyma.06G064800
	Glyma.06G070400
	Glyma.06G080600
	Glyma.06G080700
	Glyma.06G080800
	Glyma.06G081000
	Glyma.06G085000
	Glyma.06G087400
	Glyma.06G087800
	Glyma.06G090800
	Glyma.06G094400
	Glyma.06G095400
	Glyma.06G096100
	Glyma.06G099700
	Glyma.06G102200
	Glyma.06G105600
	Glyma.06G107200
	Glyma.06G107800
	Glyma.06G108600
	Glyma.06G114000
	Glyma.06G115100
	Glyma.06G118900
	Glyma.06G119800
	Glyma.06G122500
	Glyma.06G131600
	Glyma.06G132700
	Glyma.06G133300
	Glyma.06G135100
	Glyma.06G143800
	Glyma.06G146000
	Glyma.06G149900
	Glyma.06G152900
	Glyma.06G154100
	Glyma.06G156600
	Glyma.06G160500
	Glyma.06G163700
	Glyma.06G164600
	Glyma.06G165700
	Glyma.06G166700
	Glyma.06G168700
	Glyma.06G169000
	Glyma.06G176300
	Glyma.06G184300
	Glyma.06G188800
	Glyma.06G198400
	Glyma.06G198600
	Glyma.06G212800
	Glyma.06G213600
	Glyma.06G218100
	Glyma.06G220600
	Glyma.06G226700
	Glyma.06G238700
	Glyma.06G253700
	Glyma.06G258200
	Glyma.06G262000
	Glyma.06G263500
	Glyma.06G275700
	Glyma.06G277000
	Glyma.06G277700
	Glyma.06G290800
	Glyma.06G296800
	Glyma.06G303100
	Glyma.06G306500
	Glyma.06G307900
	Glyma.06G316900
	Glyma.06G319300
	Glyma.06G319600
	Glyma.06G319700
	Glyma.07G005600
	Glyma.07G006700
	Glyma.07G006800
	Glyma.07G007600
	Glyma.07G011900
	Glyma.07G013300
	Glyma.07G023600
	Glyma.07G029700
	Glyma.07G030900
	Glyma.07G035800
	Glyma.07G042800
	Glyma.07G045500
	Glyma.07G047200
	Glyma.07G047800
	Glyma.07G048700
	Glyma.07G050800
	Glyma.07G051200
	Glyma.07G060400
	Glyma.07G064600
	Glyma.07G064800
	Glyma.07G066700
	Glyma.07G069000
	Glyma.07G073500
	Glyma.07G076100
	Glyma.07G076700
	Glyma.07G077500
	Glyma.07G078300
	Glyma.07G079000
	Glyma.07G080700
	Glyma.07G082200
	Glyma.07G086900
	Glyma.07G087000
	Glyma.07G087300
	Glyma.07G092400
	Glyma.07G095200
	Glyma.07G098900
	Glyma.07G103400
	Glyma.07G104500
	Glyma.07G105300
	Glyma.07G108700
	Glyma.07G109900
	Glyma.07G116900
	Glyma.07G117300
	Glyma.07G117400
	Glyma.07G120900
	Glyma.07G121900
	Glyma.07G125200
	Glyma.07G125300
	Glyma.07G129300
	Glyma.07G129900
	Glyma.07G136500
	Glyma.07G142100
	Glyma.07G147600
	Glyma.07G150100
	Glyma.07G151700
	Glyma.07G153500
	Glyma.07G153800
	Glyma.07G156900
	Glyma.07G157000
	Glyma.07G168700
	Glyma.07G170200
	Glyma.07G178100
	Glyma.07G178600
	Glyma.07G178700
	Glyma.07G185800
	Glyma.07G186000
	Glyma.07G186100
	Glyma.07G186600
	Glyma.07G189500
	Glyma.07G190700
	Glyma.07G202700
	Glyma.07G208700
	Glyma.07G209200
	Glyma.07G210700
	Glyma.07G211500
	Glyma.07G212900
	Glyma.07G213500
	Glyma.07G223100
	Glyma.07G228400
	Glyma.07G233900
	Glyma.07G237900
	Glyma.07G238800
	Glyma.07G241500
	Glyma.07G243600
	Glyma.07G246800
	Glyma.07G248300
	Glyma.07G255200
	Glyma.07G255600
	Glyma.07G255700
	Glyma.07G256500
	Glyma.07G259000
	Glyma.07G259900
	Glyma.07G261100
	Glyma.07G262700
	Glyma.07G262900
	Glyma.07G265800
	Glyma.07G268700
	Glyma.07G269500
	Glyma.07G270100
	Glyma.07G274000
	Glyma.08G000300
	Glyma.08G001600
	Glyma.08G003300
	Glyma.08G003800
	Glyma.08G003900
	Glyma.08G009800
	Glyma.08G010300
	Glyma.08G013700
	Glyma.08G014900
	Glyma.08G018800
	Glyma.08G019700
	Glyma.08G021000
	Glyma.08G021400
	Glyma.08G023800
	Glyma.08G026000
	Glyma.08G028200
	Glyma.08G029200
	Glyma.08G032600
	Glyma.08G033400
	Glyma.08G033800
	Glyma.08G034400
	Glyma.08G039500
	Glyma.08G040200
	Glyma.08G040800
	Glyma.08G042200
	Glyma.08G042700
	Glyma.08G043000
	Glyma.08G043800
	Glyma.08G044700
	Glyma.08G045300
	Glyma.08G049300
	Glyma.08G050400
	Glyma.08G050500
	Glyma.08G056200
	Glyma.08G065700
	Glyma.08G065800
	Glyma.08G067700
	Glyma.08G070000
	Glyma.08G070100
	Glyma.08G071300
	Glyma.08G072400
	Glyma.08G073600
	Glyma.08G077100
	Glyma.08G080000
	Glyma.08G080200
	Glyma.08G082400
	Glyma.08G086300
	Glyma.08G094500
	Glyma.08G099600
	Glyma.08G099700
	Glyma.08G102600
	Glyma.08G103100
	Glyma.08G105000
	Glyma.08G107200
	Glyma.08G108600
	Glyma.08G109300
	Glyma.08G110600
	Glyma.08G111000
	Glyma.08G118200
	Glyma.08G119100
	Glyma.08G125100
	Glyma.08G126400
	Glyma.08G129600
	Glyma.08G129800
	Glyma.08G132100
	Glyma.08G132400
	Glyma.08G133200
	Glyma.08G134600
	Glyma.08G134700
	Glyma.08G137200
	Glyma.08G147700
	Glyma.08G149300
	Glyma.08G150500
	Glyma.08G150800
	Glyma.08G152600
	Glyma.08G156400
	Glyma.08G156500
	Glyma.08G161000
	Glyma.08G168700
	Glyma.08G169700
	Glyma.08G178500
	Glyma.08G179200
	Glyma.08G180800
	Glyma.08G182000
	Glyma.08G182100
	Glyma.08G182500
	Glyma.08G182700
	Glyma.08G182800
	Glyma.08G185700
	Glyma.08G186200
	Glyma.08G194600
	Glyma.08G197600
	Glyma.08G200500
	Glyma.08G201700
	Glyma.08G205200
	Glyma.08G210800
	Glyma.08G214500
	Glyma.08G221000
	Glyma.08G222000
	Glyma.08G222700
	Glyma.08G226000
	Glyma.08G231500
	Glyma.08G232600
	Glyma.08G234600
	Glyma.08G235400
	Glyma.08G235800
	Glyma.08G237200
	Glyma.08G242400
	Glyma.08G244700
	Glyma.08G247700
	Glyma.08G249500
	Glyma.08G255900
	Glyma.08G257200
	Glyma.08G259100
	Glyma.08G260200
	Glyma.08G263700
	Glyma.08G263800
	Glyma.08G266700
	Glyma.08G268900
	Glyma.08G270600
	Glyma.08G271400
	Glyma.08G274800
	Glyma.08G280600
	Glyma.08G282400
	Glyma.08G283100
	Glyma.08G284100
	Glyma.08G290100
	Glyma.08G293900
	Glyma.08G295700
	Glyma.08G298500
	Glyma.08G298800
	Glyma.08G299900
	Glyma.08G303100
	Glyma.08G305100
	Glyma.08G305500
	Glyma.08G316100
	Glyma.08G316700
	Glyma.08G317100
	Glyma.08G318100
	Glyma.08G318200
	Glyma.08G319000
	Glyma.08G319100
	Glyma.08G324000
	Glyma.08G329100
	Glyma.08G329200
	Glyma.08G330800
	Glyma.08G333700
	Glyma.08G337100
	Glyma.08G338200
	Glyma.08G341200
	Glyma.08G342500
	Glyma.08G345800
	Glyma.08G346600
	Glyma.08G347600
	Glyma.08G349200
	Glyma.08G349700
	Glyma.08G352400
	Glyma.08G353700
	Glyma.08G355900
	Glyma.08G356300
	Glyma.09G000100
	Glyma.09G001400
	Glyma.09G002300
	Glyma.09G002400
	Glyma.09G004400
	Glyma.09G005700
	Glyma.09G006200
	Glyma.09G008500
	Glyma.09G008600
	Glyma.09G010600
	Glyma.09G018200
	Glyma.09G019600
	Glyma.09G025100
	Glyma.09G025600
	Glyma.09G035600
	Glyma.09G037900
	Glyma.09G041400
	Glyma.09G049100
	Glyma.09G050200
	Glyma.09G052200
	Glyma.09G052800
	Glyma.09G060700
	Glyma.09G066400
	Glyma.09G068800
	Glyma.09G071600
	Glyma.09G074300
	Glyma.09G091800
	Glyma.09G091900
	Glyma.09G099200
	Glyma.09G101100
	Glyma.09G107100
	Glyma.09G116300
	Glyma.09G116400
	Glyma.09G127700
	Glyma.09G128500
	Glyma.09G138600
	Glyma.09G145000
	Glyma.09G149200
	Glyma.09G151900
	Glyma.09G158400
	Glyma.09G162600
	Glyma.09G162700
	Glyma.09G162800
	Glyma.09G163000
	Glyma.09G163100
	Glyma.09G163300
	Glyma.09G164100
	Glyma.09G170300
	Glyma.09G171900
	Glyma.09G174000
	Glyma.09G183800
	Glyma.09G189600
	Glyma.09G192400
	Glyma.09G193400
	Glyma.09G196300
	Glyma.09G196400
	Glyma.09G198400
	Glyma.09G202700
	Glyma.09G204500
	Glyma.09G205100
	Glyma.09G207200
	Glyma.09G208300
	Glyma.09G209900
	Glyma.09G212900
	Glyma.09G215000
	Glyma.09G215500
	Glyma.09G216400
	Glyma.09G218800
	Glyma.09G224300
	Glyma.09G224400
	Glyma.09G224800
	Glyma.09G234400
	Glyma.09G236000
	Glyma.09G237100
	Glyma.09G241100
	Glyma.09G245300
	Glyma.09G250200
	Glyma.09G253900
	Glyma.09G255400
	Glyma.09G257600
	Glyma.09G262800
	Glyma.09G265500
	Glyma.09G265600
	Glyma.09G269500
	Glyma.09G269600
	Glyma.09G276500
	Glyma.09G278000
	Glyma.09G281700
	Glyma.09G281900
	Glyma.09G284700
	Glyma.10G001200
	Glyma.10G001700
	Glyma.10G003000
	Glyma.10G005200
	Glyma.10G007900
	Glyma.10G008600
	Glyma.10G008700
	Glyma.10G009500
	Glyma.10G010700
	Glyma.10G017200
	Glyma.10G028700
	Glyma.10G029000
	Glyma.10G036700
	Glyma.10G038400
	Glyma.10G041200
	Glyma.10G043300
	Glyma.10G046500
	Glyma.10G047800
	Glyma.10G048100
	Glyma.10G048500
	Glyma.10G049100
	Glyma.10G050800
	Glyma.10G051600
	Glyma.10G055300
	Glyma.10G055400
	Glyma.10G057600
	Glyma.10G057800
	Glyma.10G062500
	Glyma.10G062600
	Glyma.10G065700
	Glyma.10G067600
	Glyma.10G073300
	Glyma.10G082300
	Glyma.10G098500
	Glyma.10G108600
	Glyma.10G109700
	Glyma.10G112700
	Glyma.10G113300
	Glyma.10G119400
	Glyma.10G120400
	Glyma.10G143300
	Glyma.10G143600
	Glyma.10G146900
	Glyma.10G149400
	Glyma.10G156300
	Glyma.10G157500
	Glyma.10G158600
	Glyma.10G159500
	Glyma.10G166000
	Glyma.10G167100
	Glyma.10G173000
	Glyma.10G175900
	Glyma.10G176200
	Glyma.10G182900
	Glyma.10G186600
	Glyma.10G188500
	Glyma.10G188600
	Glyma.10G192100
	Glyma.10G194700
	Glyma.10G201600
	Glyma.10G201700
	Glyma.10G203900
	Glyma.10G204000
	Glyma.10G205000
	Glyma.10G205200
	Glyma.10G207900
	Glyma.10G209100
	Glyma.10G211300
	Glyma.10G211400
	Glyma.10G212900
	Glyma.10G217500
	Glyma.10G217900
	Glyma.10G222400
	Glyma.10G223200
	Glyma.10G224800
	Glyma.10G225800
	Glyma.10G226200
	Glyma.10G226300
	Glyma.10G232100
	Glyma.10G234200
	Glyma.10G239600
	Glyma.10G241500
	Glyma.10G241700
	Glyma.10G242600
	Glyma.10G244000
	Glyma.10G247500
	Glyma.10G249300
	Glyma.10G252400
	Glyma.10G252700
	Glyma.10G256500
	Glyma.10G261300
	Glyma.10G266000
	Glyma.10G266400
	Glyma.10G266900
	Glyma.10G272000
	Glyma.10G272800
	Glyma.10G276200
	Glyma.10G277800
	Glyma.10G284400
	Glyma.10G288600
	Glyma.10G288700
	Glyma.10G289700
	Glyma.10G290200
	Glyma.10G290800
	Glyma.10G292300
	Glyma.10G296900
	Glyma.11G004400
	Glyma.11G008600
	Glyma.11G012300
	Glyma.11G015800
	Glyma.11G015900
	Glyma.11G018200
	Glyma.11G020000
	Glyma.11G026300
	Glyma.11G031400
	Glyma.11G035200
	Glyma.11G039800
	Glyma.11G039900
	Glyma.11G041300
	Glyma.11G042100
	Glyma.11G042800
	Glyma.11G043100
	Glyma.11G043300
	Glyma.11G044400
	Glyma.11G044700
	Glyma.11G045300
	Glyma.11G045800
	Glyma.11G046100
	Glyma.11G046400
	Glyma.11G051400
	Glyma.11G051700
	Glyma.11G052100
	Glyma.11G053100
	Glyma.11G054600
	Glyma.11G056000
	Glyma.11G056200
	Glyma.11G056500
	Glyma.11G062700
	Glyma.11G067300
	Glyma.11G068000
	Glyma.11G069800
	Glyma.11G070400
	Glyma.11G070500
	Glyma.11G070800
	Glyma.11G075400
	Glyma.11G078500
	Glyma.11G079500
	Glyma.11G081000
	Glyma.11G082500
	Glyma.11G089300
	Glyma.11G089500
	Glyma.11G091600
	Glyma.11G093200
	Glyma.11G095100
	Glyma.11G101200
	Glyma.11G104500
	Glyma.11G114800
	Glyma.11G117600
	Glyma.11G121700
	Glyma.11G123300
	Glyma.11G128700
	Glyma.11G132800
	Glyma.11G133200
	Glyma.11G136000
	Glyma.11G139200
	Glyma.11G139600
	Glyma.11G140100
	Glyma.11G140600
	Glyma.11G141400
	Glyma.11G144500
	Glyma.11G149900
	Glyma.11G153500
	Glyma.11G153600
	Glyma.11G153700
	Glyma.11G161400
	Glyma.11G161500
	Glyma.11G162100
	Glyma.11G164900
	Glyma.11G167300
	Glyma.11G180700
	Glyma.11G180900
	Glyma.11G183800
	Glyma.11G189700
	Glyma.11G192300
	Glyma.11G195800
	Glyma.11G201800
	Glyma.11G204500
	Glyma.11G221200
	Glyma.11G222000
	Glyma.11G223000
	Glyma.11G223600
	Glyma.11G224100
	Glyma.11G225600
	Glyma.11G227300
	Glyma.11G230600
	Glyma.11G234300
	Glyma.11G235100
	Glyma.11G236700
	Glyma.11G237700
	Glyma.11G239300
	Glyma.11G239800
	Glyma.11G242100
	Glyma.11G243400
	Glyma.11G247500
	Glyma.11G248500
	Glyma.11G250500
	Glyma.11G254100
	Glyma.11G254400
	Glyma.11G254900
	Glyma.11G256200
	Glyma.12G000100
	Glyma.12G000200
	Glyma.12G002300
	Glyma.12G005900
	Glyma.12G009100
	Glyma.12G011400
	Glyma.12G012600
	Glyma.12G012700
	Glyma.12G015500
	Glyma.12G015600
	Glyma.12G031300
	Glyma.12G039100
	Glyma.12G040600
	Glyma.12G050500
	Glyma.12G052400
	Glyma.12G053200
	Glyma.12G059700
	Glyma.12G059800
	Glyma.12G065900
	Glyma.12G071300
	Glyma.12G072500
	Glyma.12G073200
	Glyma.12G073900
	Glyma.12G075900
	Glyma.12G078500
	Glyma.12G080300
	Glyma.12G081100
	Glyma.12G086100
	Glyma.12G088500
	Glyma.12G091800
	Glyma.12G092300
	Glyma.12G096500
	Glyma.12G098300
	Glyma.12G098700
	Glyma.12G106900
	Glyma.12G131200
	Glyma.12G135700
	Glyma.12G136000
	Glyma.12G137300
	Glyma.12G137400
	Glyma.12G137500
	Glyma.12G152700
	Glyma.12G155200
	Glyma.12G173500
	Glyma.12G183800
	Glyma.12G186800
	Glyma.12G191600
	Glyma.12G192700
	Glyma.12G192900
	Glyma.12G201100
	Glyma.12G205800
	Glyma.12G207800
	Glyma.12G209700
	Glyma.12G209900
	Glyma.12G210300
	Glyma.12G215900
	Glyma.12G216100
	Glyma.12G218100
	Glyma.12G226200
	Glyma.12G226900
	Glyma.12G228100
	Glyma.12G228900
	Glyma.12G231800
	Glyma.12G232100
	Glyma.12G233100
	Glyma.12G240900
	Glyma.13G003400
	Glyma.13G011500
	Glyma.13G015200
	Glyma.13G017500
	Glyma.13G020600
	Glyma.13G022400
	Glyma.13G024100
	Glyma.13G024400
	Glyma.13G024500
	Glyma.13G031600
	Glyma.13G034800
	Glyma.13G038900
	Glyma.13G042200
	Glyma.13G044600
	Glyma.13G045700
	Glyma.13G047700
	Glyma.13G054500
	Glyma.13G061100
	Glyma.13G062200
	Glyma.13G062600
	Glyma.13G064200
	Glyma.13G064300
	Glyma.13G064500
	Glyma.13G066200
	Glyma.13G067100
	Glyma.13G067700
	Glyma.13G067800
	Glyma.13G076600
	Glyma.13G084800
	Glyma.13G086200
	Glyma.13G087900
	Glyma.13G093100
	Glyma.13G096500
	Glyma.13G096900
	Glyma.13G098900
	Glyma.13G099700
	Glyma.13G106100
	Glyma.13G106700
	Glyma.13G108800
	Glyma.13G110000
	Glyma.13G110700
	Glyma.13G112600
	Glyma.13G118800
	Glyma.13G122700
	Glyma.13G123400
	Glyma.13G134900
	Glyma.13G135500
	Glyma.13G137500
	Glyma.13G139100
	Glyma.13G142400
	Glyma.13G146700
	Glyma.13G147100
	Glyma.13G148300
	Glyma.13G149600
	Glyma.13G149900
	Glyma.13G154300
	Glyma.13G155400
	Glyma.13G162700
	Glyma.13G163500
	Glyma.13G164400
	Glyma.13G166300
	Glyma.13G176100
	Glyma.13G176400
	Glyma.13G177500
	Glyma.13G181400
	Glyma.13G181800
	Glyma.13G182600
	Glyma.13G185700
	Glyma.13G185900
	Glyma.13G186300
	Glyma.13G186400
	Glyma.13G186600
	Glyma.13G192200
	Glyma.13G193800
	Glyma.13G195200
	Glyma.13G196500
	Glyma.13G207800
	Glyma.13G208000
	Glyma.13G208400
	Glyma.13G211600
	Glyma.13G213300
	Glyma.13G216000
	Glyma.13G217400
	Glyma.13G217600
	Glyma.13G218200
	Glyma.13G221700
	Glyma.13G227500
	Glyma.13G231900
	Glyma.13G233300
	Glyma.13G235300
	Glyma.13G236500
	Glyma.13G236800
	Glyma.13G237200
	Glyma.13G246800
	Glyma.13G247100
	Glyma.13G251200
	Glyma.13G252400
	Glyma.13G256800
	Glyma.13G259300
	Glyma.13G259900
	Glyma.13G260600
	Glyma.13G263300
	Glyma.13G263600
	Glyma.13G265300
	Glyma.13G269600
	Glyma.13G273900
	Glyma.13G274100
	Glyma.13G278100
	Glyma.13G278700
	Glyma.13G278900
	Glyma.13G281400
	Glyma.13G286300
	Glyma.13G292100
	Glyma.13G296900
	Glyma.13G297700
	Glyma.13G299300
	Glyma.13G302800
	Glyma.13G304900
	Glyma.13G308300
	Glyma.13G310600
	Glyma.13G313000
	Glyma.13G315800
	Glyma.13G316100
	Glyma.13G324500
	Glyma.13G327800
	Glyma.13G328100
	Glyma.13G329600
	Glyma.13G331400
	Glyma.13G337800
	Glyma.13G340300
	Glyma.13G342400
	Glyma.13G346600
	Glyma.13G352400
	Glyma.13G352800
	Glyma.13G361800
	Glyma.13G367600
	Glyma.13G370000
	Glyma.14G002400
	Glyma.14G003200
	Glyma.14G007300
	Glyma.14G010100
	Glyma.14G018200
	Glyma.14G021200
	Glyma.14G024900
	Glyma.14G026300
	Glyma.14G030400
	Glyma.14G032300
	Glyma.14G033300
	Glyma.14G033600
	Glyma.14G034600
	Glyma.14G034800
	Glyma.14G038100
	Glyma.14G038200
	Glyma.14G041800
	Glyma.14G045100
	Glyma.14G050100
	Glyma.14G050500
	Glyma.14G054100
	Glyma.14G054400
	Glyma.14G054800
	Glyma.14G056200
	Glyma.14G058600
	Glyma.14G058700
	Glyma.14G062000
	Glyma.14G067500
	Glyma.14G068700
	Glyma.14G070100
	Glyma.14G077000
	Glyma.14G077500
	Glyma.14G077800
	Glyma.14G079500
	Glyma.14G080200
	Glyma.14G088900
	Glyma.14G091900
	Glyma.14G093200
	Glyma.14G100200
	Glyma.14G101600
	Glyma.14G106500
	Glyma.14G110700
	Glyma.14G118600
	Glyma.14G119400
	Glyma.14G127500
	Glyma.14G131900
	Glyma.14G133600
	Glyma.14G136300
	Glyma.14G140400
	Glyma.14G142500
	Glyma.14G147700
	Glyma.14G152700
	Glyma.14G155600
	Glyma.14G155700
	Glyma.14G155900
	Glyma.14G156200
	Glyma.14G157600
	Glyma.14G158600
	Glyma.14G162300
	Glyma.14G182100
	Glyma.14G183800
	Glyma.14G190900
	Glyma.14G191900
	Glyma.14G192100
	Glyma.14G192700
	Glyma.14G192900
	Glyma.14G200200
	Glyma.14G200600
	Glyma.14G201600
	Glyma.14G203800
	Glyma.14G207300
	Glyma.14G208300
	Glyma.14G209000
	Glyma.14G211300
	Glyma.14G220300
	Glyma.14G221800
	Glyma.15G001300
	Glyma.15G003200
	Glyma.15G003300
	Glyma.15G013300
	Glyma.15G014500
	Glyma.15G018200
	Glyma.15G022300
	Glyma.15G025900
	Glyma.15G033500
	Glyma.15G034000
	Glyma.15G036700
	Glyma.15G043600
	Glyma.15G044000
	Glyma.15G044500
	Glyma.15G044800
	Glyma.15G046600
	Glyma.15G047100
	Glyma.15G048600
	Glyma.15G049500
	Glyma.15G049600
	Glyma.15G049900
	Glyma.15G051100
	Glyma.15G051600
	Glyma.15G053600
	Glyma.15G054700
	Glyma.15G059800
	Glyma.15G066100
	Glyma.15G067800
	Glyma.15G069100
	Glyma.15G077100
	Glyma.15G079000
	Glyma.15G079200
	Glyma.15G084400
	Glyma.15G084500
	Glyma.15G084600
	Glyma.15G090300
	Glyma.15G091400
	Glyma.15G097100
	Glyma.15G098200
	Glyma.15G101100
	Glyma.15G103000
	Glyma.15G105100
	Glyma.15G107100
	Glyma.15G108700
	Glyma.15G110600
	Glyma.15G112600
	Glyma.15G113700
	Glyma.15G115100
	Glyma.15G118400
	Glyma.15G126000
	Glyma.15G126500
	Glyma.15G127600
	Glyma.15G131200
	Glyma.15G146500
	Glyma.15G152100
	Glyma.15G152400
	Glyma.15G159000
	Glyma.15G163700
	Glyma.15G169800
	Glyma.15G173400
	Glyma.15G173800
	Glyma.15G174100
	Glyma.15G176600
	Glyma.15G183500
	Glyma.15G196800
	Glyma.15G202600
	Glyma.15G203900
	Glyma.15G207200
	Glyma.15G213000
	Glyma.15G214200
	Glyma.15G216000
	Glyma.15G223400
	Glyma.15G223900
	Glyma.15G224000
	Glyma.15G230500
	Glyma.15G240500
	Glyma.15G245700
	Glyma.15G248200
	Glyma.15G249800
	Glyma.15G258800
	Glyma.15G262100
	Glyma.15G263100
	Glyma.15G265300
	Glyma.15G266600
	Glyma.15G267700
	Glyma.15G270200
	Glyma.15G272000
	Glyma.15G275400
	Glyma.16G000300
	Glyma.16G011500
	Glyma.16G013400
	Glyma.16G013500
	Glyma.16G015700
	Glyma.16G018400
	Glyma.16G020300
	Glyma.16G020700
	Glyma.16G022300
	Glyma.16G022700
	Glyma.16G025800
	Glyma.16G027700
	Glyma.16G028200
	Glyma.16G029700
	Glyma.16G035000
	Glyma.16G035100
	Glyma.16G035400
	Glyma.16G040900
	Glyma.16G044400
	Glyma.16G050500
	Glyma.16G051300
	Glyma.16G051500
	Glyma.16G059700
	Glyma.16G060700
	Glyma.16G063500
	Glyma.16G074800
	Glyma.16G075500
	Glyma.16G078100
	Glyma.16G082100
	Glyma.16G094900
	Glyma.16G097300
	Glyma.16G099100
	Glyma.16G102300
	Glyma.16G108400
	Glyma.16G108700
	Glyma.16G112800
	Glyma.16G115500
	Glyma.16G116400
	Glyma.16G116600
	Glyma.16G130000
	Glyma.16G134800
	Glyma.16G141000
	Glyma.16G141500
	Glyma.16G143900
	Glyma.16G144100
	Glyma.16G145200
	Glyma.16G147400
	Glyma.16G147500
	Glyma.16G149900
	Glyma.16G153400
	Glyma.16G153800
	Glyma.16G156400
	Glyma.16G164800
	Glyma.16G175200
	Glyma.16G175300
	Glyma.16G175400
	Glyma.16G176100
	Glyma.16G195700
	Glyma.16G195800
	Glyma.16G196200
	Glyma.16G200500
	Glyma.16G201800
	Glyma.16G209800
	Glyma.16G211400
	Glyma.16G213700
	Glyma.16G219200
	Glyma.16G222300
	Glyma.17G001900
	Glyma.17G007300
	Glyma.17G008000
	Glyma.17G009200
	Glyma.17G010100
	Glyma.17G010600
	Glyma.17G011100
	Glyma.17G011900
	Glyma.17G012900
	Glyma.17G015000
	Glyma.17G015200
	Glyma.17G019300
	Glyma.17G019500
	Glyma.17G022900
	Glyma.17G023700
	Glyma.17G024800
	Glyma.17G030000
	Glyma.17G032400
	Glyma.17G035400
	Glyma.17G036300
	Glyma.17G038000
	Glyma.17G041600
	Glyma.17G047500
	Glyma.17G048500
	Glyma.17G049200
	Glyma.17G050800
	Glyma.17G052600
	Glyma.17G053000
	Glyma.17G053300
	Glyma.17G059600
	Glyma.17G060300
	Glyma.17G061700
	Glyma.17G061800
	Glyma.17G062600
	Glyma.17G073300
	Glyma.17G074800
	Glyma.17G076100
	Glyma.17G080500
[truncated: 369 more rows]
