# Supplementary material for: RNA-Seq Dissects Incomplete Activation of Phytoalexin Biosynthesis by the Soybean Transcription Factors GmMYB29A2 and GmNAC42-1
Source: Plants (Basel). 2023 Jan 25;12(3):545. doi: 10.3390/plants12030545 (PMC9921300; doi:10.3390/plants12030545)
Supplement: Supplementary file 1 [file plants-12-00545-s001.zip › Supplemental table S9. Primers.xlsx]

## Sheet: Sheet1
Table S9: Primers list.
Primer		Sequence	Purpose
HSF6-1F	Glyma.03G135800	AAAAAGCAGGCTtaacaATGGAAGGAACAAGTGAAAAGG	Cloning / over-expression / Y1H
HSF6-1R	Glyma.03G135800	AGAAAGCTGGGTGAGCTATTTGCATGACTGAGACAA	Cloning / over-expression / Y1H
pHIDHf	Glyma.01G239600	TGCCTTGGAGACC TGGCGCAATAACAAACAAAA	Cloning / Y1H
pHIDHr	Glyma.01G239600	TTCTTCCGAGACC TTGTCCACATTTTGACCATGA	Cloning / Y1H
pI2'Hf	Glyma.15G156100	TGCCTTGGAGACCTTTTTAATGCATTTTGTACTCTTGAA	Cloning / Y1H
pI2'Hr	Glyma.15G156100	TTCTTCCGAGACC TGCTGTCTGTCAGTGTTTTCG	Cloning / Y1H
qUBIQUITIN3f	Glyma.20G141600	GTGTAATGTTGGATGTGTTCCC	qRT-PCR
qUBIQUITIN3r	Glyma.20G141600	CCGAACTTATTTTCAAGGGACAT	qRT-PCR
qHSF6-1f	Glyma.03G135800	ACCAAACCAAGCAACACTCC	qRT-PCR
qHSF6-1r	Glyma.03G135800	TCGCTTGTTTTCATCCACAA	qRT-PCR
qNAC42-1	Glyma.02G284300	CTCAGCAGCAGCACCAATAA	qRT-PCR
qNAC42-1	Glyma.02G284300	AAGTATGGCTTGCCGTTGTC	qRT-PCR
qGmMYB29A2f	Glyma.02G005600	CTTGGACCCCAGAGGAAGA	qRT-PCR
qGmMYB29A2r	Glyma.02G005600	CAGCTCTTGCCACACCTTAAT	qRT-PCR
qI2′Hf	Glyma.15G156100	CCATGCTTTTTGGTGGAACT	qRT-PCR
qI2′Hr	Glyma.15G156100	GCCTTCTTCAACACCTCTGG	qRT-PCR
qG4DTf	Glyma.10G295300	TGGCTTTCGGAGTTGGTATC	qRT-PCR
qG4DTr	Glyma.10G295300	GAACAGCATTTCCCATACCC	qRT-PCR
qIFS2f	Glyma.13G173500	GGAGAGGTTGTTGAGGGTGA	qRT-PCR
qIFS2r	Glyma.13G173500	GACCCTTGATGTGGTCCTTG	qRT-PCR
q4CHf	Glyma.20G114200	GGTCCCGTGTTCCTACTCAA	qRT-PCR
q4CHr	Glyma.20G114200	GAGCCAAATTCTACGCCTTG	qRT-PCR
qHIDHf	Glyma.01G239600	GGAATCGATAACCCCTGGAT	qRT-PCR
qHIDHr	Glyma.01G239600	TGAACTCGTCTTTGCCAGTG	qRT-PCR
